# Supplementary material for: Synthesis and application of P,olefin type axially chiral ligands with sec-alkyl groups
Source: Royal Society of Chemistry journal article supplement (doi:10.1039/c9ob00075e), 2019-01-01

# Supporting Information

## Synthesis and Application of P,Olefin Type Axially Chiral Ligands with *sec*-Alkyl Groups

Takashi Mino,<sup>\*a,b,c</sup> Daiki Yamaguchi,<sup>a</sup> Chihiro Masuda,<sup>a</sup> Junpei Youda,<sup>a</sup> Toshibumi Ebisawa,<sup>a</sup> Yasushi Yoshida,<sup>a,b,c</sup> Masami Sakamoto<sup>a,b</sup>

E-mail: tmino@faculty.chiba-u.jp

<sup>a</sup> *Graduate School of Engineering, Chiba University, 1-33, Yayoi-cho, Inage-ku, Chiba 263-8522, Japan*

<sup>b</sup> *Molecular Chirality Research Center, Chiba University, 1-33, Yayoi-cho, Inage-ku, Chiba 263-8522, Japan*

<sup>c</sup> *Soft Molecular Activation Research Center, Chiba University, 1-33, Yayoi-cho, Inage-ku, Chiba 263-8522, Japan*

### Table of Contents

1. Data of thermal racemization of **3b-d**.
2. Copies of <sup>1</sup>H, <sup>13</sup>C and <sup>31</sup>P NMR spectra of **5**, **6**, **2**, **7**, and **8**.
3. Copies of <sup>1</sup>H, <sup>13</sup>C and <sup>31</sup>P NMR spectra and HPLC charts of **3**.
4. Copies of <sup>1</sup>H and <sup>13</sup>C NMR and HPLC charts of **9**.

**Table S1.** Time Dependence of Ee Value of (aR)-(+)-**3b** at Various Temperatures

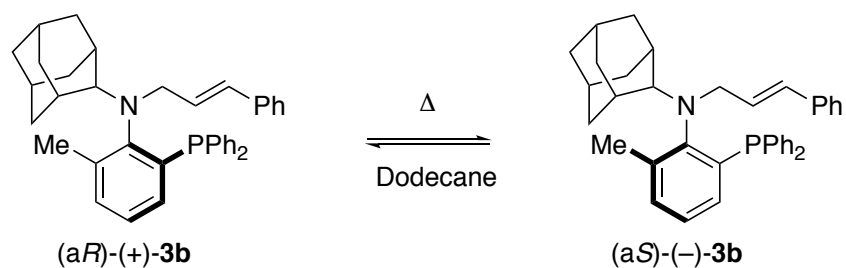

| Time (sec) | Ee (%) <sup>a</sup><br>at 30 °C | Ee (%) <sup>a</sup><br>at 40 °C | Ee (%) <sup>a</sup><br>at 50 °C | Ee (%) <sup>a</sup><br>at 60 °C |
|------------|---------------------------------|---------------------------------|---------------------------------|---------------------------------|
| 0          | 96.4                            | 96.4                            | 95.6                            | 97.2                            |
| 1800       | 94.7                            | 93.7                            | 84.2                            | 65.6                            |
| 3600       | 94.4                            | 90.7                            | 73.1                            | 48.5                            |
| 7200       | 92.7                            | 84.7                            | 55.9                            | 28.0                            |
| 14400      | 90.0                            | 75.2                            | 38.6                            | 7.8                             |
| 28800      | 84.5                            | 56.9                            | 14.5                            | -                               |
| 86400      | 67.5                            | 18.0                            | -                               | -                               |

<sup>a</sup> Ee was determined by chiral HPLC analysis.

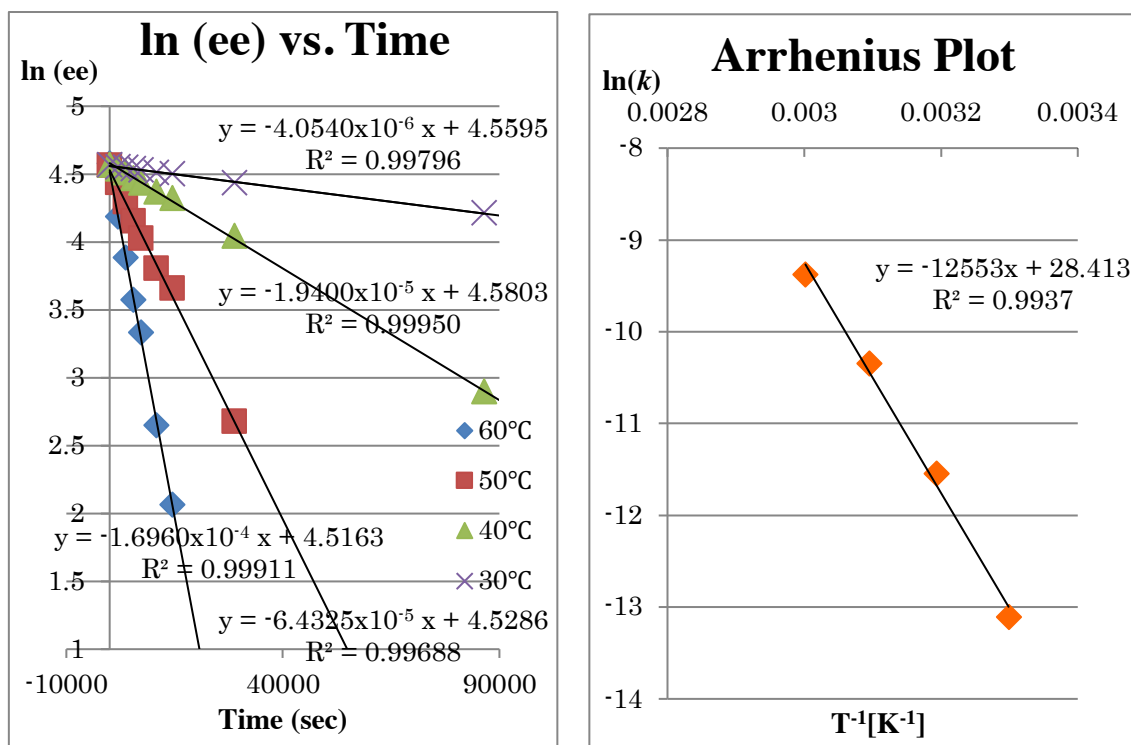

**Figure S1.** Data for the Racemization and Arrhenius Plot of (aR)-(+)-**3b**

**Table S2.** Time Dependence of Ee Value of (aR)-(-)-**3c** at Various Temperatures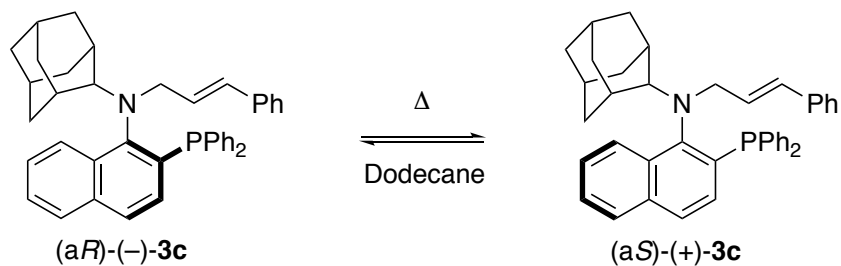

| Time (sec) | Ee (%) <sup>a</sup><br>at 30 °C | Ee (%) <sup>a</sup><br>at 40 °C | Ee (%) <sup>a</sup><br>at 50 °C | Ee (%) <sup>a</sup><br>at 60 °C |
|------------|---------------------------------|---------------------------------|---------------------------------|---------------------------------|
| 0          | 91.9                            | 91.9                            | 92.3                            | 92.1                            |
| 1800       | 90.6                            | 85.5                            | 72.6                            | 45.6                            |
| 3600       | 89.1                            | 78.8                            | 57.0                            | 23.9                            |
| 7200       | 86.2                            | 67.5                            | 35.8                            | 7.0                             |
| 14400      | 81.2                            | 49.5                            | 13.4                            | -                               |
| 28800      | 71.2                            | 26.2                            | 2.4                             | -                               |
| 86400      | 42.5                            | -                               | -                               | -                               |

<sup>a</sup> Ee was determined by chiral HPLC analysis.

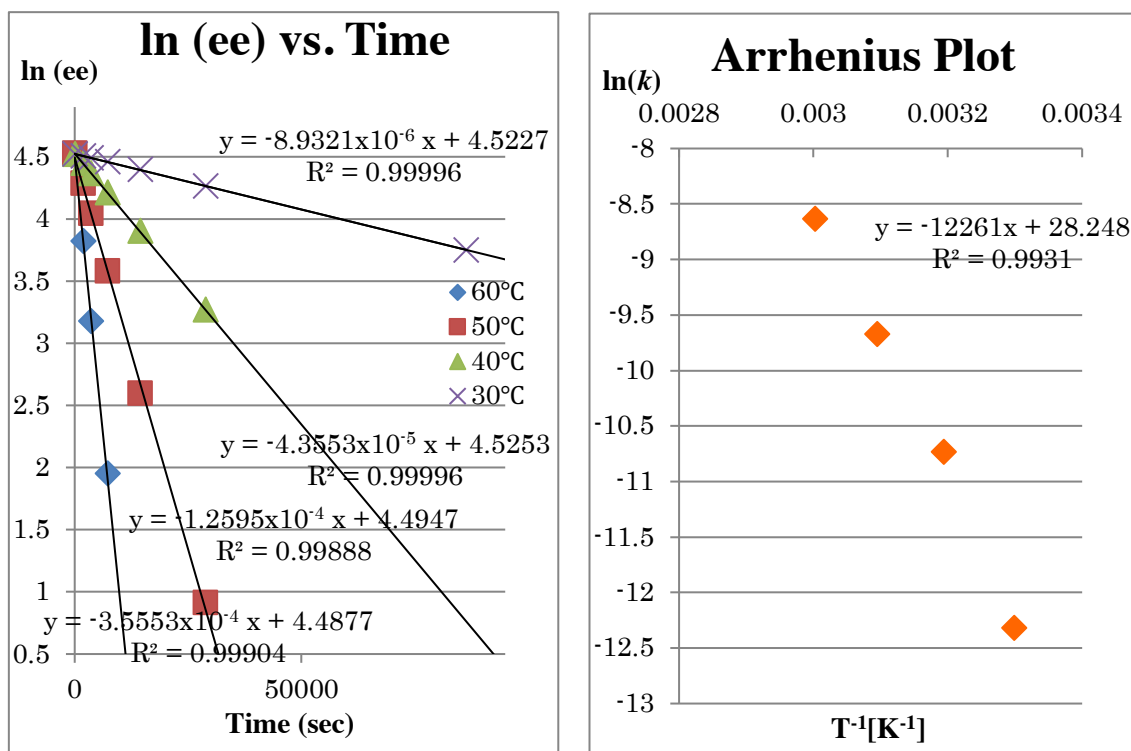**Figure S2.** Data for the Racemization and Arrhenius Plot of (aR)-(-)-**3c**

**Table S3.** Time Dependence of Ee Value of (-)-**3d** at Various Temperatures

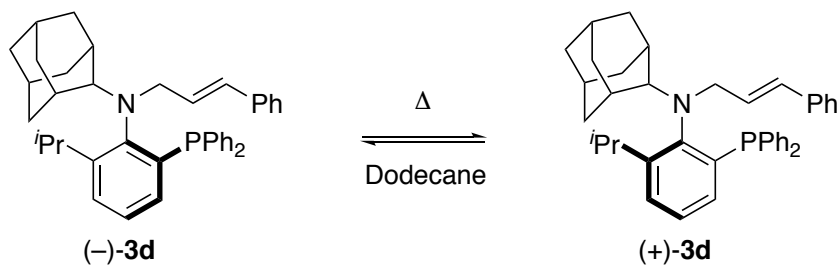

(-)-**3d**  $\xrightleftharpoons[\text{Dodecane}]{\Delta}$  (+)-**3d**

| Time (sec) | Ee (%) <sup>a</sup><br>at 40 °C | Ee (%) <sup>a</sup><br>at 50 °C | Ee (%) <sup>a</sup><br>at 60 °C | Ee (%) <sup>a</sup><br>at 70 °C |
|------------|---------------------------------|---------------------------------|---------------------------------|---------------------------------|
| 0          | 99.6                            | 98.8                            | 98.7                            | 98.7                            |
| 1800       | -                               | 96.8                            | 92.6                            | 77.3                            |
| 3600       | -                               | 94.7                            | 85.9                            | 59.3                            |
| 7200       | -                               | 90.9                            | 75.1                            | 37.0                            |
| 14400      | 94.2                            | 83.7                            | 58.5                            | 12.7                            |
| 28800      | 91.0                            | 71.5                            | 33.6                            | 2.1                             |
| 86400      | 75.9                            | -                               | -                               | -                               |

<sup>a</sup> Ee was determined by chiral HPLC analysis.

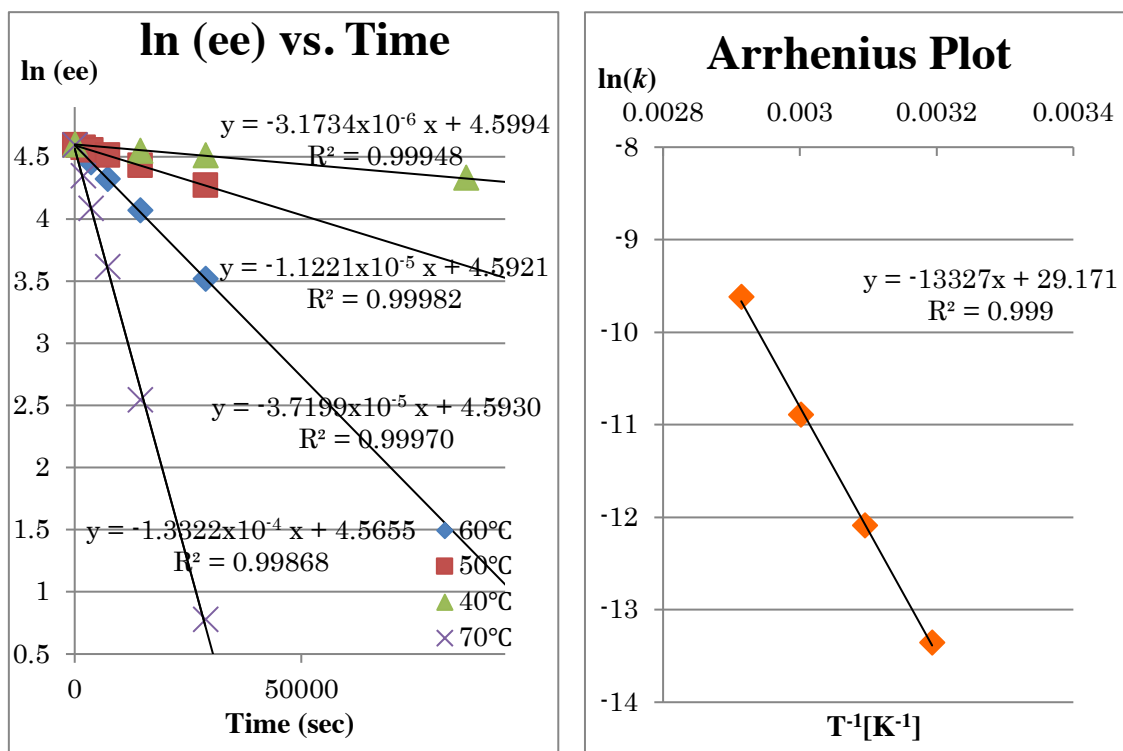**Figure S3.** Data for the Racemization and Arrhenius Plot of (-)-**3d**



<sup>1</sup>H, <sup>13</sup>C and <sup>31</sup>P NMR of 5

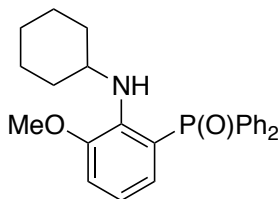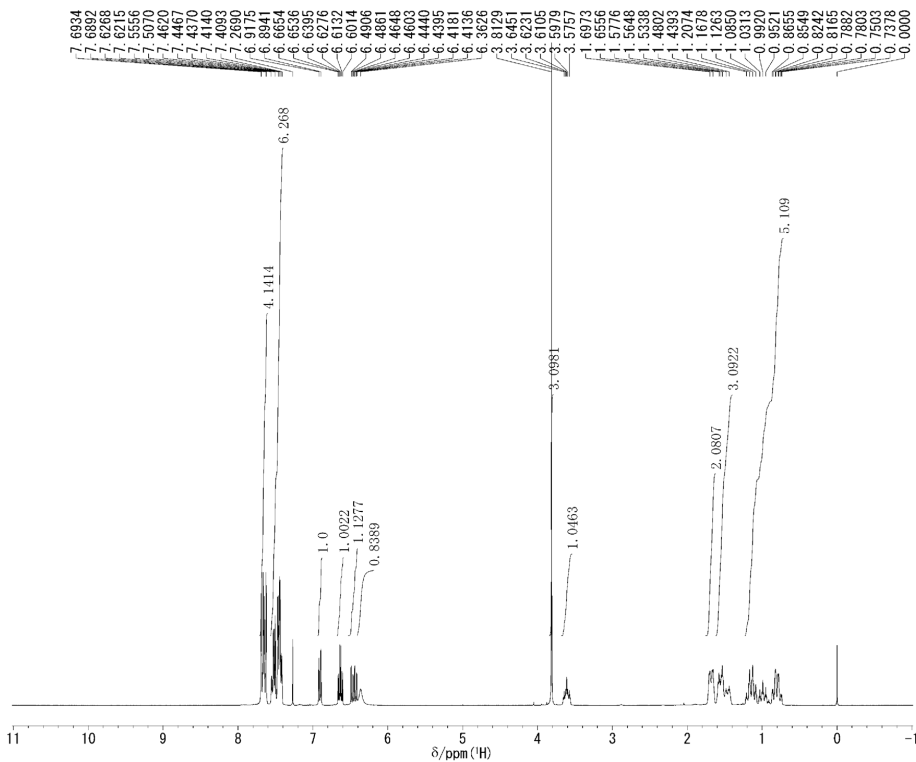

DFILE C:\KYOUSEI6\NMR\06MINO201  
6\21683\1\PP\DATA\1\111  
DATIM 05/Jan/2017 20:55:56  
COMNT

ORNUC <sup>1</sup>H  
EXMOD ZG30  
OBFRQ 300.23 MHz  
OBSET 0.0 kHz  
OBFIN 10004.57 Hz  
POINT 16384  
FREQU 3612.717 Hz  
SCANS 8  
ACQTM 4.5351 s  
PD 1.0 s  
Pw1 9.0 μs  
IRNUC OFF  
PROBHD 5 MM BBO BB-HI-D Z-GRD  
Z8284/01  
INSTRUM SPECT  
PULSPRG ZG30  
GRDPRG  
CTEMP 26.85 °C  
SLVNT CDCl<sub>3</sub>  
EXREF 0.0 ppm  
BF 0.25 Hz  
WINDOW Exponential  
RGAIN 228

Operator \_\_\_\_\_

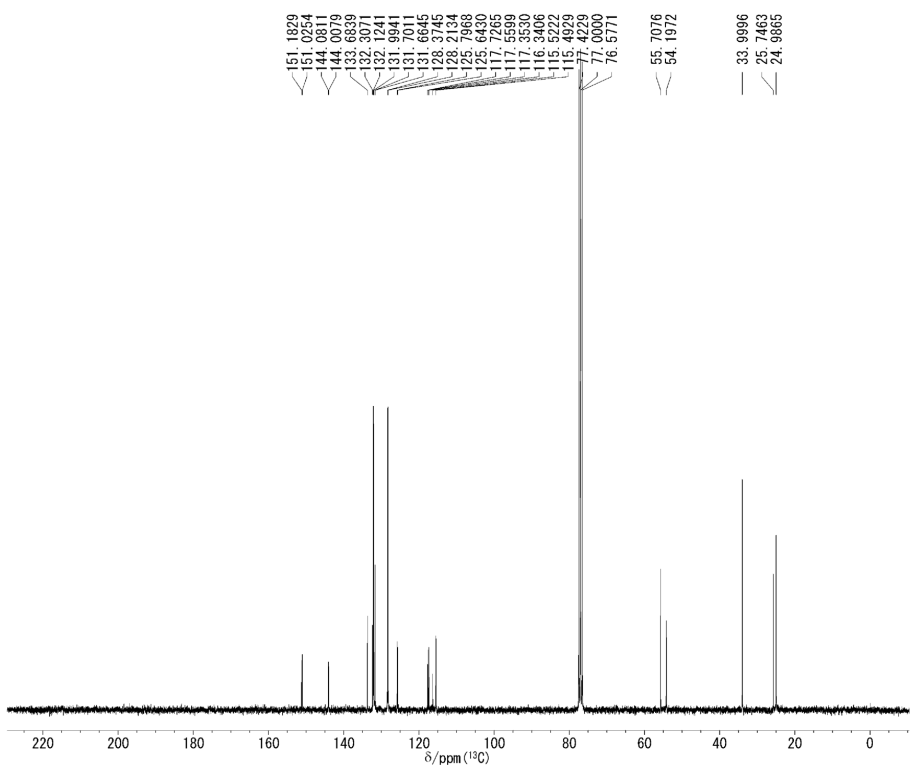

DFILE C:\KYOUSEI6\NMR\06MINO201  
6\21683\1\PP\DATA\1\111  
DATIM 05/Jan/2017 22:03:51  
COMNT

ORNUC <sup>13</sup>C  
EXMOD ZGPC30  
OBFRQ 75.49 MHz  
OBSET 0.0 kHz  
OBFIN 10003.96 Hz  
POINT 32768  
FREQU 18115.94 Hz  
SCANS 1024  
ACQTM 1.5088 s  
PD 2.0 s  
Pw1 0.0 μs  
IRNUC OFF  
PROBHD 5 MM BBO BB-HI-D Z-GRD  
Z8284/01  
INSTRUM SPECT  
PULSPRG ZGPC30  
GRDPRG  
CTEMP 26.85 °C  
SLVNT CDCl<sub>3</sub>  
EXREF 77.0 ppm  
BF 0.25 Hz  
WINDOW Exponential  
RGAIN 2299

Operator \_\_\_\_\_

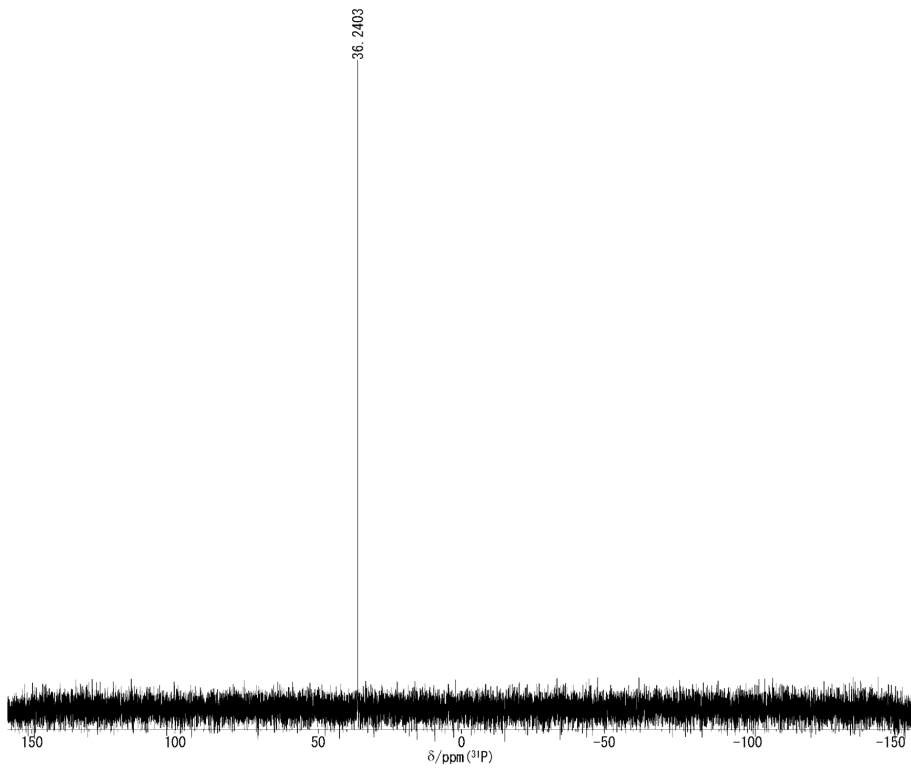

DFILE C:\KYOUSEI6\NMR\06MINO201  
 7Y22967P\1P\DATA\H111  
 DATIM 13/Apr/2018 15:27:41  
 COMNT

ORNUC <sup>1</sup>H  
 EXMOD ZPG30  
 OBFQ 121.54 MHz  
 QBET 0.0 kHz  
 OFIN 10005.0 Hz  
 POINT 32768  
 FREQ 38535.64 Hz  
 SCANS 8  
 ACQTM 0.8503 s  
 PD 8.0 s  
 PFI 0.0  $\mu$ s  
 INNUC OFF  
 PROBLD 5 MM BBO BB-HF-D Z-GRD  
 Z8284/01  
 INSTRM SPECT  
 PULSPRG ZPG30  
 GRDPRG  
 CTEMP 26.85  $^{\circ}$ C  
 SLANT CDL  
 EXREF 198.537 pp  
 m  
 BF 0.25 Hz  
 WINDOW Exponential  
 RGAIN 13004

Operator \_\_\_\_\_

<sup>1</sup>H, <sup>13</sup>C and <sup>31</sup>P NMR of 6

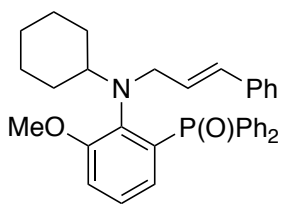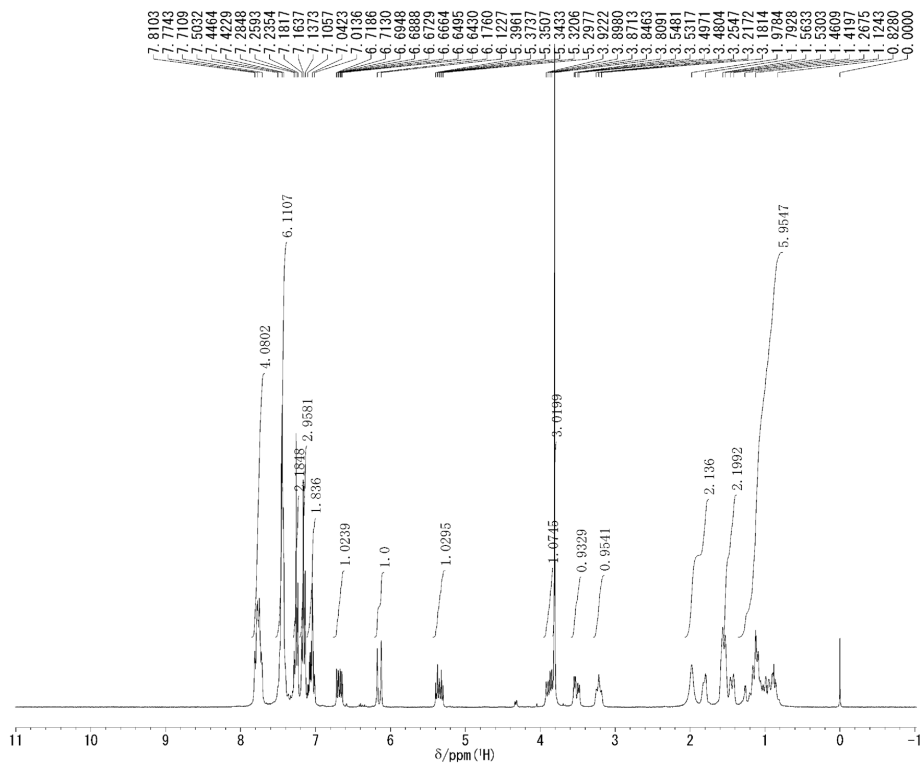

```

DFILE C:\KYOUSEI6\NMR\60MIN0201
6\21394\H1\PPDATA\1111
DATIM 05/Oct/2016 22:34:23
COMNT
=====
OBNUC 1H
EXMOD ZG30
OBFREQ 300.23 MHz
OBSET 0.0 kHz
OBFIN 10004.67 Hz
POINT 16384
FREQU 3612.717 Hz
SCANS 8
ACQTM 4.5351 s
PD 1.0 s
P41 9.0 us
IRNUC OFF
PROBHD 5 MM BBO BB-HI-D Z-GRD
ZS284/01
INSTRUM SPECT
PULSPRG ZG30
GRDPRG
CTEMP 20.01 C
SLANT CDCL3
EXREF 0.0 ppm
BF 0.25 Hz
WINDOW Exponential
RGAIN 256
Operator
    
```

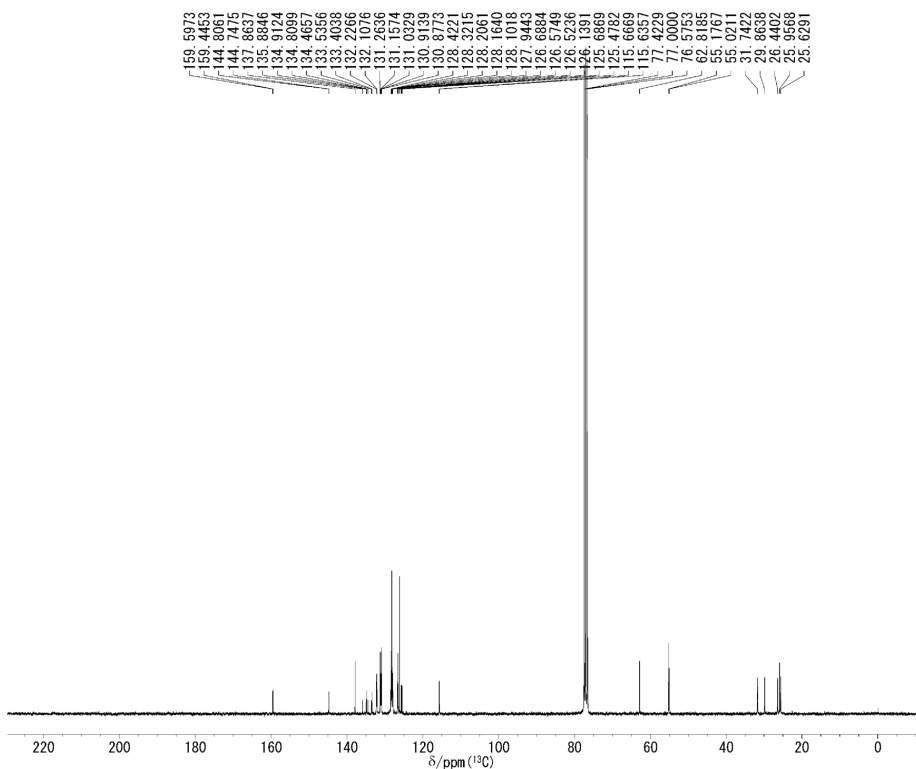

```

DFILE C:\KYOUSEI6\NMR\60MIN0201
6\21394\13C\PPDATA\1111
DATIM 14/Oct/2016 08:36:33
COMNT
=====
OBNUC 13C
EXMOD ZGPG30
OBFREQ 75.49 MHz
OBSET 0.0 kHz
OBFIN 10003.06 Hz
POINT 32768
FREQU 18115.94 Hz
SCANS 7168
ACQTM 1.8088 s
PD 2.0 s
P41 6.0 us
IRNUC OFF
PROBHD 5 MM BBO BB-HI-D Z-GRD
ZS284/01
INSTRUM SPECT
PULSPRG ZGPG30
GRDPRG
CTEMP 20.01 C
SLANT CDCL3
EXREF 77.0 ppm
BF 0.25 Hz
WINDOW Exponential
RGAIN 1626
Operator
    
```

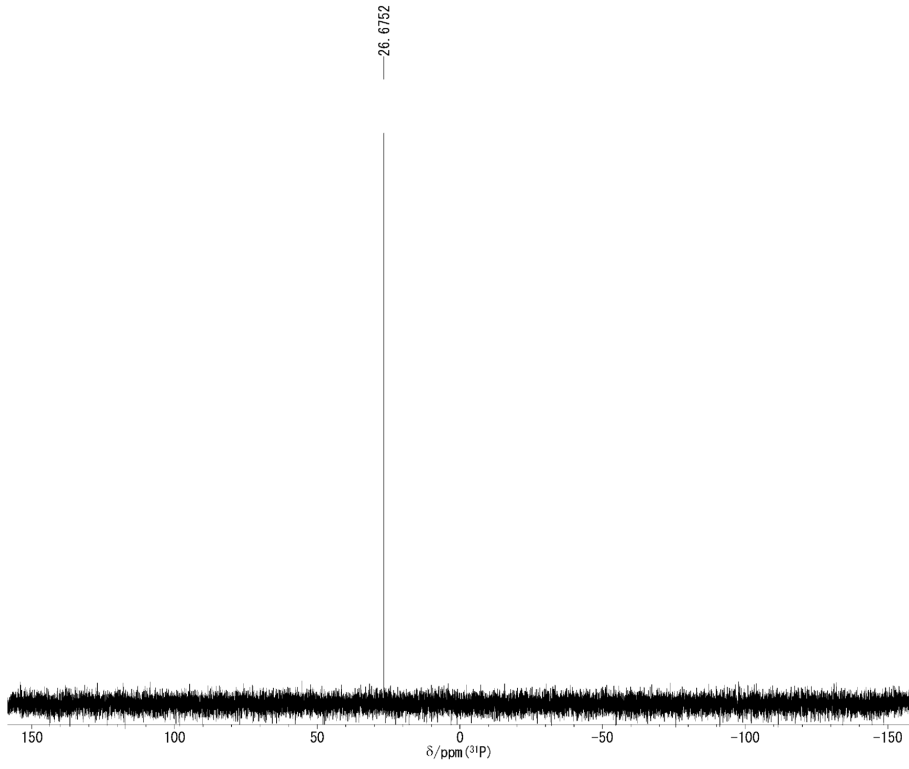

DFILE C:\KYOUSEI\NMR\Y06MINO201  
 7Y22667PY2YDATA\Y1V11  
 DATIM 13/Apr/2018 15:36:34  
 COMNT

ORNUC mp  
 EXMOD ZPG30  
 ORFREQ 121.54 MHz  
 ORSET 0.0 kHz  
 ORFIN 10005.0 Hz  
 POINT 32768  
 FREQU 38535.64 Hz  
 SCANS 8  
 ACQTM 0.8503 s  
 PD 8.0 s  
 PFI 0.0  $\mu$ s  
 TRNUC OFF  
 PROBRID 5 MM BBO BB-1H-D Z-GRD  
 Z8284/01  
 INSTRUM SPECT  
 PULSPRG ZPG30  
 GRDPRG  
 CTEMP 26.85  $^{\circ}$ C  
 SLVNT CDCL<sub>3</sub>  
 EXREF 158.537 pp  
 m  
 BF 0.25 Hz  
 WINDOW Exponential  
 RSAIN 13094

Operator \_\_\_\_\_



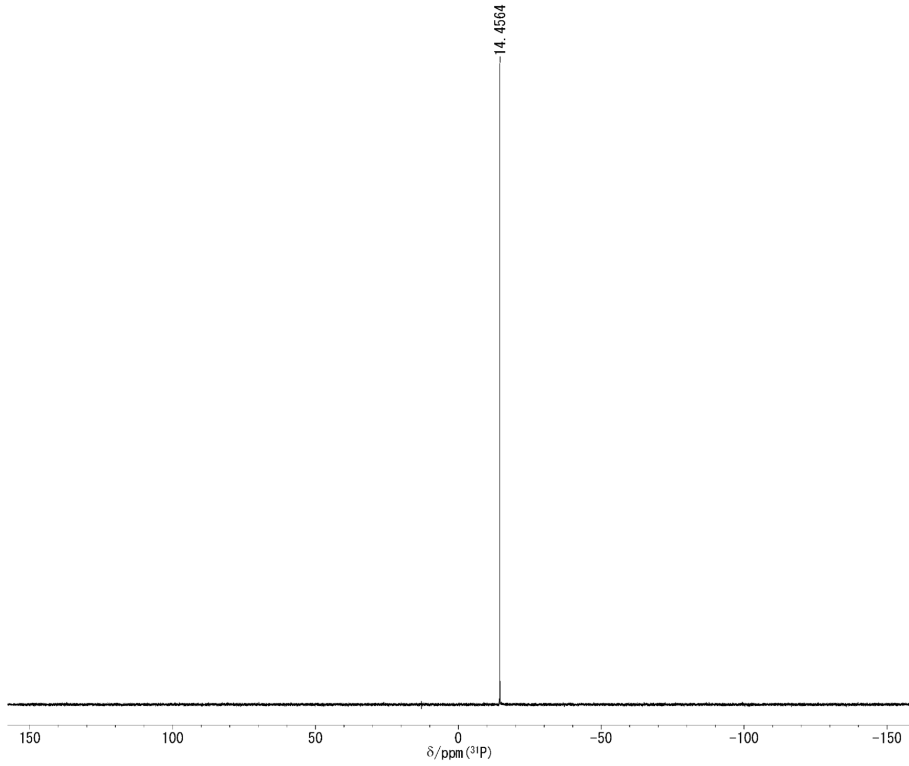

```

D:\FILE C:\YKYOUSEI6\MRV06MINO201
8Y22668P1Y1PDATA1Y111
DATEM 18/Apr/2018 13:10:50
COMNT

OBNUC 1H
EXMOD ZGPC30
OBFREQ 121.54 MHz
OBSET 0.0 MHz
OBFIN 10005.0 Hz
POINT 32768
FREQ 38535.64 Hz
SCANS 8
ACQTM 0.8503 s
PD 8.0 s
PW 0.0 μs
IRNUC OFF
PROBHD 5 MM BBO BB-HI-D Z-GRD
Z8284/01
INSTRUM SPECT
PULSPROG ZGPC30
GRDPRG
CTEMP 26.85 °C
SLVNT CDCl3
EXPRE 197.7821 p
pm
BF 0.25 Hz
WINDOW Exponential
RGAIN 11585

Operator _____

```

<sup>1</sup>H, <sup>13</sup>C and <sup>31</sup>P NMR of **7a**

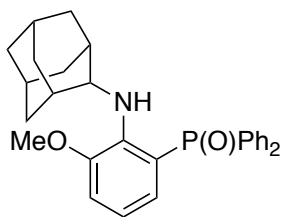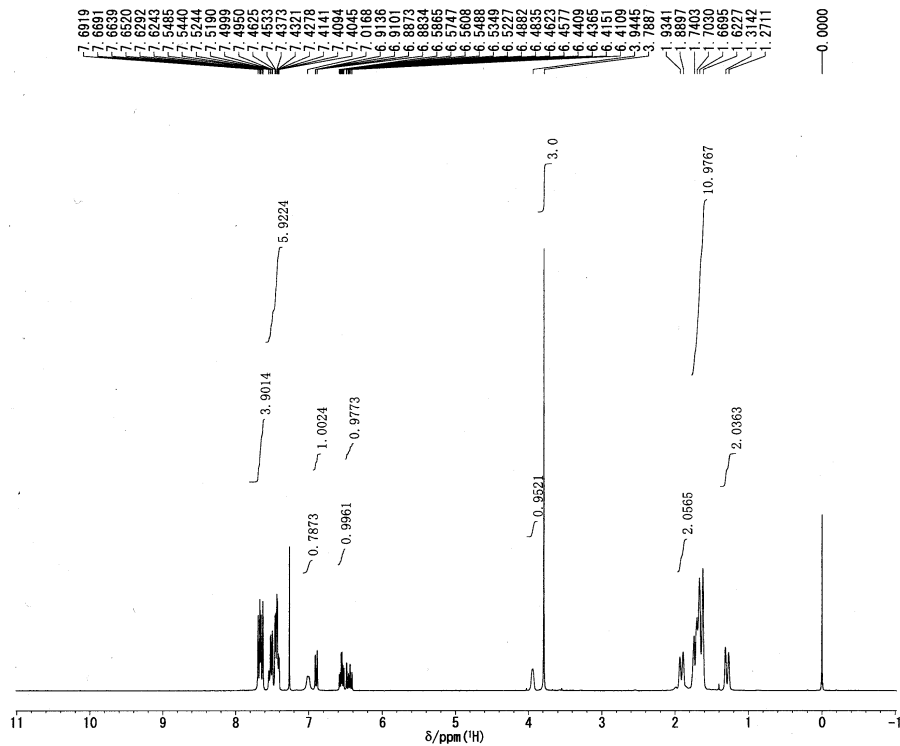

```

DFILE C:\KYOUSEI6\NMR\VO6MIN020
15V20423\F2VPDATA\F1V11
DATIM 11/Sep/2015 19:35:35
COMNT
OBNUC 1H
EXMOD ZG30
OBFRQ 300.23 MH
z
OBSET 0.0 kHz
OBFIN 10004.57 Hz
POINT 16384
FREQU 3612.717 H
s
SCANS 8
ACQTM 4.5351
PD 1.0 s
PW1 9.0 μs
IRNLC OFF
PROBHD 5 MM BBO BB-1H-D Z-GR
D Z8284/01
INSTRUM SPECT
PULSPRG ZG30
GRDPRG
CTEMP 26.85 °C
SLVNT CDCl3
EXREF 0.0 ppm
BF 0.25 Hz
WINDOW Exponential
RGAIN 362
Operator
    
```

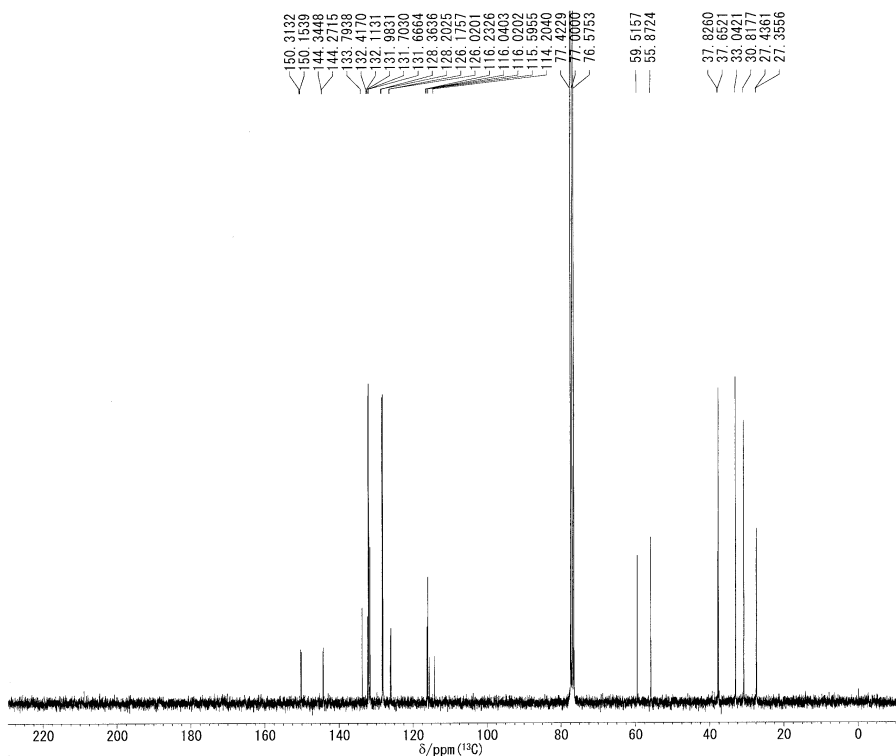

```

DFILE C:\KYOUSEI6\NMR\VO6MIN020
16V21160C\1VPDATA\F1V11
DATIM 15/Jul/2016 21:36:03
COMNT
OBNUC 13C
EXMOD ZPG30
OBFRQ 75.49 MH
z
OBSET 0.0 kHz
OBFIN 10003.06 Hz
POINT 32768
FREQU 18115.94 Hz
SCANS 1024
ACQTM 1.8088
PD 2.0 s
PW1 0.0 μs
IRNLC OFF
PROBHD 5 MM BBO BB-1H-D Z-GR
D Z8284/01
INSTRUM SPECT
PULSPRG ZPG30
GRDPRG
CTEMP 20.01 °C
SLVNT CDCl3
EXREF 77.0 ppm
BF 0.25 Hz
WINDOW Exponential
RGAIN 2048
Operator
    
```

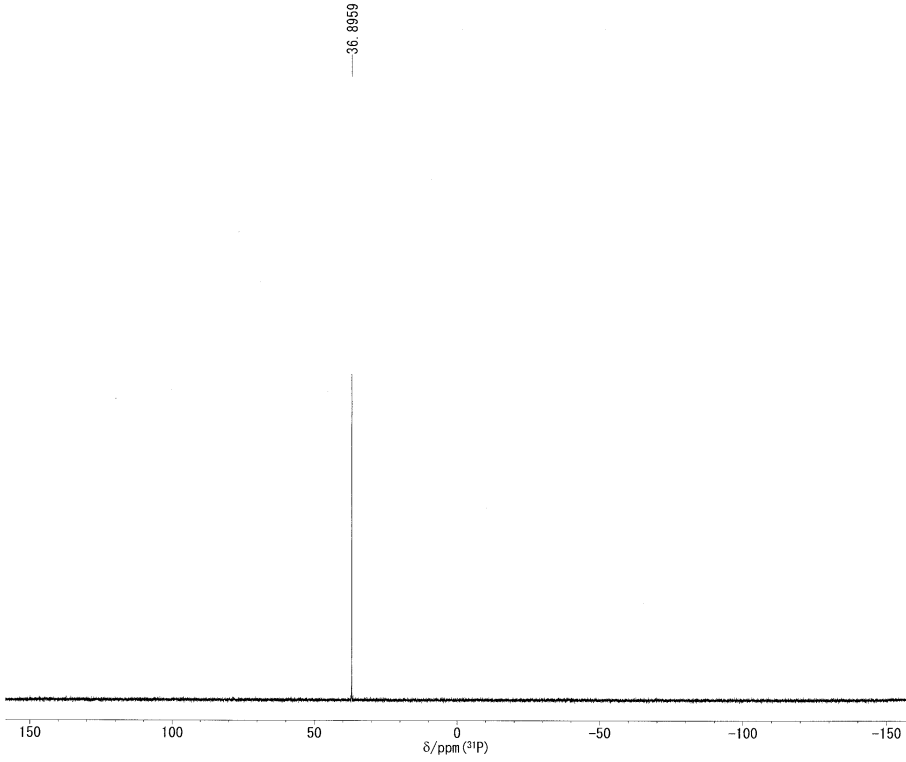

```

D:\FILE C:\YK\OUSE16\MR\Y06\MIN020
15Y20423PE2VPDATA\Y1\11
DATEM 11/Sep/2015 19:37:39
COMBT
OBNUC 31P
EXMOD ZGPG30
OBFRQ 121.54 MH
Z
OBSET 0.0 kHz
OBFIN 10005.0 Hz
POINT 32768
PREQU 38535.64 Hz
SCANS 8
ACQTM 0.8503
s
PD 8.0 s
PW1 0.0 μs
FRNUC OFF
PROBHD 5 MM BBO BB-1H-D Z-GR
D 28284/01
INSTRUM SPECT
PULSPROG ZGPG30
GRDPROG
CTEMP 26.85 °C
SLVNT CDCl3
EXREF 158.537 p
pm
BF 0.25 Hz
WINDOW Exponential
RGAIN 11885
Operator _____

```



<sup>1</sup>H, <sup>13</sup>C and <sup>31</sup>P NMR of **7b**

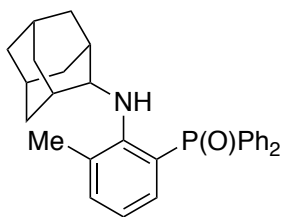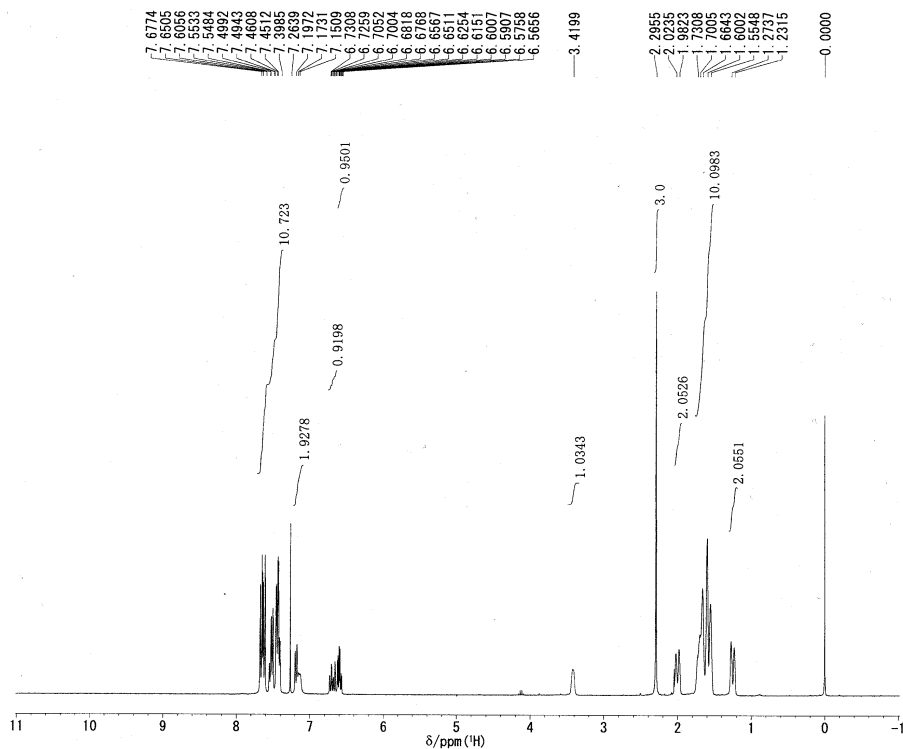

DFILE C:\KYOUSEI6\NMR\G6M1NO20  
14V19893HV1\VPDATA\AV1\11  
DATIM 12/Dec/2014 15:03:57  
COMNT

OBNUC <sup>1</sup>H  
EXMOD ZG30  
OBFRQ 300.23 MH  
Z  
ORSET 0.0 kHz  
OBFIN 10004.57 Hz  
POINT 16384  
FREQU 3612.717 H  
SCANS 8  
ACQTM 4.5351  
PD 1.0 s  
PWI 9.0 μs  
IRNUC OFF  
PROBHD 5 MM BBO BB-1H-D Z-GR  
D Z8284/01  
INSTRUM SPECT  
PULSPRC ZG30  
GRDPRG  
CTEMP 26.85 °C  
SLVNT CDCl<sub>3</sub>  
EXREF 0.0 ppm  
BF 0.25 Hz  
WINDOW Exponential  
RGAIN 512  
Operator

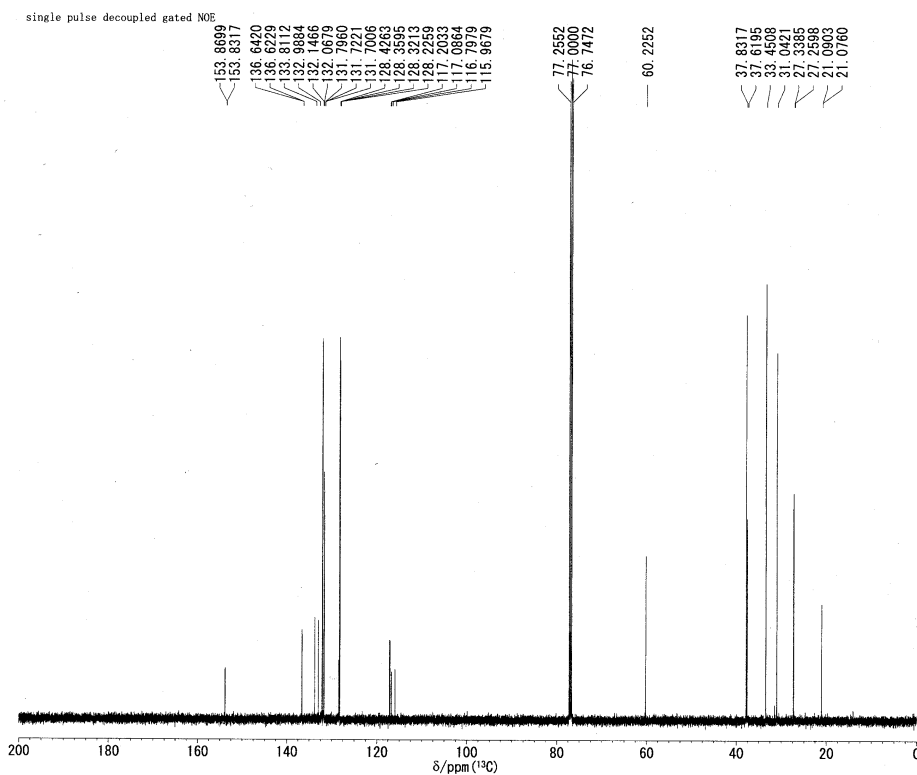

DEFILE C:\Users\kyousei6-win\NMR\K20150227\_obsawa\_ex  
p58\_Carbon-1-1\_jdf  
DATIM 27/Feb/2015 04:39:17  
COMNT

single pulse decoupled gated NOE  
OBNUC <sup>13</sup>C  
EXMOD carbon\_jxp  
OBFRQ 125.77 MH  
Z  
ORSET -5.0 kHz  
OBFIN 301.0403  
POINT 131072 (Zero F  
11: x4)  
FREQU 39908.18 Hz  
SCANS 321  
ACQTM 0.8336  
PD 2.0 s  
PWI 3.5333  
IRNUC <sup>1</sup>H  
PROBHD JNM-ECA500  
INSTRUM JNM-ECA500  
PULSPRC  
GRDPRG  
CTEMP 25.0 °C  
SLVNT CHLOROFORM-D  
EXREF 77.0 ppm  
BF 0.25 Hz  
WINDOW Exponential  
RGAIN 50  
Operator

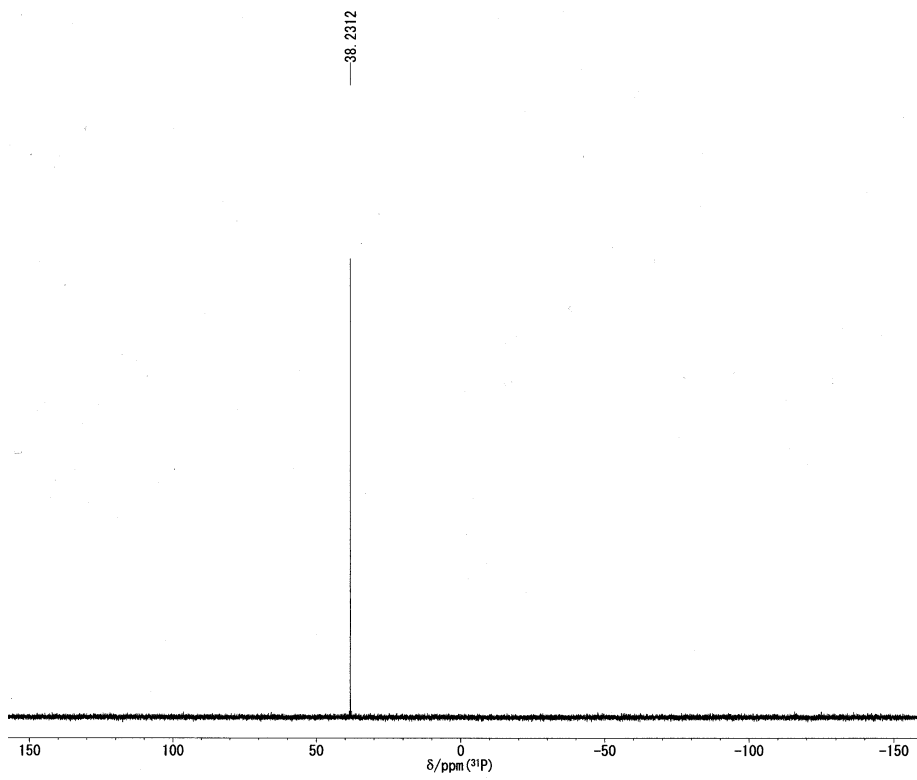

```

D:\FILE C:\KYOUSEI6NMRV06MINO20
L4\19893P\1\1\PDATAY1\11
DATIM 12/Dec/2014 15:09:28
COMNT

OBNUC 31P
EXMOD ZPG30
OBFRQ 121.54 MH
z
ORSET 0.0 kHz
ORFIN 10005.0 Hz
POINT 32768
FREQU 38535.64 Hz
SCANS 8
ACQTM 0.8503
s
PD 8.0 s
PWI 0.0 μs
IRNUC OFF
PROBHD 5 MM BBO BB-1H-D Z-GR
D 28284/01
INSTRUM SPECT
PULSPRG ZPG30
GRDPRG
CTEMP 26.85 °C
SUNVT CDCL4
EXREF 158.537 p
pm
BF 0.25 Hz
WINDOW Exponential
RGAIN 10321
Operator _____

```

<sup>1</sup>H, <sup>13</sup>C and <sup>31</sup>P NMR of 7c

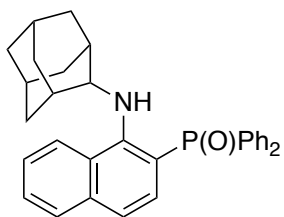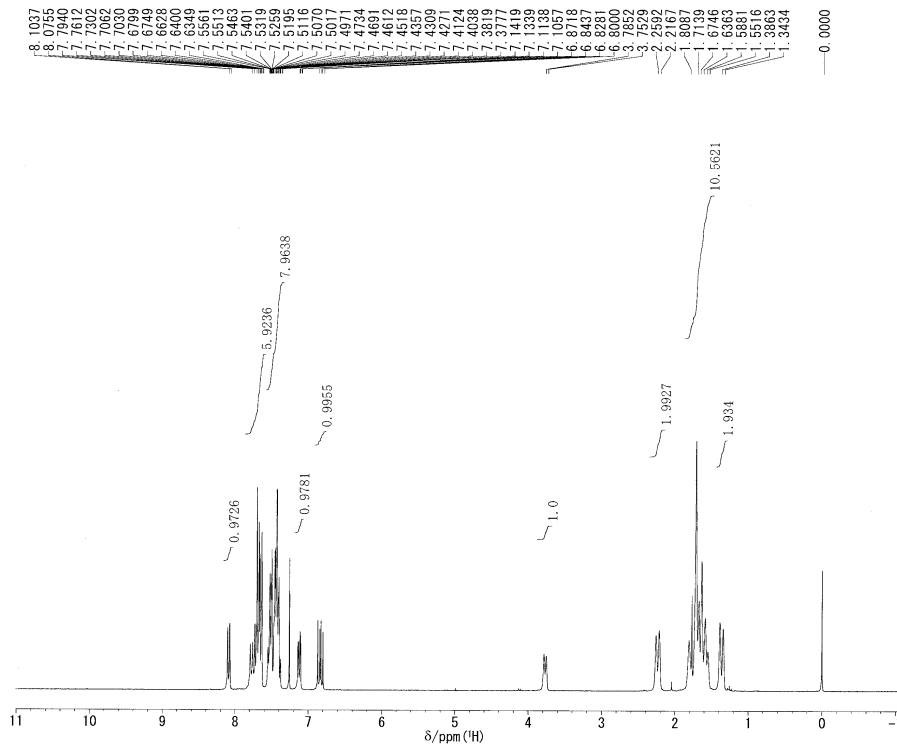

DFILE C:\KYOUSEI6\NMR\VO6MINO20  
16Y21244Y1\VPDATA\Y1\1  
DATIM 19/Aug/2016 19:59:46  
COMNT

OBNUC <sup>1</sup>H  
EXMOD ZG30  
OBFRQ 300.23 MH  
z  
ORSET 0.0 kHz  
OBFIN 10004.57 Hz  
POINT 16384  
FREQ 3612.717 H  
z  
SCANS 8  
ACQTM 4.5351  
s  
PD 1.0 s  
PW 9.0 μs  
IRNUC OFF  
PROBHD 5 MM BBO BB-1H-D Z-GR  
D 28284/01  
INSTRM SPECT  
PULSPRG ZG30  
GRDPRG  
CTEMP 21.01 °C  
SLVT  
EXREF 0.0 ppm  
BF 0.25 Hz  
WINDOW Exponential  
RGAIN 287

Operator \_\_\_\_\_

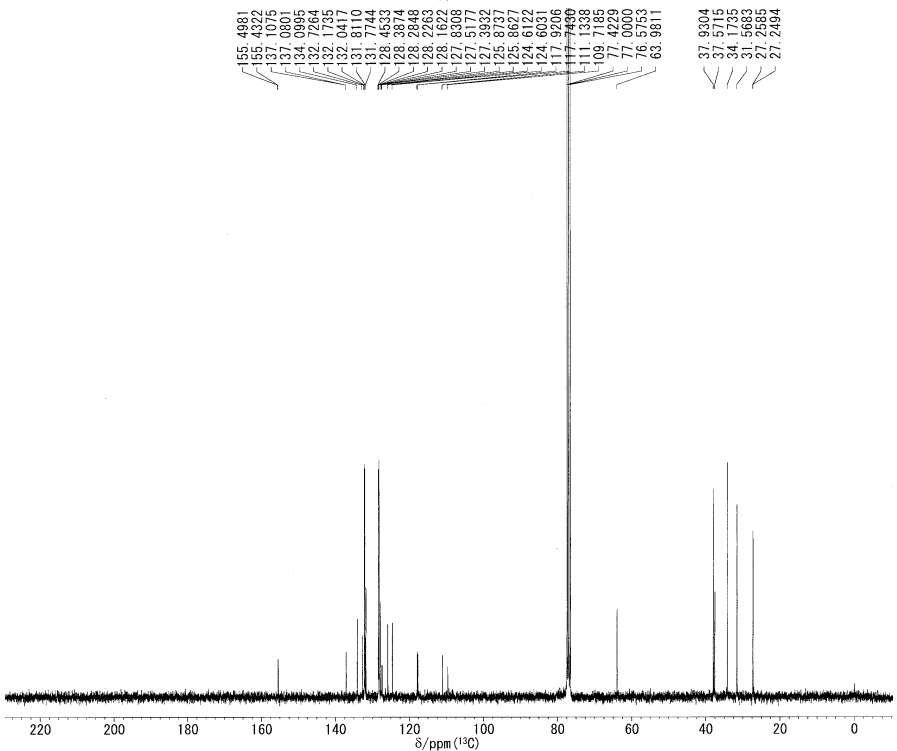

DFILE C:\KYOUSEI6\NMR\VO6MINO20  
16Y21244Y1\VPDATA\Y1\1  
DATIM 19/Aug/2016 21:07:01  
COMNT

OBNUC <sup>13</sup>C  
EXMOD ZGPC30  
OBFRQ 75.49 MH  
z  
ORSET 0.0 kHz  
OBFIN 10003.06 Hz  
POINT 32768  
FREQ 18115.94 Hz  
SCANS 1024  
ACQTM 1.8088  
s  
PD 2.0 s  
PW 0.0 μs  
IRNUC OFF  
PROBHD 5 MM BBO BB-1H-D Z-GR  
D 28284/01  
INSTRM SPECT  
PULSPRG ZGPC30  
GRDPRG  
CTEMP 21.01 °C  
SLVT ACETON  
EXREF 77.0 ppm  
BF 0.25 Hz  
WINDOW Exponential  
RGAIN 2299

Operator \_\_\_\_\_

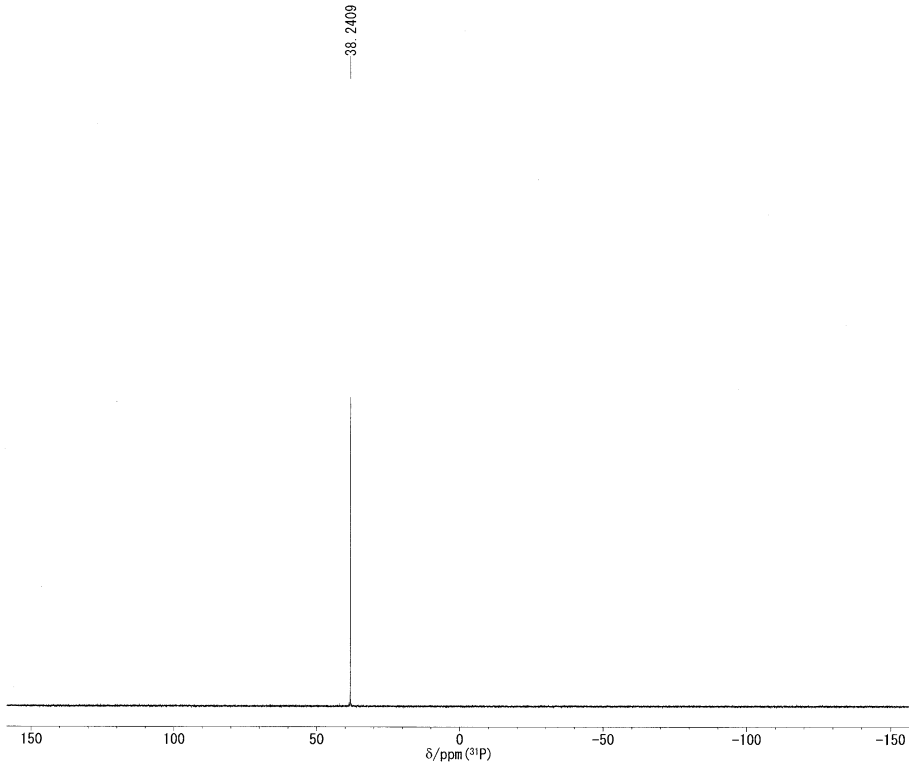

```

DFILE C:\XYOUSE16\MRV06M1N020
15V20221P\1YPPDATA\1Y111
DATIM 29/May/2015 17:36:39
COMNT
OBNUC 31P
EXMOD ZFG30
OBFRQ 121.54 MH
Z
OBSET 0.0 kHz
OBFIN 10005.0 Hz
POINT 32768
FREQU 38535.64 Hz
SCANS 8
ACQTM 0.8503
S
PD 8.0 s
PWI 0.0 μs
TRNUC OFF
PROBHD 5 MM BBO BB-1H-D Z-GR
D Z8284/01
INSTRUM SPECT
PULSPRG ZFG30
GRDPRG
CTEMP 26.85 °C
SLVMT CDCL3
EXREF 158.537 p
pm
BF 0.25 Hz
WINDOW Exponential
RGAIN 11985
Operator _____

```

<sup>1</sup>H, <sup>13</sup>C and <sup>31</sup>P NMR of 7d

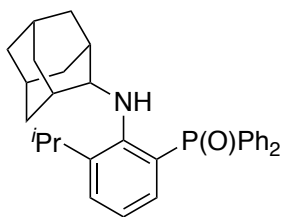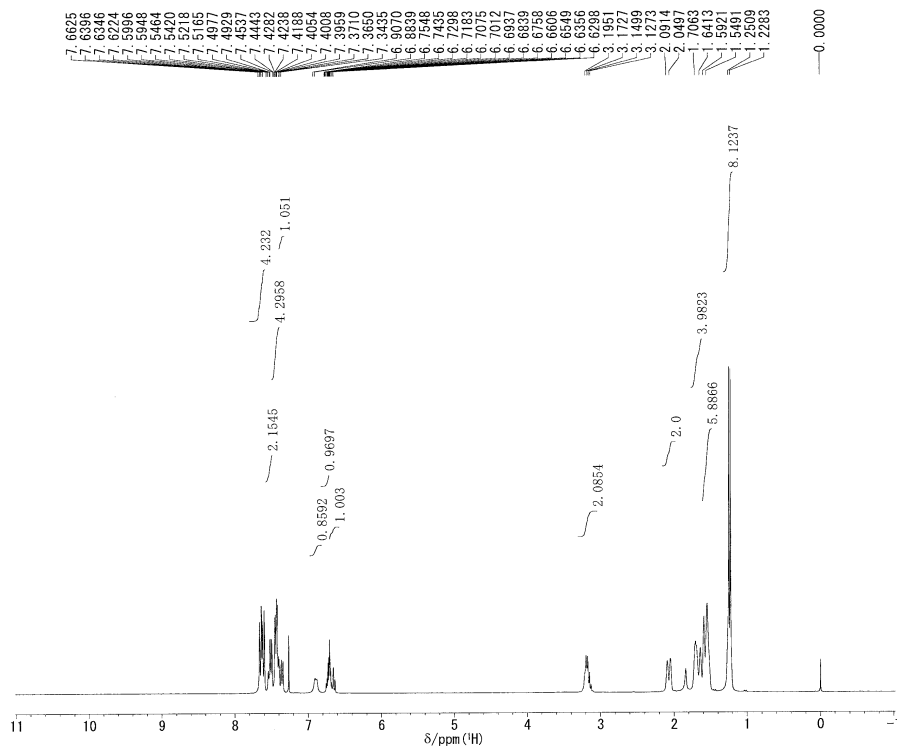

```

DFILE C:\YKYOUSE16\NMR\06MINO20
16V21501HV1\VPDATA\Y1V11
DATEM 31/Oct/2016 19:08:35
COMNT
=====
OBNUC 1H
EXM0D ZG30
OBFRQ 300.23 MH
=====
Z
OBSET 0.0 kHz
OBFIN 10004.57 Hz
POINT 16384
FREQU 3612.717 H
=====
SCANS 16
ACQTM 4.5351
=====
PD 1.0 s
PW1 9.0 μs
IRNUC OFF
PROBHD 5 MM BBO BB-1H-D Z-GR
D Z8284/01
=====
INSTRUM SPECT
PULSPRG ZG30
GRDPRG
CTEMP 26.85 °C
SLVNT CDCl3
EXREF 8.0 ppm
BF 0.25 Hz
WINDOW Exponential
RGAIN 362
Operator _____
    
```

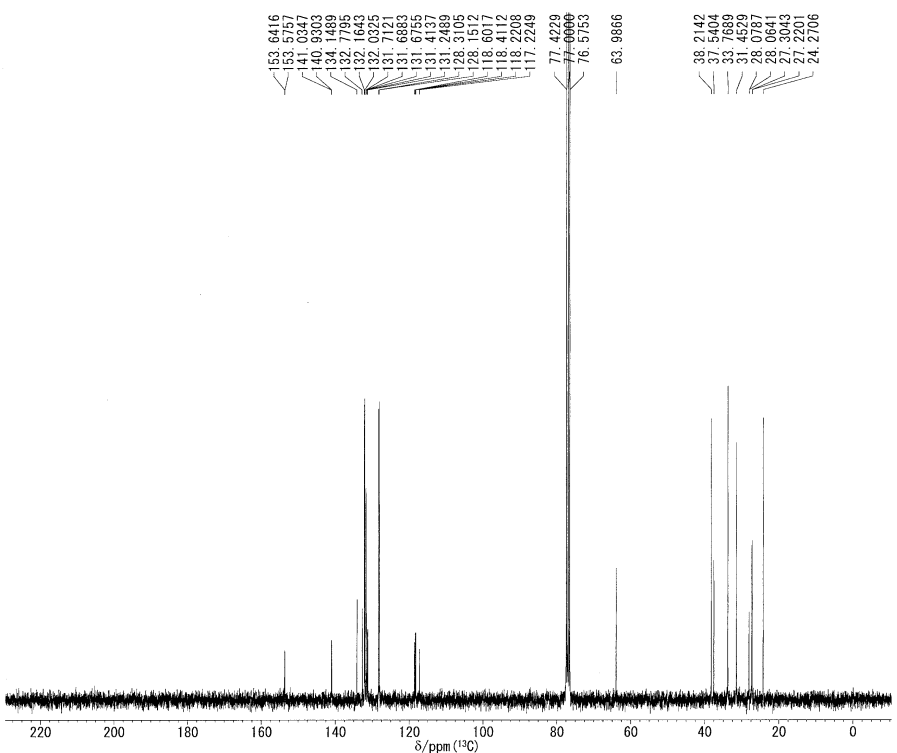

```

DFILE C:\USERS\YKYOUSE16\WIND
ESKTOP\EB15\WAY21501V21501C
1\VPDATA\Y1V11
DATEM 31/Oct/2016 20:55:46
COMNT
=====
OBNUC 13C
EXM0D ZGPG30
OBFRQ 75.49 MH
=====
Z
OBSET 0.0 kHz
OBFIN 10003.06 Hz
POINT 32768
FREQU 18115.94 Hz
SCANS 1024
ACQTM 1.8088
=====
PD 2.0 s
PW1 0.0 μs
IRNUC OFF
PROBHD 5 MM BBO BB-1H-D Z-GR
D Z8284/01
=====
INSTRUM SPECT
PULSPRG ZGPG30
GRDPRG
CTEMP 26.85 °C
SLVNT CDCl3
EXREF 77.0 ppm
BF 0.25 Hz
WINDOW Exponential
RGAIN 3251
Operator _____
    
```

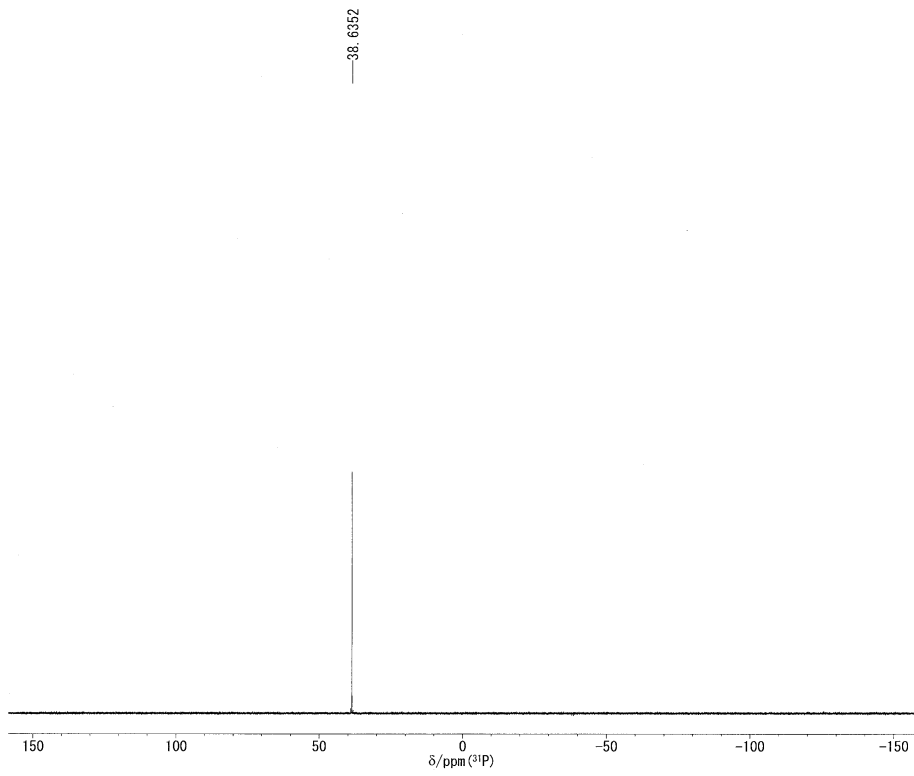

```

D:\FILE C:\KYOUSEI\6MMRY06M1N020
16Y21490P41Y1PDATAY1Y11
DATEM 27/Oct/2016 19:00:51
COMNT
OBNUC 1H
EXMOD ZPG30
GBFRQ 121.54 MH
Z
OBSET 0.0 kHz
OBFIX 10005.0 Hz
POINT 32768
PREQU 38535.64 Hz
SCANS 8
ACQTM 0.8503
s
PD 8.0 s
PWI 0.0  $\mu$ s
TRNUC 1H
PROBHD 5 MM BBO BB-1H-D Z-GR
D Z8284/01
INSTRUM SPECT
PULSPRG ZPG30
GRDPRG
CTEMP 26.85  $^{\circ}$ C
SLVNT CDCl3
EXREF 158.537 p
pm
BF 0.25 Hz
WINDOW Exponential
RGAIN 5793
Operator _____

```

<sup>1</sup>H, <sup>13</sup>C and <sup>31</sup>P NMR of **8a**

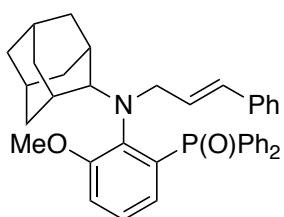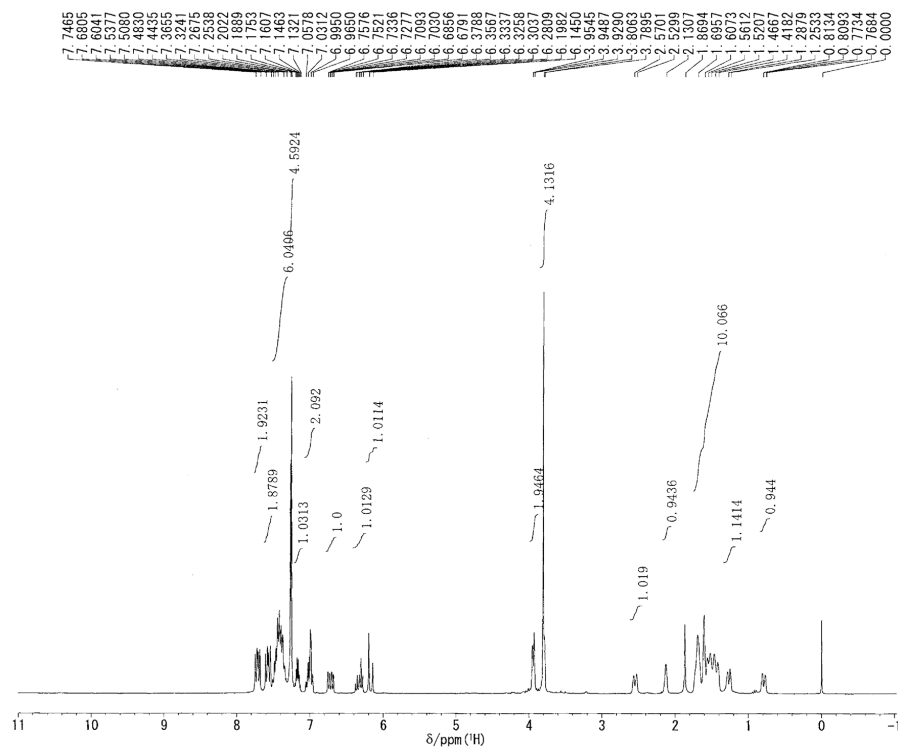

DFILE C:\YKHOUSE16\NMR\06MIN020  
16\21161HY1\PDATAY111  
DATIM 16/Jul/2016 13:35:29  
COMNT

OBNUC <sup>1</sup>H  
EXMOD ZG30  
OBFRQ 300.23 MH  
z  
OBSET 0.0 kHz  
OBFIN 10004.57 Hz  
POINT 16384  
FREQU 3612.717 H  
z  
SCANS 8  
ACQTM 4.5351  
s  
PD 1.0 s  
PWI 9.0 μs  
FNUC OFF  
PROBHD 5 MM BBO BB-1H-D Z-GR  
D Z8284/01  
INSTRUM SPECT  
PULSPRG ZG30  
GRDPRG  
CTEMP 20.01 °C  
SLNT CDCl<sub>3</sub>  
EXREF 0.0 ppm  
BF 0.25 Hz  
WINDOW Exponential  
RGAIN 181  
Operator

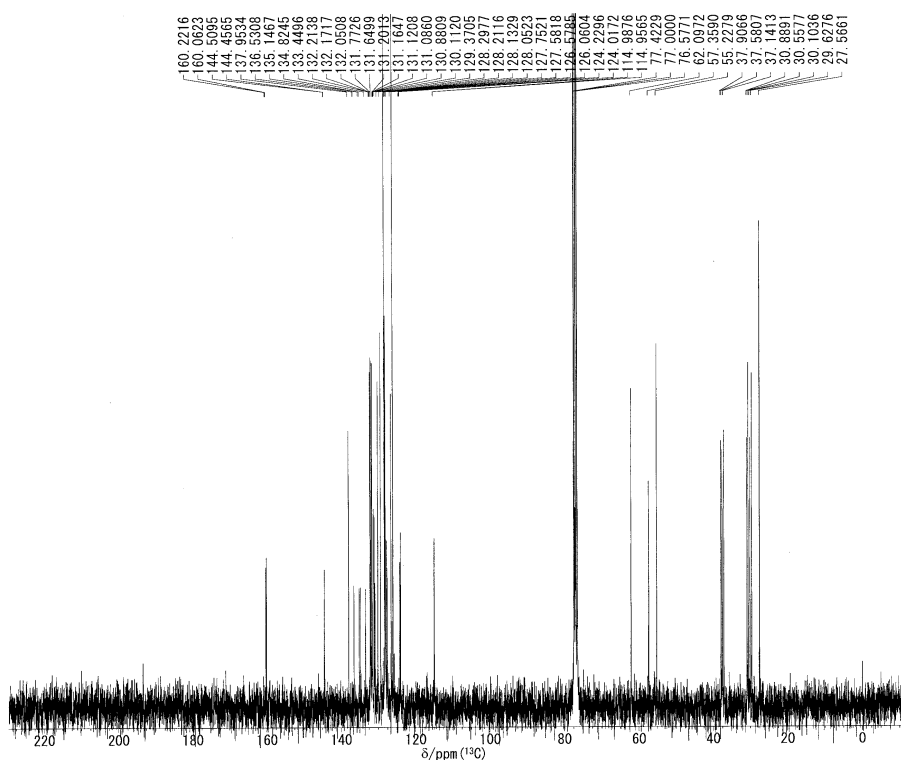

DFILE C:\YKHOUSE16\NMR\06MIN020  
16\21161CY1\PDATAY111  
DATIM 16/Jul/2016 14:42:29  
COMNT

OBNUC <sup>13</sup>C  
EXMOD ZGPG30  
OBFRQ 75.49 MH  
z  
OBSET 0.0 kHz  
OBFIN 10003.06 Hz  
POINT 32788  
FREQU 18115.94 Hz  
SCANS 1024  
ACQTM 1.8088  
s  
PD 2.0 s  
PWI 0.0 μs  
FNUC OFF  
PROBHD 5 MM BBO BB-1H-D Z-GR  
D Z8284/01  
INSTRUM SPECT  
PULSPRG ZGPG30  
GRDPRG  
CTEMP 20.01 °C  
SLNT CDCl<sub>3</sub>  
EXREF 77.0 ppm  
BF 0.25 Hz  
WINDOW Exponential  
RGAIN 2048  
Operator

—29.8128

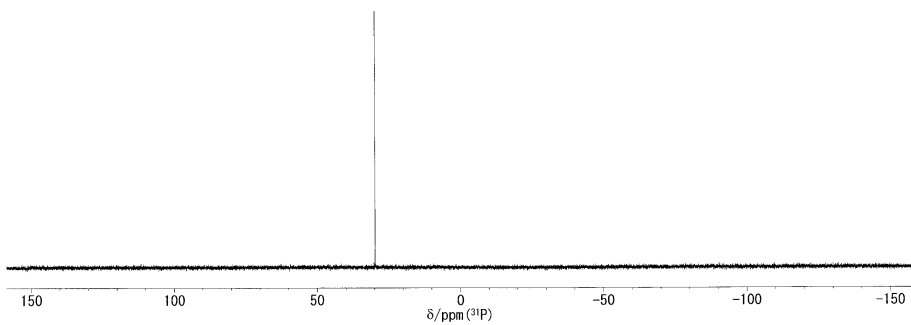

DFILE C:\KYOUSE16\MRV06\MIN020  
15420458P2\2PDATA\1V11  
DATIM 02/Oct/2015 18:03:17  
COMNT  
ORNUC <sup>13</sup>P  
EXMOD ZGPG30  
OBFRQ 121.54 MH  
Z  
OBSET 0.0 kHz  
ORFIN 10005.0 Hz  
POINT 32768  
FREQU 38535.64 Hz  
SCANS 8  
ACQTM 0.8503  
S  
PD 8.0 s  
PFI 0.0  $\mu$ s  
IRNUC OFF  
PROBHD 5 MM BBO BB-1H-D Z-GR  
D Z8284/01  
INSTRUM SPECT  
PULSPRG ZGPG30  
GRDPRG  
CTEMP 26.85  $^{\circ}$ C  
SLVNT CDCL<sub>2</sub>  
EXREF 158.537 p  
PM  
BF 0.25 Hz  
WINDOW Exponential  
RGAIN 13004  
Operator \_\_\_\_\_



<sup>1</sup>H, <sup>13</sup>C and <sup>31</sup>P NMR of **8b**

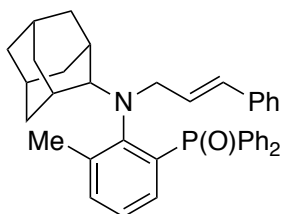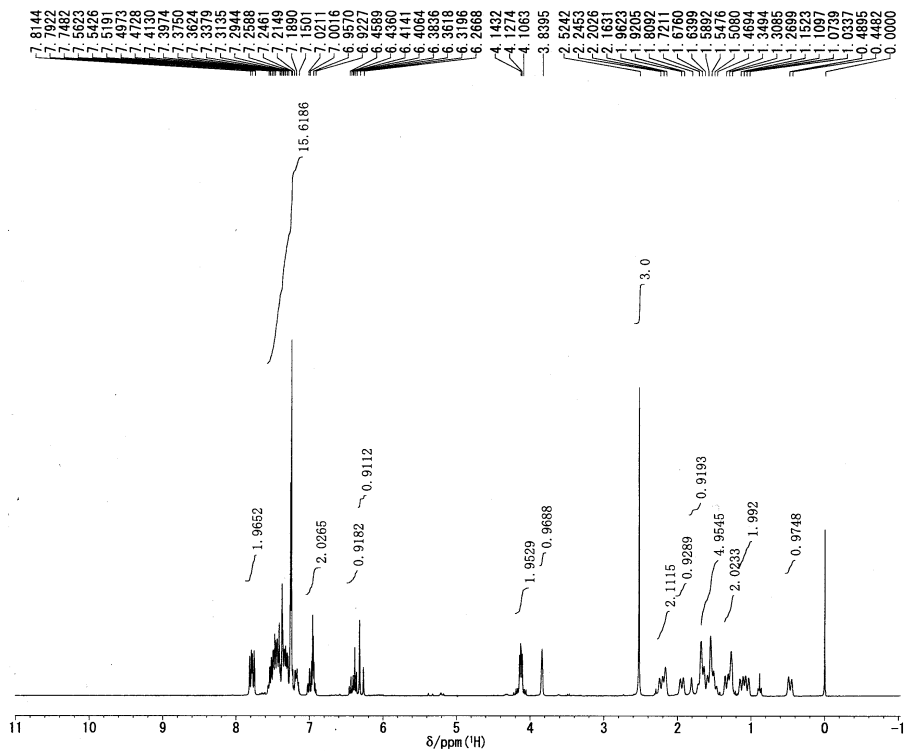

DFILE C:\KYOUSEI\6MRV06\INO20  
14\200509\1VPDATA\1V11  
DATIM 17/Feb/2015 17:58:33  
COMT

OBNUC <sup>1</sup>H  
EXMOD ZG30  
OBFRQ 300.23 MH  
Z  
OBSET 0.0 kHz  
OBFIN 10004.57 Hz  
POINT 16384  
FREQU 3612.717 H  
Z  
SCANS 8  
ACQTM 4.5351  
S  
PD 1.0 s  
PFI 9.0 μs  
IRNUC OFF  
PROBH 5 MM BBO BB-1H-D Z-GR  
D 28284/01  
INSTRUM SPECT  
PULSPRG ZG30  
GRDPRG  
CTEMP 26.85 °C  
SLVNT CDCl<sub>3</sub>  
EXREF 0.0 ppm  
BF 0.25 Hz  
WINDOW Exponential  
RGAIN 256

Operator \_\_\_\_\_

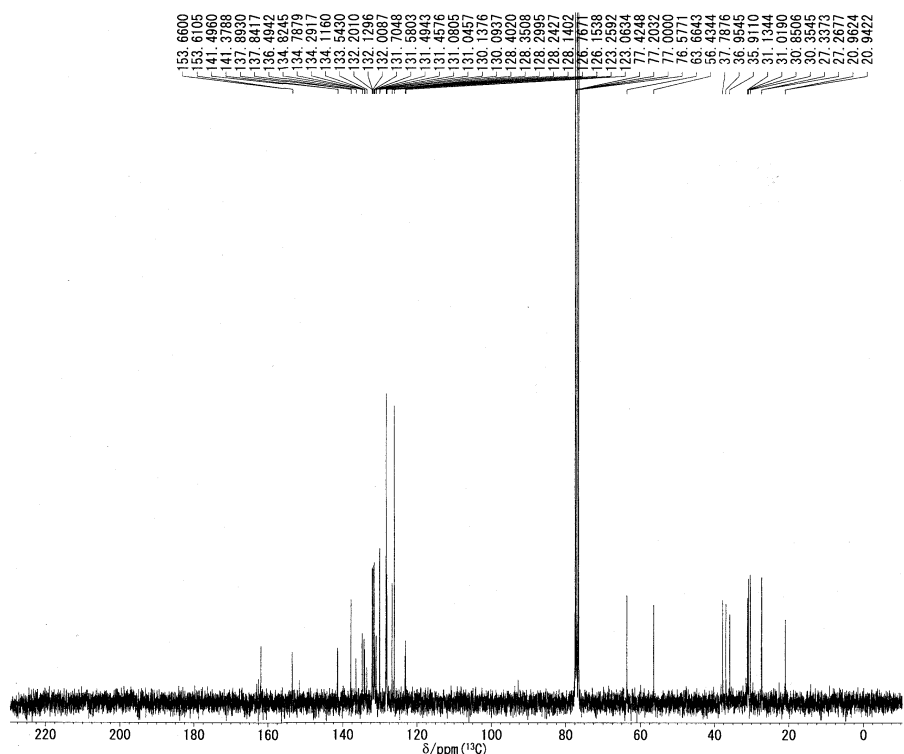

DFILE C:\KYOUSEI\6MRV06\INO20  
14\200509\1VPDATA\1V11  
DATIM 04/Mar/2015 16:38:33  
COMT

OBNUC <sup>13</sup>C  
EXMOD ZGPC30  
OBFRQ 75.49 MH  
Z  
OBSET 0.0 kHz  
OBFIN 10003.96 Hz  
POINT 32768  
FREQU 18115.94 Hz  
SCANS 512  
ACQTM 1.8088  
S  
PD 2.0 s  
PFI 0.0 μs  
IRNUC OFF  
PROBH 5 MM BBO BB-1H-D Z-GR  
D 28284/01  
INSTRUM SPECT  
PULSPRG ZGPC30  
GRDPRG  
CTEMP 26.85 °C  
SLVNT CDCl<sub>3</sub>  
EXREF 77.0 ppm  
BF 0.25 Hz  
WINDOW Exponential  
RGAIN 2048

Operator \_\_\_\_\_

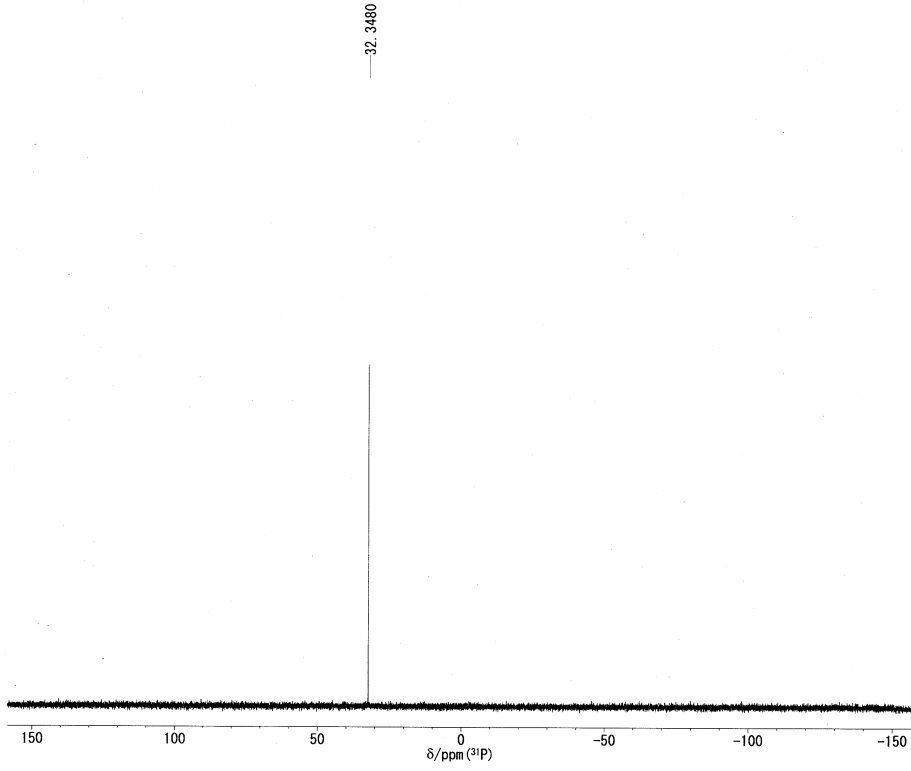

DFILE C:\KYOUSEI6\NRV06M1N020  
 14V19885PV1VDPDATAV1V11  
 DATIM 10/Dec/2014 21:30:35  
 COMNT  
 OBNUC <sup>13</sup>C  
 EXMOD ZFG30  
 OBFRQ 121.54 MH  
 Z  
 OBSET 0.0 kHz  
 OBFIN 10005.0 Hz  
 POINT 32768  
 FREQU 38535.64 Hz  
 SCANS 8  
 ACQTM 0.8503  
 s  
 PD 8.0 s  
 PW1 0.0 μs  
 TRNUC OFF  
 PROHD 5 MM BBO BB-1H-D Z-CR  
 D Z8284/01  
 INSTRUM SPECT  
 PULSPRG ZFG30  
 GRDPRG  
 CTEMP 26.85 °C  
 SLVNT CDCL<sub>4</sub>  
 EXREF 158.537 p  
 pm  
 BF 0.25 Hz  
 WINDOW Exponential  
 RGAIN 11985  
 Operator \_\_\_\_\_

<sup>1</sup>H, <sup>13</sup>C and <sup>31</sup>P NMR of **8c**

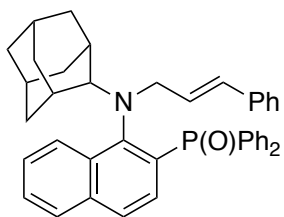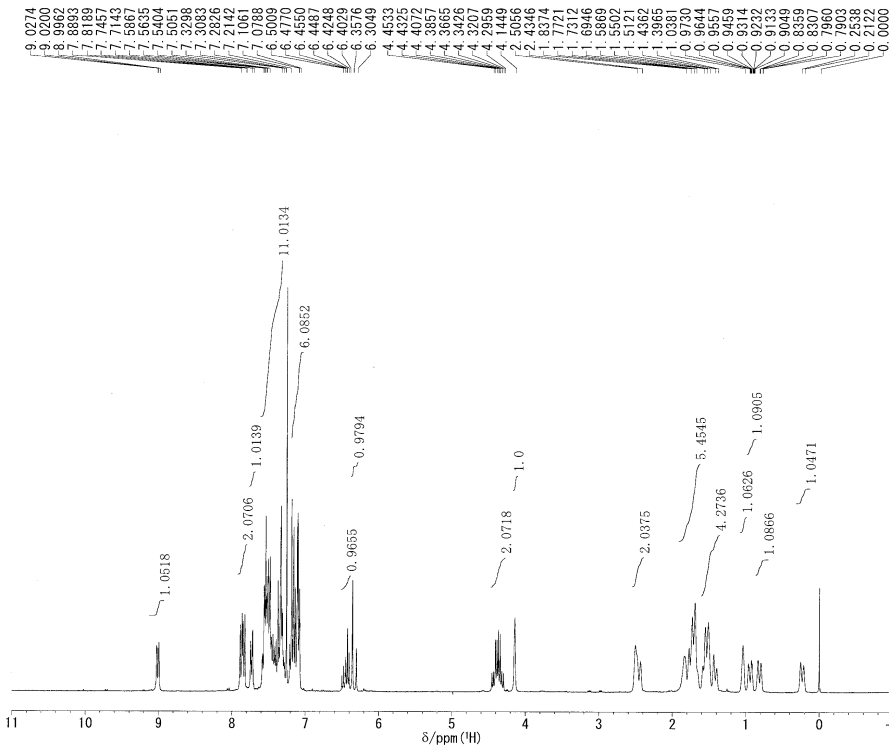

DFILE C:\KYOUSEI6\NMR\06MINO20  
15V20284H\1VPDATA\1V11  
DATIM 19/Jun/2015 18:10:51  
COMNT

ORNUC <sup>1</sup>H  
EXMUD ZG30  
OBFREQ 300.23 MH  
z  
OBSFZ 0.0 kHz  
OBFIN 10004.57 Hz  
POINT 16384  
FREQQU 3612.717 H  
z  
SCANS 8  
ACQTM 4.5351  
s  
PD 1.0 s  
PWI 9.0 μs  
IRNUC OFF  
PROBHD 5 MM BBO BB-1H-D Z-GR  
D 28284/01  
INSTRUM SPECT  
PULSPRG ZG30  
GRDPRG  
CTEMP 26.85 °C  
SLVNT CDCl<sub>3</sub>  
EXREF 0.0 ppm  
BF 0.25 Hz  
WINDOW Exponential  
RGAIN 228  
Operator

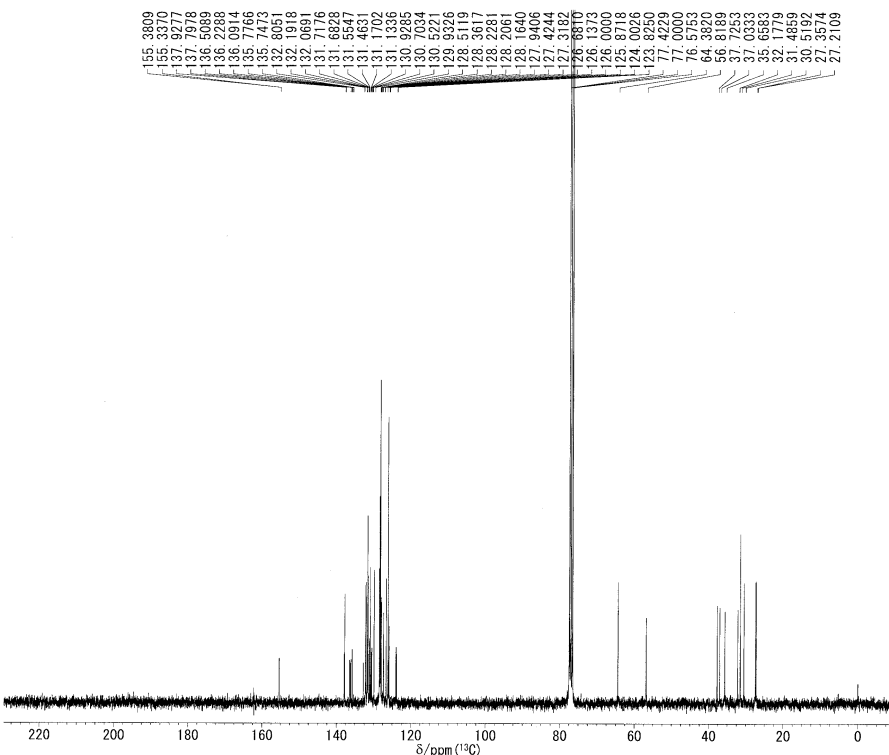

DFILE C:\KYOUSEI6\NMR\06MINO20  
16V21347CY1VPDATA\1V11  
DATIM 22/Sep/2016 18:40:48  
COMNT

ORNUC <sup>13</sup>C  
EXMUD ZGPG30  
OBFREQ 75.49 MH  
z  
OBSFZ 0.0 kHz  
OBFIN 10003.06 Hz  
POINT 32768  
FREQQU 18115.94 Hz  
SCANS 2048  
ACQTM 1.8088  
s  
PD 2.0 s  
PWI 0.0 μs  
IRNUC OFF  
PROBHD 5 MM BBO BB-1H-D Z-GR  
D 28284/01  
INSTRUM SPECT  
PULSPRG ZGPG30  
GRDPRG  
CTEMP 19.01 °C  
SLVNT CDCl<sub>3</sub>  
EXREF 77.0 ppm  
BF 0.25 Hz  
WINDOW Exponential  
RGAIN 813  
Operator

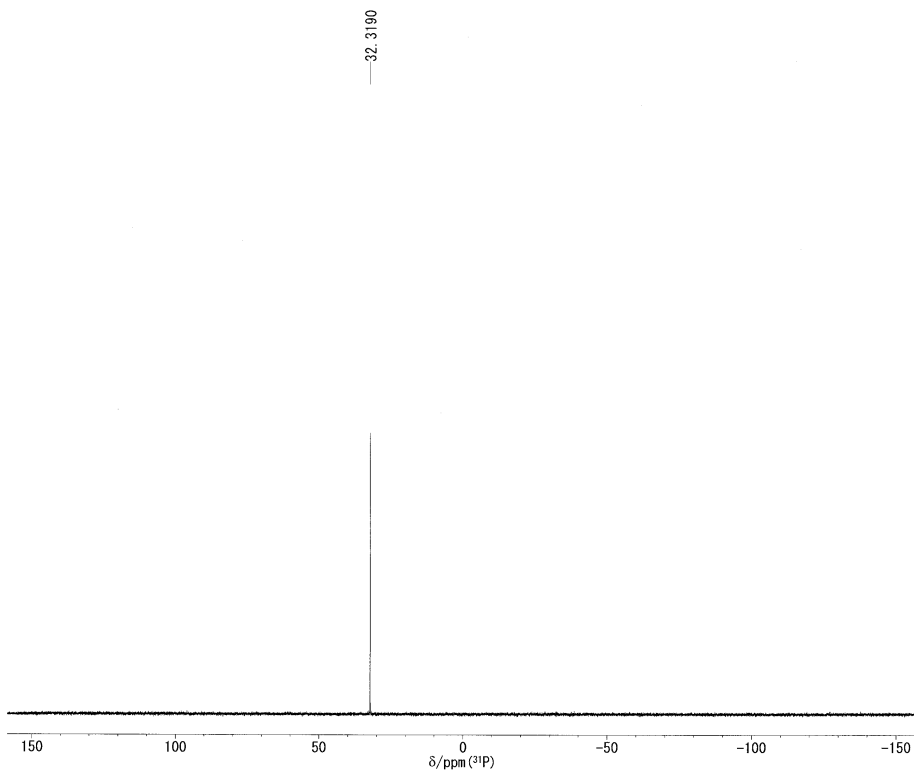

D:\FILE C:\KYOUSEI6\MRV06\1N020  
15V20266F\3VPDATA\1V11  
DATIN 12/Jun/2015 20:32:19  
COMNT

OBNUC <sup>31</sup>P  
EXMOD ZPGP30  
OBFRQ 121.54 MH  
Z  
OBSET 0.0 kHz  
OBFIN 10005.0 Hz  
POINT 32768  
FREQU 38535.64 Hz  
SCANS 8  
ACQTM 0.8503  
PD s 8.0 s  
PW1 0.0 μs  
IRNUC OFF  
PROBHD 5 MM BBO BB-1H-D Z-GR  
D ZS284/01  
INSTRUM SPECT  
PULSPRG ZPGP30  
GRDPRG  
CTEMP 26.85 °C  
SOLVENT CDCl<sub>3</sub>  
XREF 158.537 p  
BF pm 0.25 Hz  
WINDOW Exponential  
RGAIN 4096  
Operator \_\_\_\_\_

<sup>1</sup>H, <sup>13</sup>C and <sup>31</sup>P NMR of **8d**

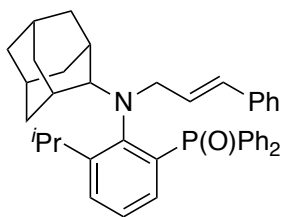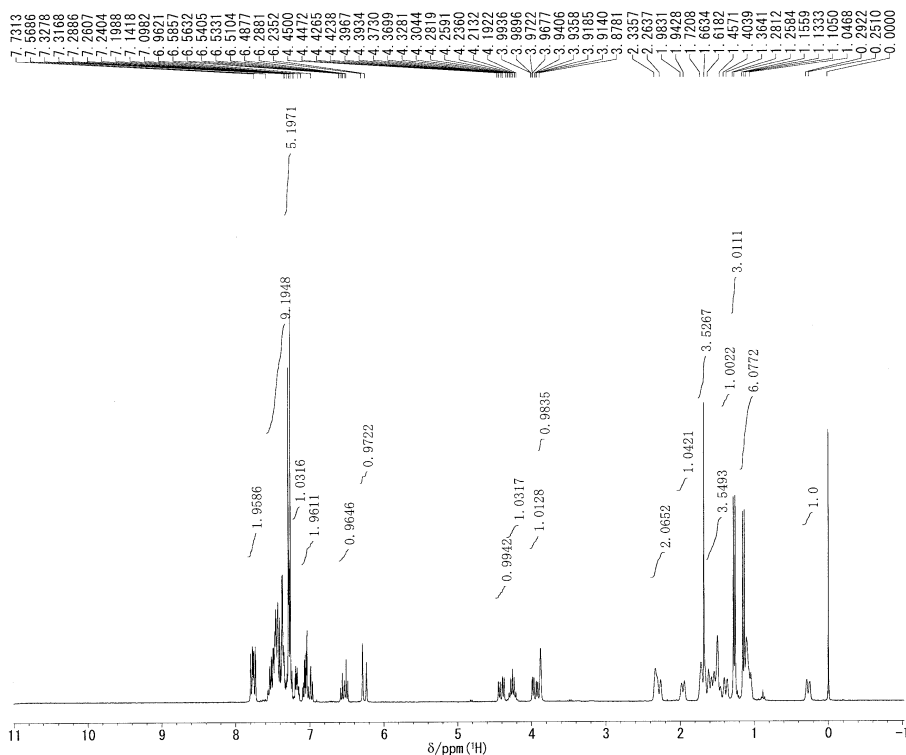

DFILE C:\KYOUSE16\NMR\06\IN020  
 16V21490H2VPDATAV111  
 DATIM 27/Oct/2016 19:13:28  
 COMNT  
 OBNUC <sup>1</sup>H  
 EXMOD ZG30  
 OBFREQ 300.23 MHz  
 z  
 OBSET 0.0 kHz  
 OBFIN 10004.57 Hz  
 POINT 16384  
 FREQU 3612.717 H  
 z  
 SCANS 16  
 ACQTM 4.5351  
 s  
 PD 1.0 s  
 PW1 9.0 μs  
 IRNUC OFF  
 PROBHD 5 MM BBO BB-1H-D Z-GR  
 D Z8284/01  
 INSTRUM SPECT  
 PULSPRG ZG30  
 GRDPRG  
 CTEMP 26.85 °C  
 SLVNT CDCL<sub>3</sub>  
 EXREF 0.0 ppm  
 BF 0.25 Hz  
 WINDOW Exponential  
 RGAIN 362  
 Operator \_\_\_\_\_

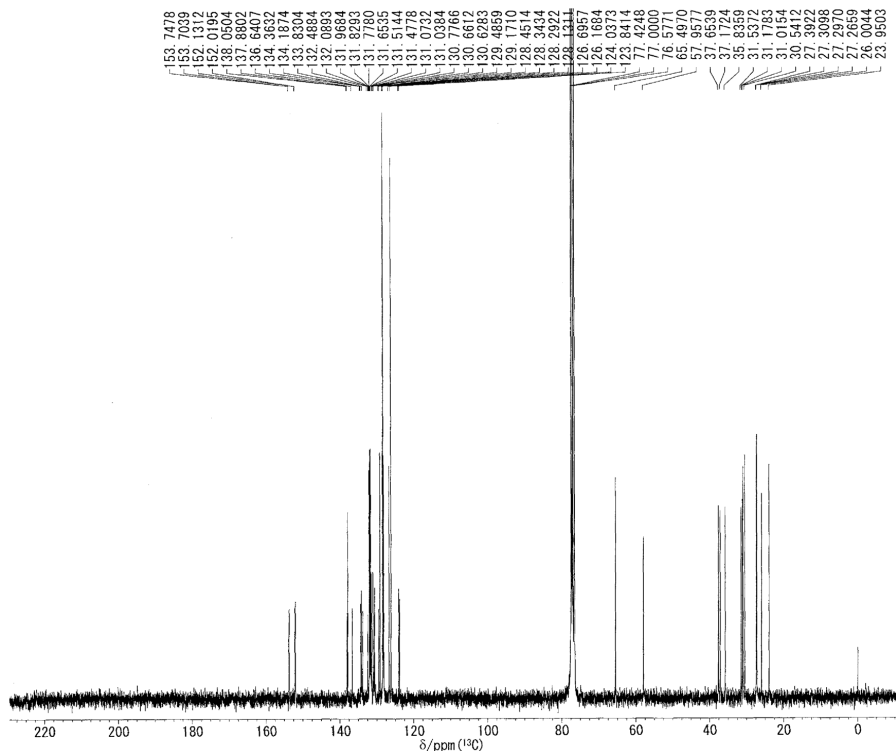

DFILE C:\NUSERS\KYOUSE16\WINYD  
 ESKTOPEH15WV2151H-2AD\_15  
 OFRO, CINNAMYL, OXIDEV21515C  
 V2VPDATAV111  
 DATIM 09/Nov/2016 09:44:00  
 COMNT  
 OBNUC <sup>13</sup>C  
 EXMOD ZGPC30  
 OBFREQ 75.49 MHz  
 z  
 OBSET 0.0 kHz  
 OBFIN 10003.06 Hz  
 POINT 32768  
 FREQU 18115.94 Hz  
 SCANS 9539  
 ACQTM 1.8088  
 s  
 PD 2.0 s  
 PW1 0.0 μs  
 IRNUC OFF  
 PROBHD 5 MM BBO BB-1H-D Z-GR  
 D Z8284/01  
 INSTRUM SPECT  
 PULSPRG ZGPC30  
 GRDPRG  
 CTEMP 26.85 °C  
 SLVNT CDCL<sub>3</sub>  
 EXREF 77.0 ppm  
 BF 0.25 Hz  
 WINDOW Exponential  
 RGAIN 2580  
 Operator \_\_\_\_\_

33.3253

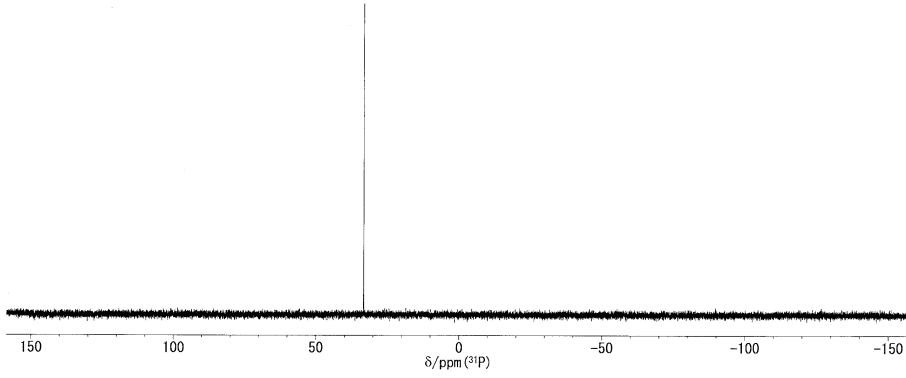

```
D:FILE C:\KYOUSEI6\MRV06\MIN020
16Y21490FY2\PDATAY1Y11
DATIM 27/Oct/2016 19:16:15
COMNT
OBNUC 31P
EXMOD ZGPG30
OBFRQ 121.54 MH
z
OBSET 0.0 kHz
OBFIN 10005.0 Hz
POINT 32768
PRGQU 38535.64 Hz
SCANS 8
ACQTM 0.8503
s
PD 8.0 s
PW 0.0  $\mu$ s
IRNUC OFF
PROBHD 5 MM BBO BB-HH-D Z-CR
D Z8284/01
INSTRUM SPECT
PULSPRG ZGPG30
GRDPRG
CTEMP 26.85  $^{\circ}$ C
SLVNT CDCL3
EXREF 158.537 p
pm
BF 0.25 Hz
WINDOW Exponential
RGAIN 13004
Operator _____
```

<sup>1</sup>H, <sup>13</sup>C and <sup>31</sup>P NMR, and chiral phase HPLC chart of (±)-**3a**

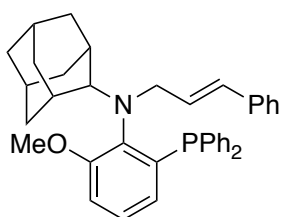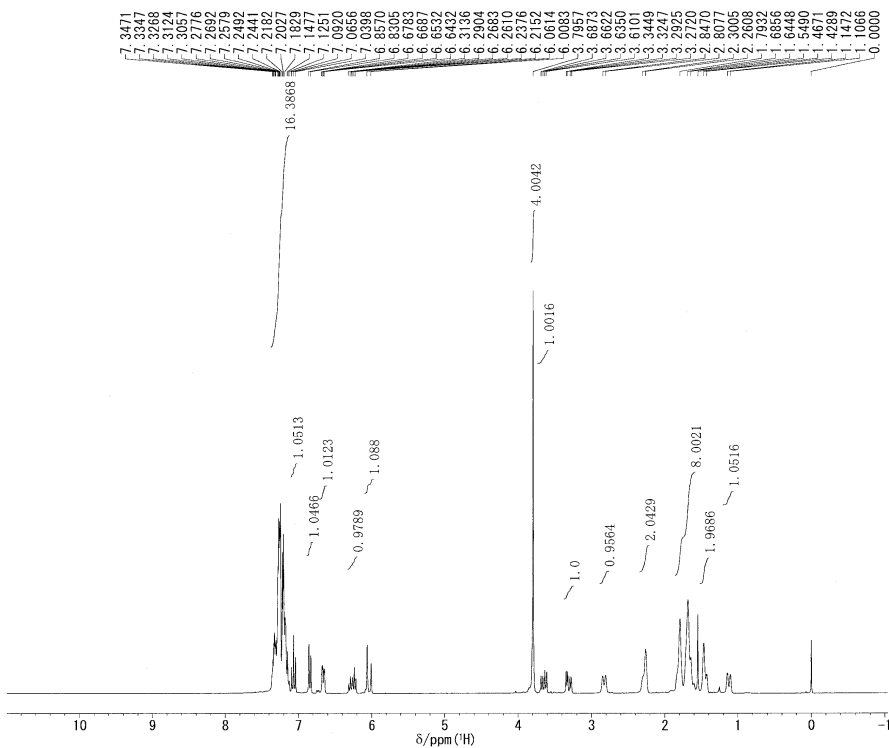

DFILE C:\KYOUSEI\6NMR\Y06M1N020  
16V21162CV1VPDATA\1V111  
DATEM 18/Jul/2016 10:13:16  
COMNT

ORNIC <sup>1</sup>H  
EXMOD ZG30  
OBFRQ 300.23 MH  
Z  
OBSET 0.0 kHz  
OBFIN 10004.57 Hz  
POINT 16384  
FREQU 3612.717 H  
SCANS 8  
ACQTM 4.5351  
PD 1.0 s  
PWI 9.0 μs  
IRNUC OFF  
PROHD 5 MM BBO BB-1H-D Z-GR  
D 28284/01  
INSTRUM SPECT  
PULSPRG ZG30  
GRDPRG  
CTEMP 21.01 °C  
SLVNT CDCl<sub>3</sub>  
EXREF 0.0 ppm  
BF 0.25 Hz  
WINDOW Exponential  
RGAIN 181  
Operator

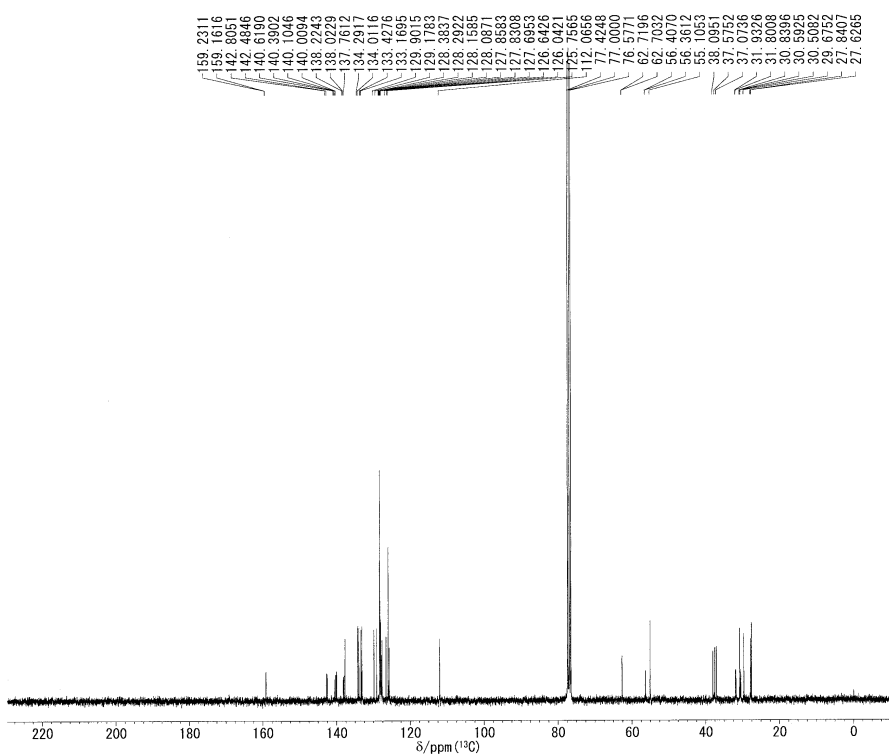

DFILE C:\KYOUSEI\6NMR\Y06M1N020  
16V21162CV1VPDATA\1V111  
DATEM 18/Jul/2016 11:20:13  
COMNT

ORNIC <sup>13</sup>C  
EXMOD ZGPC30  
OBFRQ 75.49 MH  
Z  
OBSET 0.0 kHz  
OBFIN 10003.06 Hz  
POINT 32768  
FREQU 18115.94 Hz  
SCANS 1024  
ACQTM 1.8088  
PD 2.0 s  
PWI 0.0 μs  
IRNUC OFF  
PROHD 5 MM BBO BB-1H-D Z-GR  
D 28284/01  
INSTRUM SPECT  
PULSPRG ZGPC30  
GRDPRG  
CTEMP 21.01 °C  
SLVNT CDCl<sub>3</sub>  
EXREF 77.0 ppm  
BF 0.25 Hz  
WINDOW Exponential  
RGAIN 2048  
Operator

17.5504

DFILE C:\KYOUSEI\6NMR\06M1\020  
15V20484P3Y3PDATA\1Y11  
DATIM 14/Oct/2015 08:57:45  
COMNT  
OBNUC <sup>31</sup>P  
EXMOD ZPG30  
OBFRQ 121.54 MH  
Z  
ORSET 0.0 kHz  
ORPIN 10005.0 Hz  
PGINT 32768  
FREQU 38535.64 Hz  
SCANS 8  
ACQTM 0.8503  
S  
PD 8.0 s  
PW1 0.0 μs  
TRNUC OFF  
PROBHD 5 MM BBO BB-1H-D Z-GR  
D Z8284/01  
INSTRUM SPECT  
PULPROG ZPG30  
GRDPROG  
CTEMP 26.85 °C  
SOLVT CDCl<sub>3</sub>  
EXREF 158.537 p  
pm  
BF 0.25 Hz  
WINDOW Exponential  
RGAIN 5161  
Operator \_\_\_\_\_

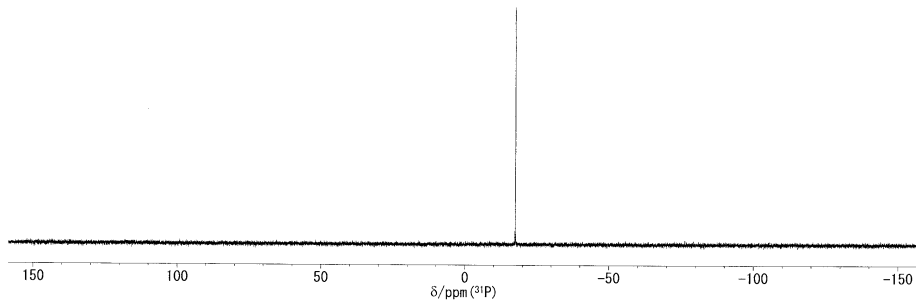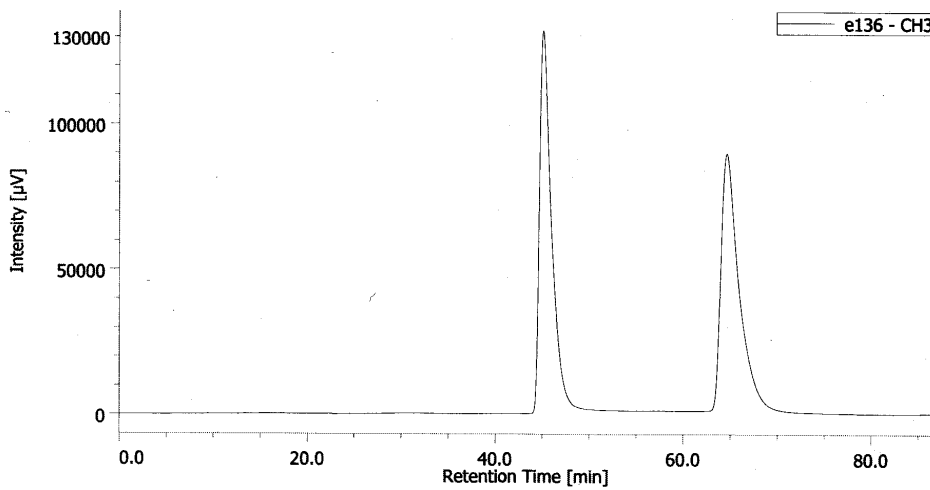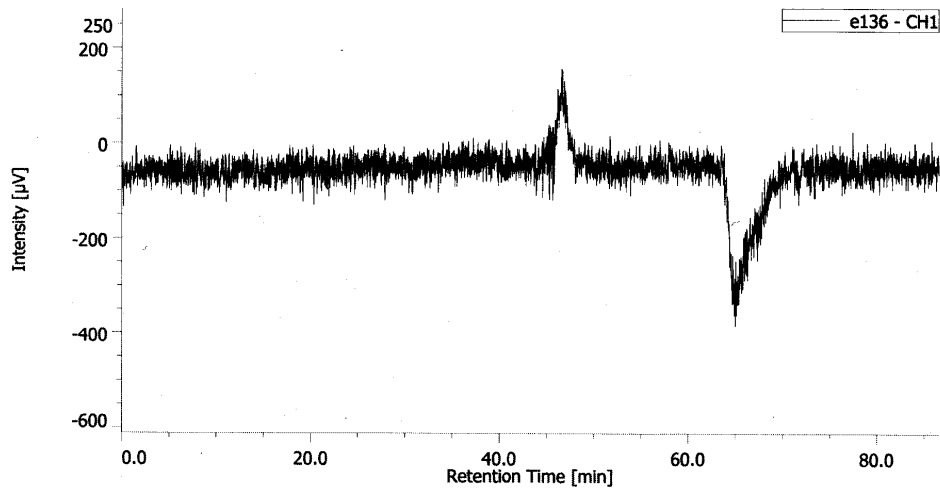



<sup>1</sup>H, <sup>13</sup>C and <sup>31</sup>P NMR, and chiral phase HPLC chart of (±)-**3b**

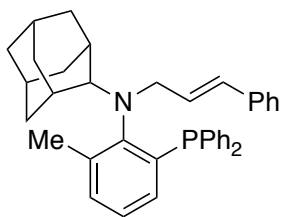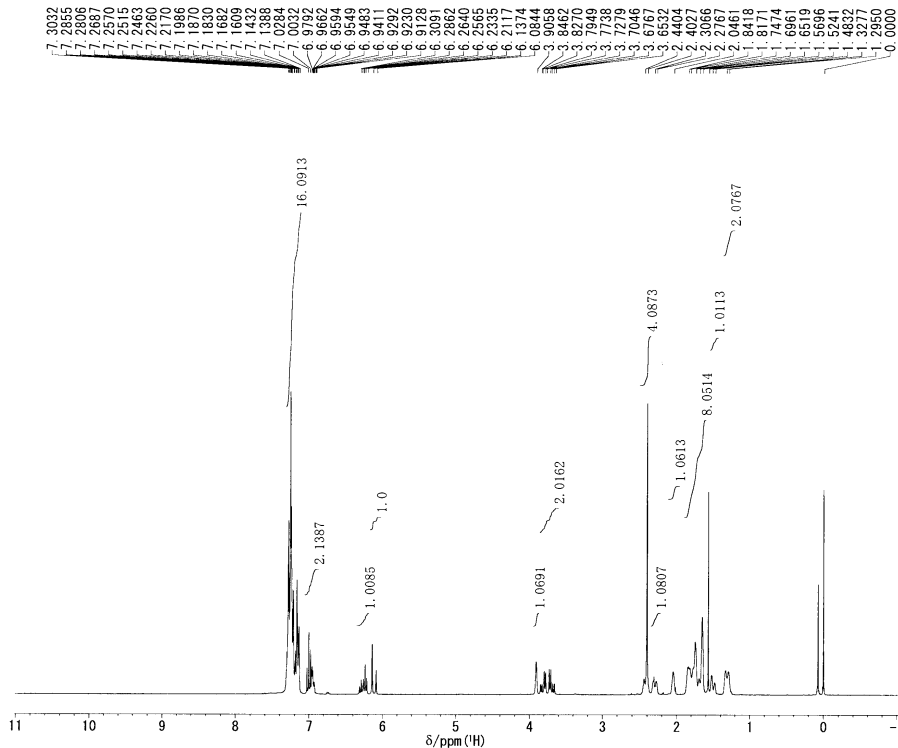

DFILE C:\KYOUSEI6\NMR\YOMINO201  
4\19920\H1\VPDATA\1\11  
DATIM 05/Jan/2015 14:09:13  
COMNT

ORNUC <sup>1</sup>H  
EXMOD ZG30  
OBFRQ 300.23 MHz  
ORSET 0.0 kHz  
OBFIN 10004.57 Hz  
POINT 16384  
FREQU 3612.717 Hz  
SCANS 8  
ACQTM 4.5351 s  
PD 1.0 s  
PWI 9.0 ps  
IRNUC OFF  
PROBHD 5 MM BBO BB-1H-D Z-GRD  
28294/01  
INSTRUM SPECT  
PULSPRG ZG30  
GRDPRG  
CTEMP 26.85 °C  
SLVNT CDCl<sub>3</sub>  
EXREF 11.0049 p  
BF pm  
WINDOW 0.25 Hz  
RGAIN Exponential  
362  
Operator

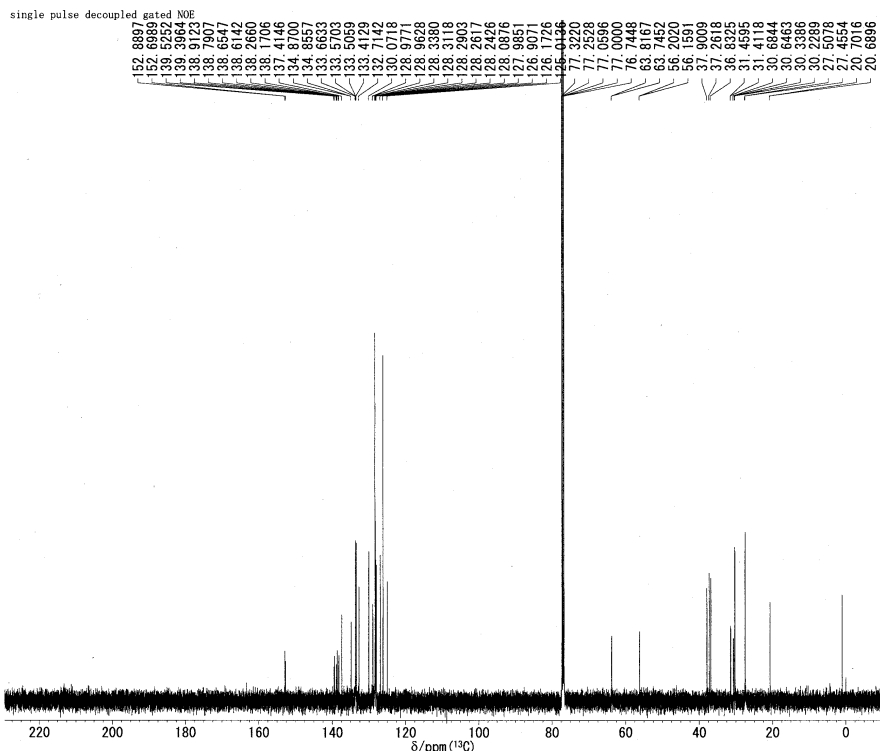

DFILE C:\Users\kyousei6\win\VD  
esktop\20150226\_ebi\_exp62\_  
Carbon-1-1.jaf  
DATIM 26/Feb/2015 04:50:37  
COMNT single pulse decoupled gat  
ed NOE  
ORNUC <sup>13</sup>C  
EXMOD carbon\_1jaf  
OBFRQ 125.77 MH  
ORSET -5.0 kHz  
OBFIN 301.0403  
Hz  
POINT 131072 (ZeroF  
111::x4)  
FREQU 39308.18 Hz  
SCANS 256  
ACQTM 0.8336  
s  
PD 2.0 s  
PWI 3.5333  
ms  
IRNUC <sup>1</sup>H  
PROBHD JNM-ECA500  
INSTRUM  
PULSPRG  
GRDPRG  
CTEMP 20.4 °C  
SLVNT CHLOROFORM-d  
EXREF 77.0 ppm  
BF 0.25 Hz  
WINDOW Exponential  
RGAIN 50  
Operator

DFILE C:\KYOUSEI\6MRV06MINO20  
 14\19920PY1\YDATA\Y111  
 DATIM 05/Jan/2015 14:14:32  
 COMNT  
 OBNUC <sup>31</sup>P  
 EXMOD ZGPC30  
 OBFRQ 121.54 MH  
 Z  
 OBSET 0.0 kHz  
 OBFIN 10005.0 Hz  
 POINT 32768  
 FREQU 38535.64 Hz  
 SCANS 8  
 ACQTM 0.8503  
 S  
 PD 8.0 s  
 PW1 0.0  $\mu$ s  
 TRNUC OFF  
 PROBHD 5 MM BBO BB-1H-D Z-CR  
 D Z8284/01  
 INSTRUM SPECT  
 PULSPRG ZGPC30  
 GRDPROG  
 CTEMP 26.85  $^{\circ}$ C  
 SLVNT CDCL<sub>3</sub>  
 EXREF 158.537 p  
 pm  
 BF 0.25 Hz  
 WINDOW Exponential  
 RGAIN 13004  
 Operator \_\_\_\_\_

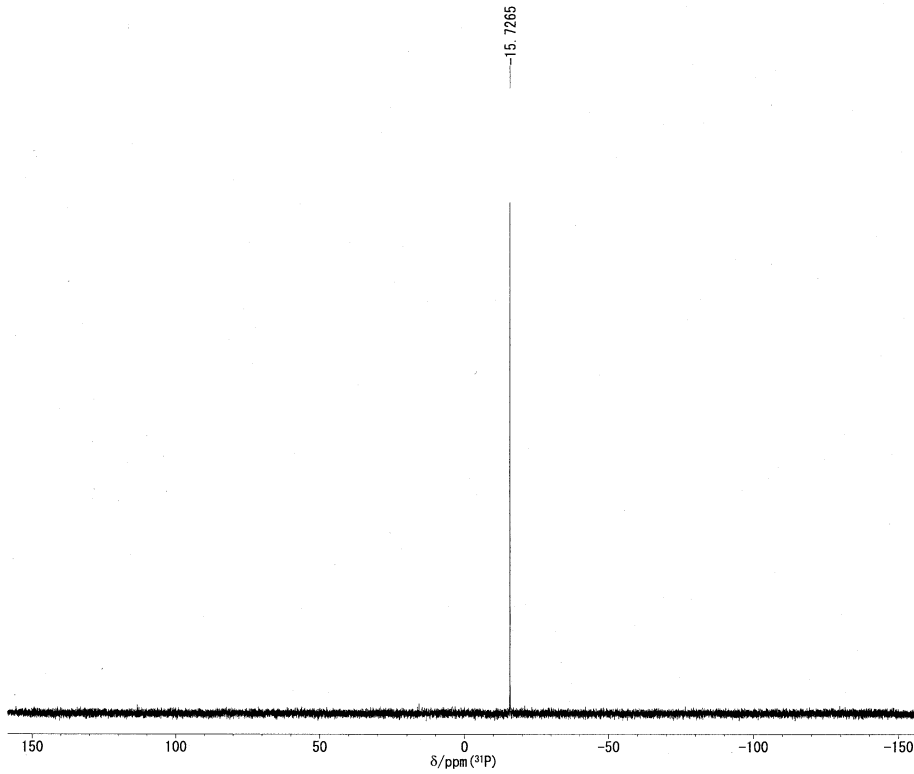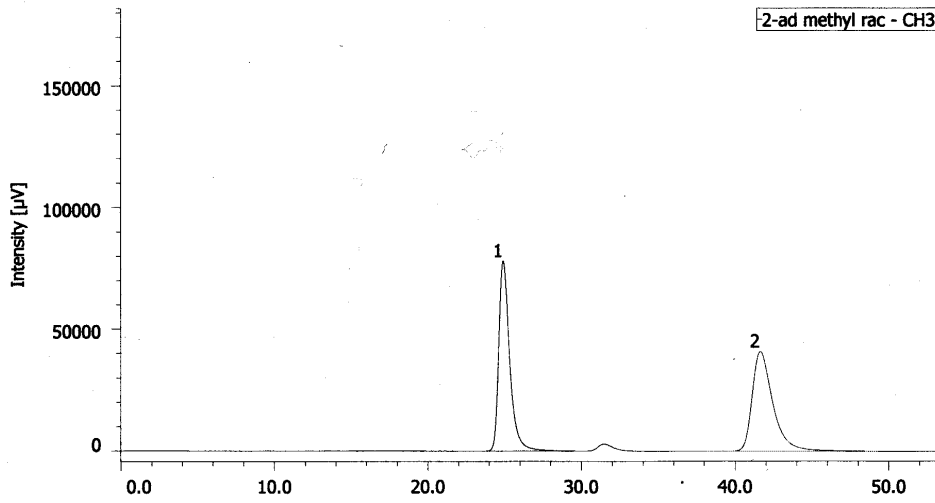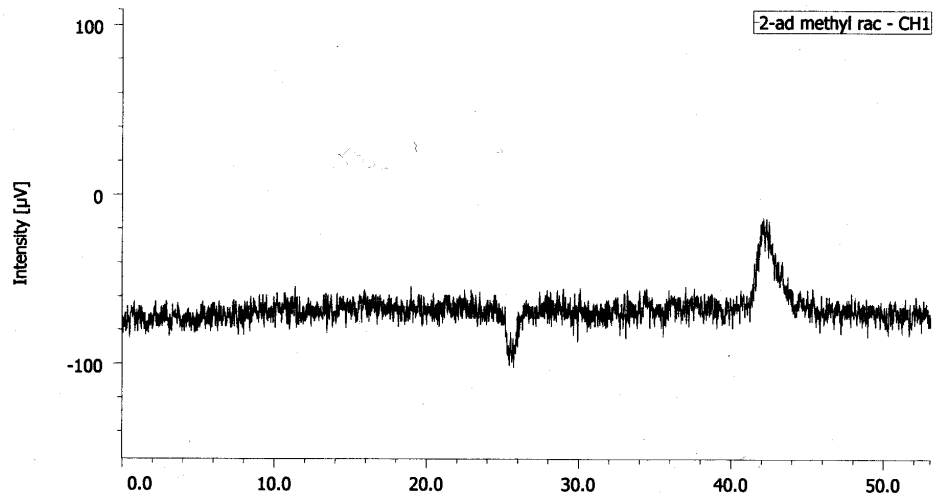

<sup>1</sup>H, <sup>13</sup>C and <sup>31</sup>P NMR, and chiral phase HPLC chart of (±)-3c

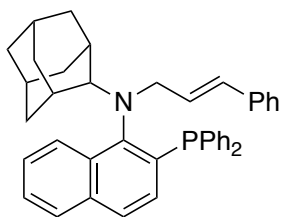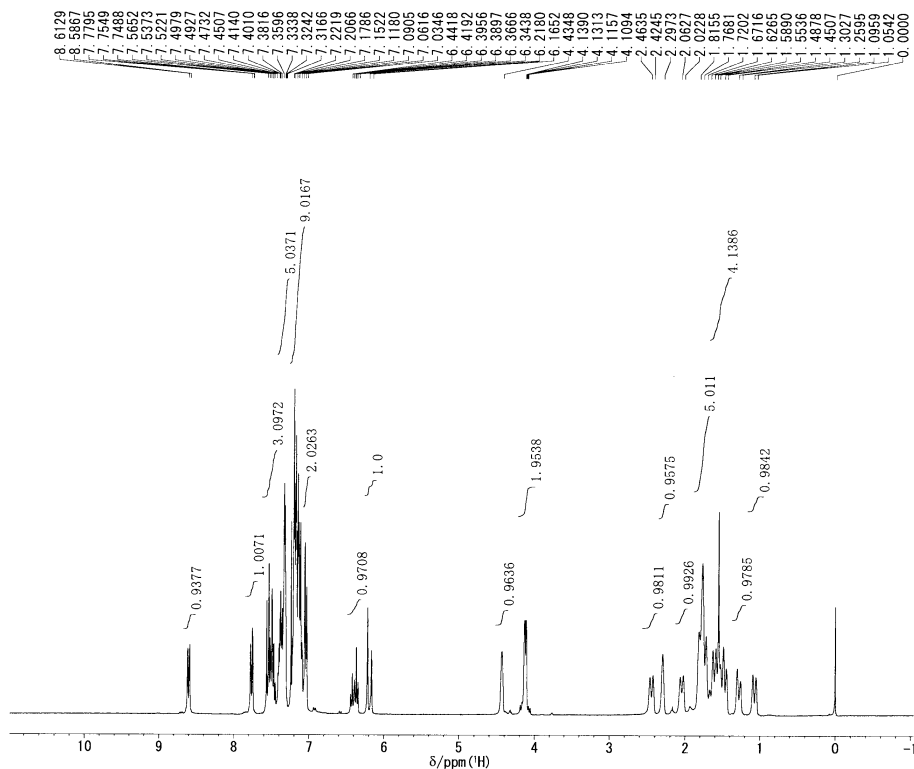

DFILE: C:\KYOUSEI\6NMR\6MINO201  
 5V20281H1VPDATA\1V11  
 DATIM: 18/Jun/2015 17:59:43  
 COMNT:

OBNUC: <sup>1</sup>H  
 EXMOD: ZG30  
 OBFREQ: 300.23 MHz  
 OBSSET: 0.0 kHz  
 OBSFIN: 10004.57 Hz  
 POINT: 16384  
 FREQU: 3612.717 Hz  
 SCANS: 8  
 ACQTM: 4.5351 s  
 PD: 1.0 s  
 PFI: 9.0 μs  
 IRNUC: OFF  
 PROBD: 5 MM BBO BB-1H-D Z-GR  
 D 28284/01  
 INSTRUM: SPECT  
 PULSPRG: ZG30  
 GRDPRG: SPECT  
 CTEMP: 26.85 °C  
 SLVNT: CDCl<sub>3</sub>  
 EXREF: 0.0 ppm  
 BF: 0.25 Hz  
 WINDOW: Exponential  
 RGAIN: 228  
 Operator: \_\_\_\_\_

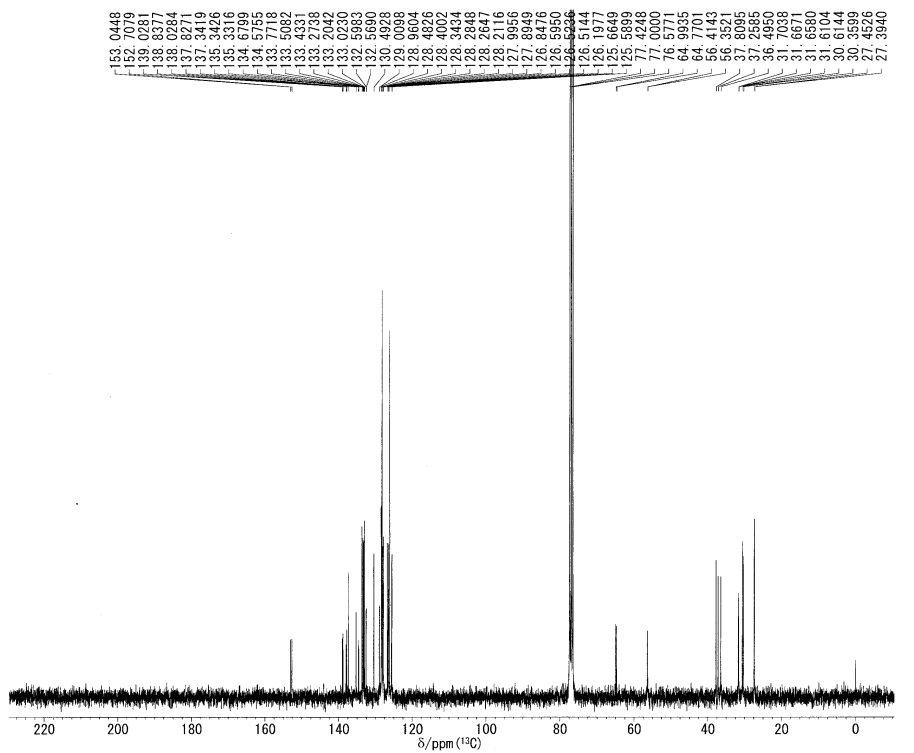

DFILE: C:\KYOUSEI\6NMR\6MINO20  
 16V2131FCV2VPDATA\1V11  
 DATIM: 22/Sep/2016 20:58:43  
 COMNT:

OBNUC: <sup>13</sup>C  
 EXMOD: ZGPG30  
 OBFREQ: 75.49 MH  
 OBSSET: 0.0 kHz  
 OBSFIN: 10003.06 Hz  
 POINT: 32768  
 FREQU: 18115.94 Hz  
 SCANS: 2048  
 ACQTM: 1.8088 s  
 PD: 2.0 s  
 PFI: 0.0 μs  
 IRNUC: OFF  
 PROBD: 5 MM BBO BB-1H-D Z-GR  
 D 28284/01  
 INSTRUM: SPECT  
 PULSPRG: ZGPG30  
 GRDPRG: SPECT  
 CTEMP: 20.01 °C  
 SLVNT: CDCl<sub>3</sub>  
 EXREF: 77.0 ppm  
 BF: 0.25 Hz  
 WINDOW: Exponential  
 RGAIN: 1626  
 Operator: \_\_\_\_\_

```

D:\FILE C:\KRYOUSEI6\NMR\06MIN020
15V20266PV1\PDAT\TAYIY11
DATIM 12/Jan/2015 20:14:15
COMNT
ORNUC 31P
EXMOD ZGPG30
ORFRQ 121.54 MH
z
ORSET 0.0 kHz
OBFIN 10005.0 Hz
POINT 32768
FREQU 38535.64 Hz
SCANS 8
ACQTM 0.8503
s
PD 8.0 s
PW 0.0  $\mu$ s
FMUC OFF
PROBHD 5 MM BBO BB-1H-D Z-GR
D 28284/01
INSTRM SPECT
PULSFRG ZGPG30
GRDPROG
CTEMP 26.85  $^{\circ}$ C
SLVNT CDCL3
EXREF 158.537 p
pm
RF 0.25 Hz
WINDOW Exponential
RGAIN 13004
Operator _____

```

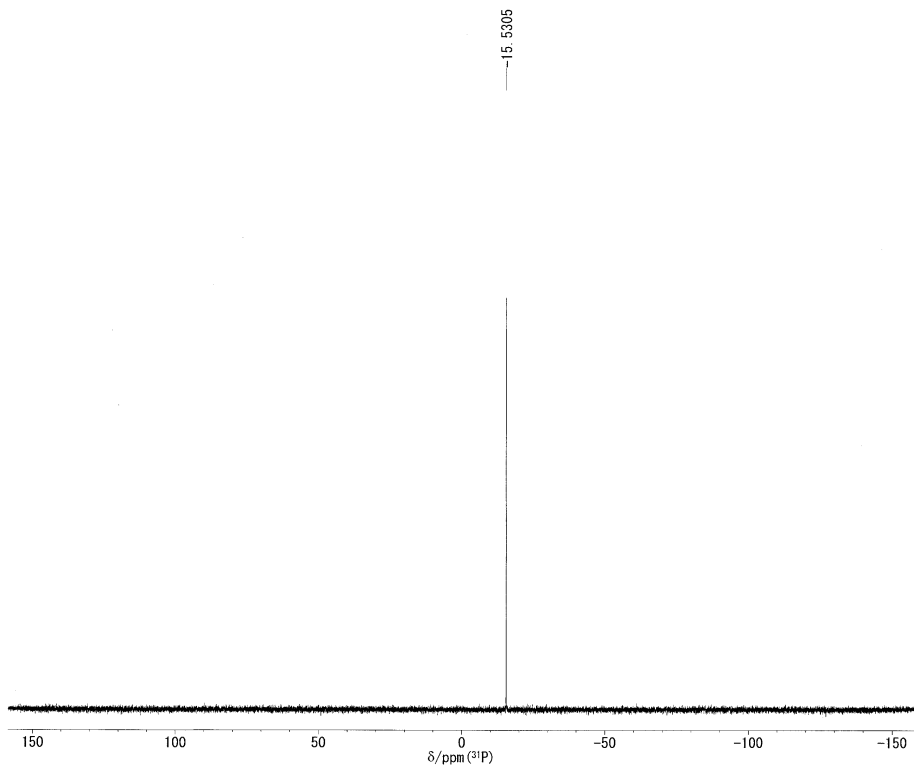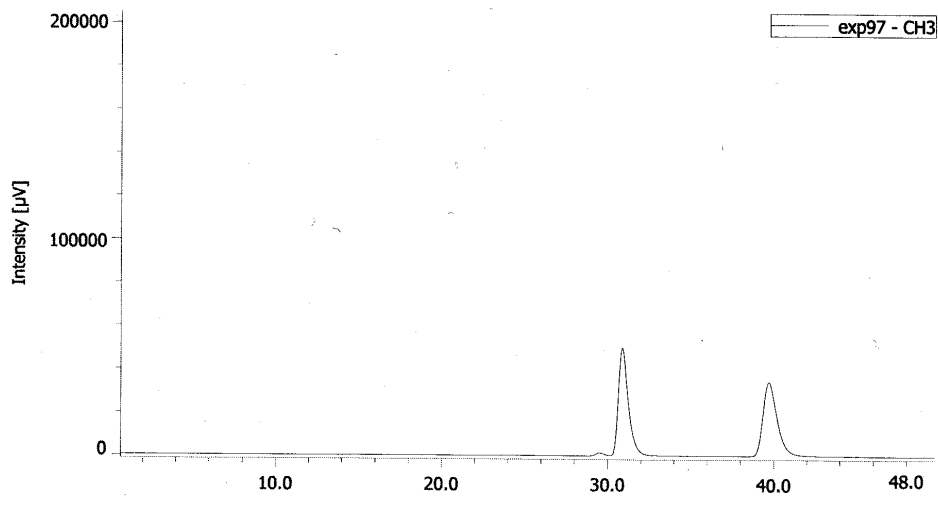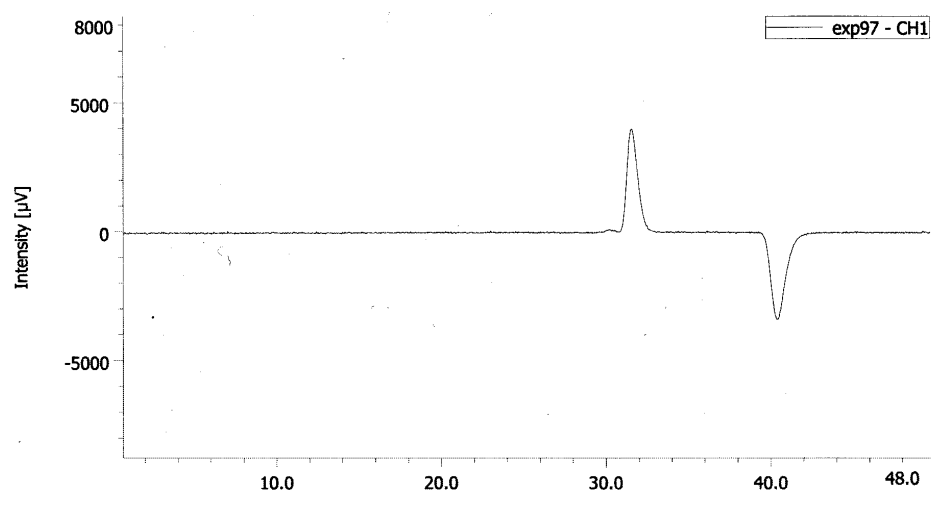

<sup>1</sup>H, <sup>13</sup>C and <sup>31</sup>P NMR, and chiral phase HPLC chart of (±)-**3d**

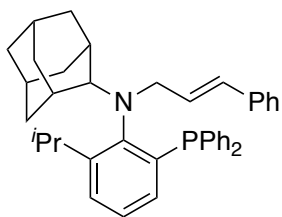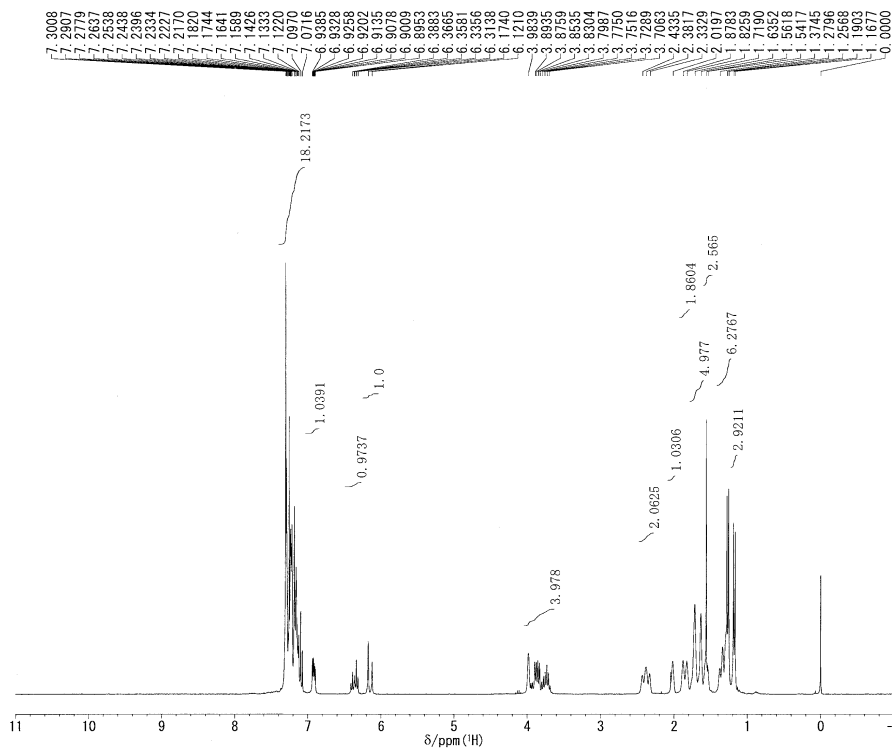

```

DFILE C:\YKHOUSE\16NMR\06MIN020
DATE 16V21500HZ29PPATAY1V11
DATIM 31/Oct/2016 18:59:40
COMNT

OBNUC 1H
EXMOD ZG30
OBFRQ 300.23 MH
z
OBSET 0.0 kHz
OBFIN 10004.57 Hz
POINT 16384
FREQU 3612.717 H
z
SCANS 16
ACQTM 4.5351
s
PD 1.0 s
PW1 9.0 us
IRNUC OFF
PROBHD 5 MM BBO BB-1H-D Z-GR
D 28284/01
INSTRUM SPECT
PULSPRG ZG30
GRDPRG
CTEMP 26.85 °C
SLVNT CDCl3
EXREF 0.0 ppm
BF 0.25 Hz
WINDOW Exponential
RGAIN 362
Operator
    
```

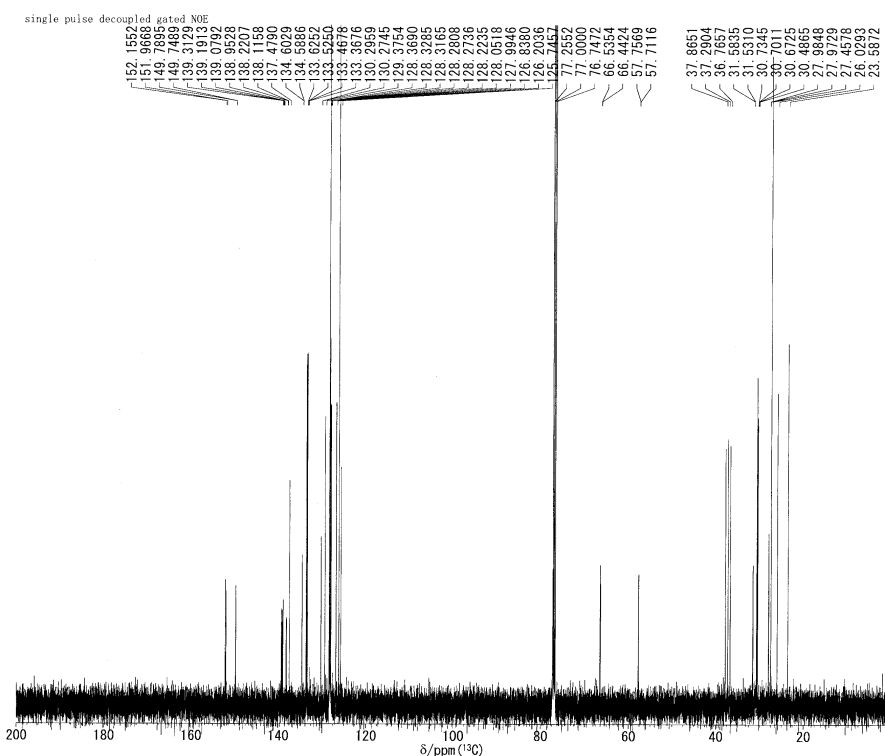

```

DFILE C:\Users\Ykousei6-win\VD
esktop\20161111\ebisawa e1
68_Carbon-13_1.dfr
DATIM 11/Nov/2016 08:53:39
COMNT single pulse decoupled gat
ed NOE
OBNUC 13C
EXMOD carbon_jxp
OBFRQ 125.77 MH
z
OBSET -5.0 kHz
OBFIN 301.0503
Hz
POINT 131072 (ZeroF
i11:x4)
FREQU 39308.18 Hz
SCANS 1024
ACQTM 0.8336
s
PD 2.0 s
PW1 3.7833
ms
IRNUC 1H
PROBHD JNM-ECA500
INSTRUM
PULSPRG
GRDPRG
CTEMP 20.6 °C
SLVNT CHLOROFORM-D
EXREF 77.0 ppm
BF 0.25 Hz
WINDOW Exponential
RGAIN 50
Operator
    
```

14.5242

D:\FILE C:\KYOU\SE16\NMR\VOGMINO20  
16Y21500PY2Y\DATA\Y111  
DATE\TIME 31/Oct/2016 19:01:45  
COMENT  
OBNUC <sup>31</sup>P  
EXMOD ZFGP30  
OBFRQ 121.54 MH  
Z  
OBSET 0.0 kHz  
OBFIN 10000.0 Hz  
POINT 32768  
FREQU 38538.64 Hz  
SCANS 8  
ACQTM 0.8503  
s  
PD 8.0 s  
PW1 0.0 μs  
IRNUC OFF  
PROBHD 5 MM BBO BB-1H-D Z-GR  
D 28284/01  
INSTRUM SPECT  
PULSPRG ZFGP30  
GRDPRG  
CTEMP 26.85 °C  
SLVNT CDCl<sub>3</sub>  
EXREF 158.537 p  
pm  
BF 0.25 Hz  
WINDOW Exponential  
RGAIN 9195  
Operator \_\_\_\_\_

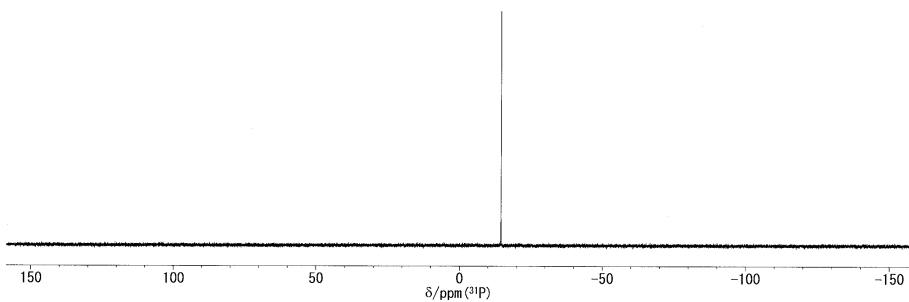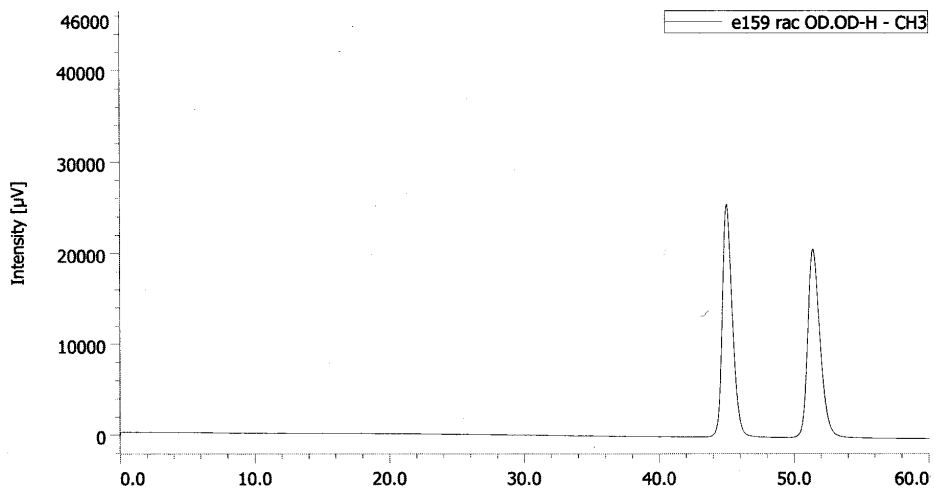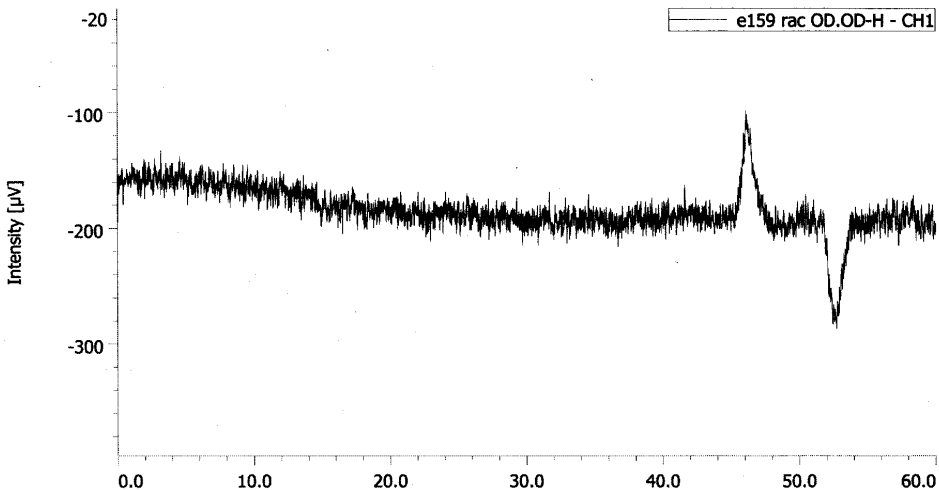

<sup>1</sup>H, <sup>13</sup>C and <sup>31</sup>P NMR, and chiral phase HPLC chart of (*S*)-(-)-**3b**

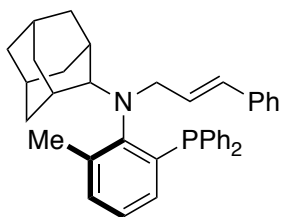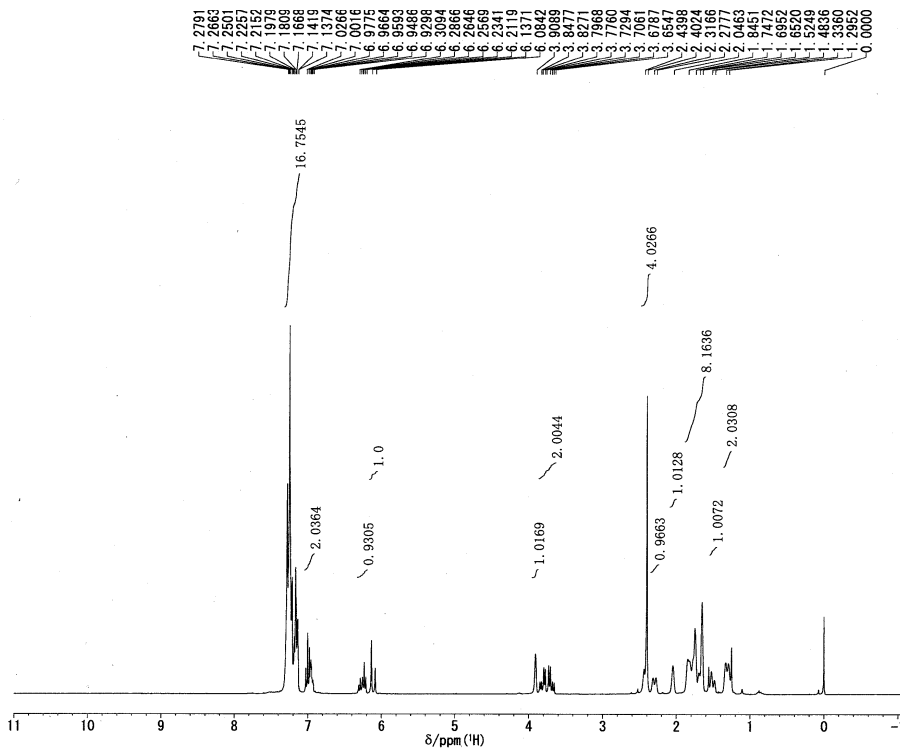

DFILE C:\KYOUSEI6\NMR\VO6MINO20  
16V21718V3PDATA\1V11  
DATIM 17/Jan/2017 22:58:07  
COMNT  
OBRUC <sup>1</sup>H  
EXMOD ZG30  
OBFREQ 300.23 MH  
z  
OBSET 0.0 kHz  
OBFIN 10004.57 Hz  
POINT 16384  
FREQU 3612.717 H  
z  
SCANS 16  
ACQTM 4.5351  
s  
PD 1.0 s  
PWI 9.0 μs  
IRNUC OFF  
PROBHD 5 MM BBO BB-1H-D Z-GR  
D 28284/01  
INSTRUM SPECT  
PULSPRG ZG30  
GRDPRG  
CTEMP 26.85 °C  
SLVNT CDCl<sub>3</sub>  
EXREF 0.0 ppm  
BF 0.25 Hz  
WINDOW Exponential  
RGAIN 256  
Operator \_\_\_\_\_

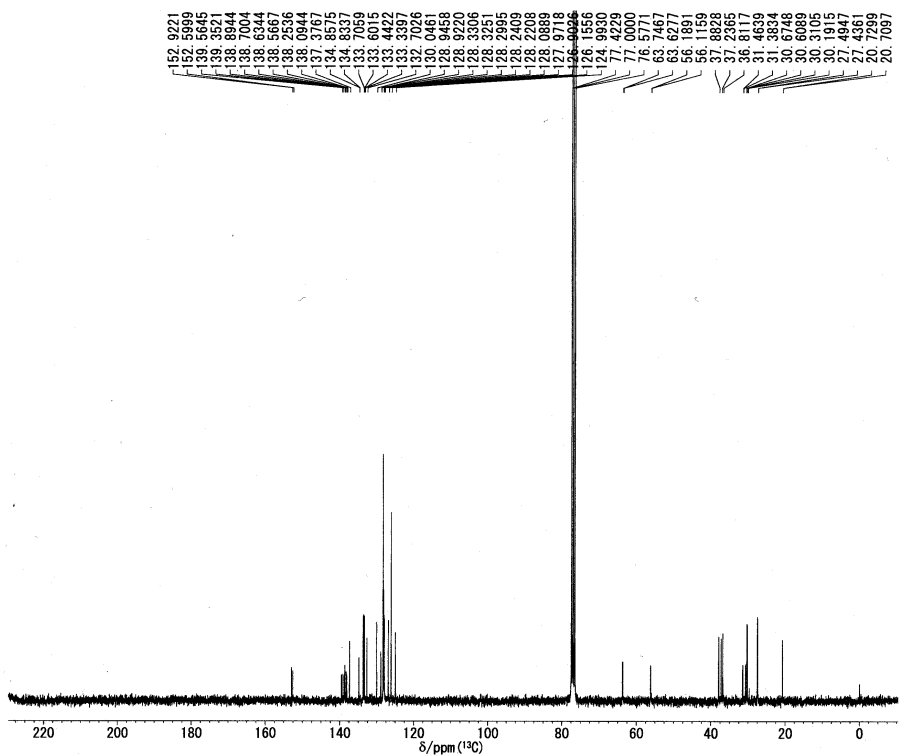

DFILE C:\KYOUSEI6\NMR\VO6MINO20  
16V21718V3PDATA\1V11  
DATIM 18/Jan/2017 01:11:40  
COMNT  
OBRUC <sup>13</sup>C  
EXMOD ZGPG30  
OBFREQ 75.49 MH  
z  
OBSET 0.0 kHz  
OBFIN 10003.06 Hz  
POINT 32768  
FREQU 18115.94 Hz  
SCANS 2048  
ACQTM 1.8088  
s  
PD 2.0 s  
PWI 0.0 μs  
IRNUC OFF  
PROBHD 5 MM BBO BB-1H-D Z-GR  
D 28284/01  
INSTRUM SPECT  
PULSPRG ZGPG30  
GRDPRG  
CTEMP 26.85 °C  
SLVNT CDCl<sub>3</sub>  
EXREF 77.0 ppm  
BF 0.25 Hz  
WINDOW Exponential  
RGAIN 4598  
Operator \_\_\_\_\_

15.6926

D:\FILE C:\YK\OUSE16\NRV06MIN020  
16\21718PW1\PDATAV1\111  
DATIM 16/Jan/2017 22:13:36  
COMNT  
ORNUC <sup>31</sup>P  
EXMOD ZGPC30  
ORPRO 121.54 MH  
Z  
OBSET 0.0 kHz  
OBFIN 10005.0 Hz  
POINT 32768  
FREQU 38535.64 Hz  
SCANS 8  
ACQTH 0.8503  
S  
PD 8.0 s  
PWI 0.0  $\mu$ s  
TRNUC OFF  
PROBHD 5 MM BBO BB-1H-D Z-GR  
D 28284/01  
INSTRUM SPECT  
PULSPRG ZGPC30  
GRDPROG  
CTEMP 26.85  $^{\circ}$ C  
SUNVT CDCl<sub>3</sub>  
EKREF 158.537 p  
ppm  
BF 0.25 Hz  
WINDOW Exponential  
RGAIN 9195  
Operator \_\_\_\_\_

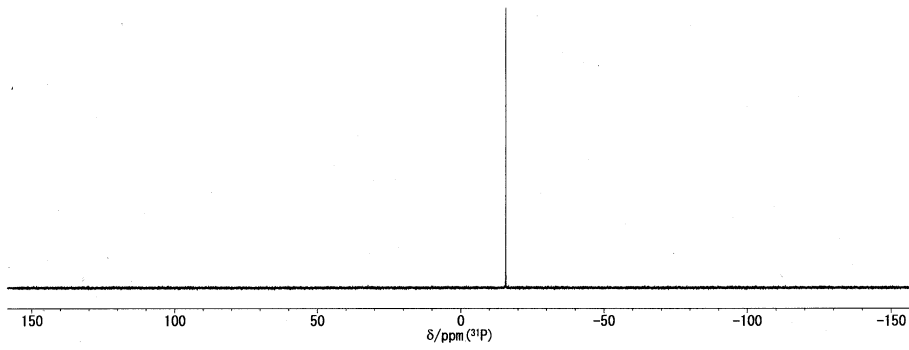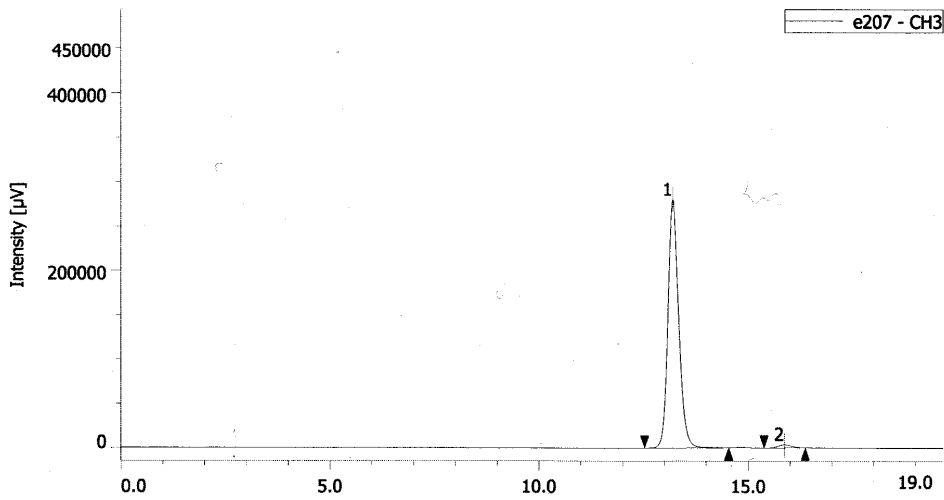

peak name area area%

| peak name | area   | area%          |
|-----------|--------|----------------|
| Unknown 3 | 13.200 | 5084478 98.514 |
| Unknown 3 | 15.867 | 76710 1.486    |



$^1\text{H}$ ,  $^{13}\text{C}$  and  $^{31}\text{P}$  NMR, and chiral phase HPLC chart of (*R*)-(+)-**3b**

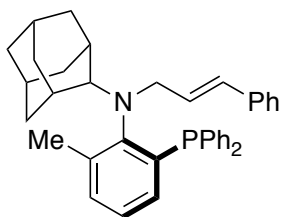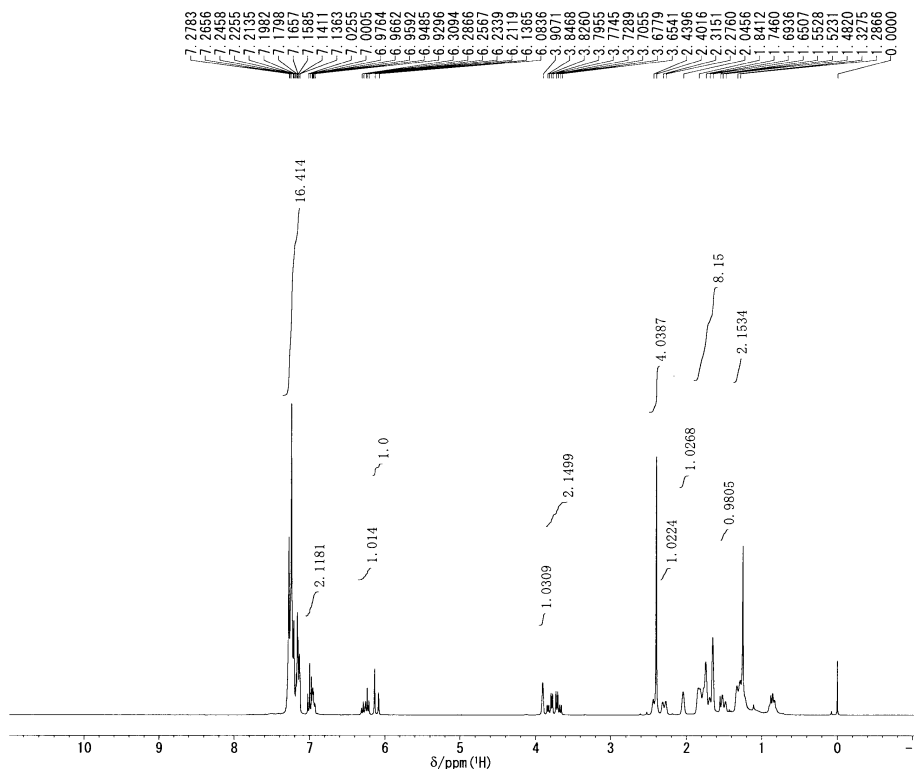

DFILE C:\KYOUSEI6\NMR\06MIN0201  
 6V21718H4VPDATA1V111  
 DATIM 18/Jan/2017 01:25:43  
 COMNT

OBNUC  $^1\text{H}$   
 EXMOD ZG30  
 OBFRQ 300.23 MHz  
 OBSET 0.0 kHz  
 OBFIN 10004.57 Hz  
 POINT 16384  
 FREQU 3612.717 Hz  
 SCANS 16  
 ACQTM 4.5351 s  
 PD 1.0 s  
 FW 9.0  $\mu\text{s}$   
 IRNUC OFF  
 PROBHD 5 MM BBO BB-1H-D Z-GRD  
 78284/01  
 INSTRUM SPECT  
 PULSPRG ZG30  
 GRDPRG  
 CTEMP 26.85  $^{\circ}\text{C}$   
 SLVNT CDCl<sub>3</sub>  
 EXREF 0.0 ppm  
 BF 0.25 Hz  
 WINDOW Exponential  
 RGAIN 256  
 Operator

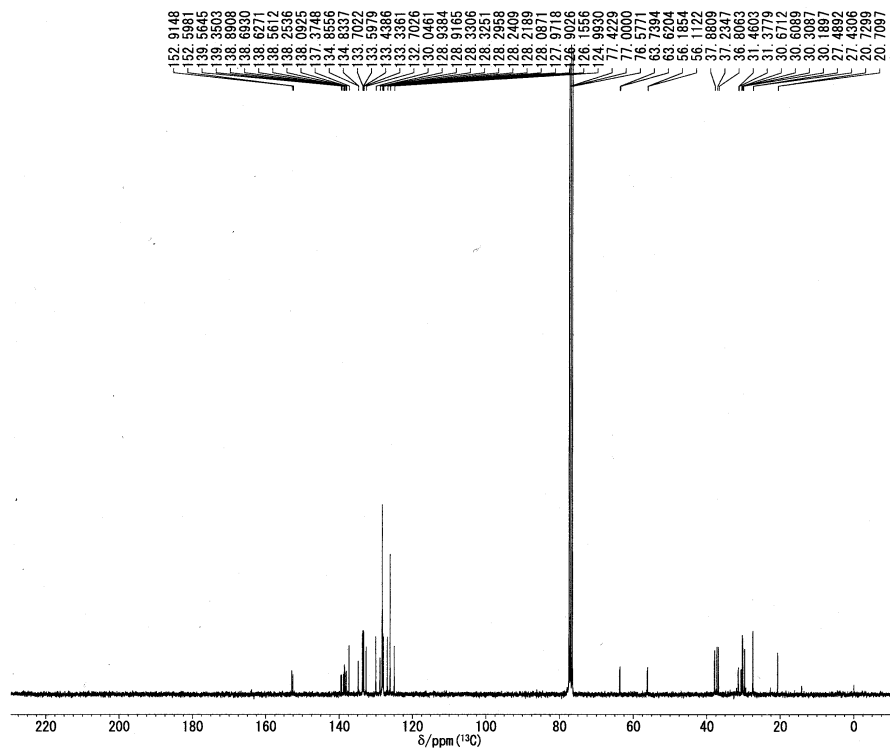

DFILE C:\KYOUSEI6\NMR\06MIN020  
 16V21718C4VPDATA1V111  
 DATIM 18/Jan/2017 03:38:44  
 COMNT

OBNUC  $^{13}\text{C}$   
 EXMOD ZPG30  
 OBFRQ 75.49 MH  
 OBSET 0.0 kHz  
 OBFIN 10003.06 Hz  
 POINT 32768  
 FREQU 18115.94 Hz  
 SCANS 2048  
 ACQTM 1.8088 s  
 PD 2.0 s  
 FW 0.0  $\mu\text{s}$   
 IRNUC OFF  
 PROBHD 5 MM BBO BB-1H-D Z-GRD  
 78284/01  
 INSTRUM SPECT  
 PULSPRG ZPG30  
 GRDPRG  
 CTEMP 26.85  $^{\circ}\text{C}$   
 SLVNT CDCl<sub>3</sub>  
 EXREF 77.0 ppm  
 BF 0.25 Hz  
 WINDOW Exponential  
 RGAIN 4598  
 Operator

DFILE C:\KYOUSEI\6\MR\Y06MINO20  
 16\21718\F2\DATA\1911  
 DATIM 16/Jan/2017 22:21:17  
 COMNT  
 OBNUC <sup>1</sup>H  
 EXMOD ZGPC30  
 OBFRQ 121.54 MH  
 Z  
 OBSET 0.0 kHz  
 OBFIN 10005.0 Hz  
 POINT 32768  
 FREQU 38535.64 Hz  
 SCANS 8  
 ACQTM 0.8503  
 S  
 PD 8.0 s  
 PFI 0.0 μs  
 TRNUC OFF  
 PROHD 5 MM BBO BB-IH-D Z-GR  
 D Z8284/01  
 INSTRW SPECT  
 PULSPRG ZGPC30  
 GRDPRG  
 CTEMP 26.85 °C  
 SLWT CDCL<sub>4</sub>  
 EXREF 158.537 p  
 BF <sup>pm</sup> 0.25 Hz  
 WINDOW Exponential  
 RGAIN 9195  
 Operator \_\_\_\_\_

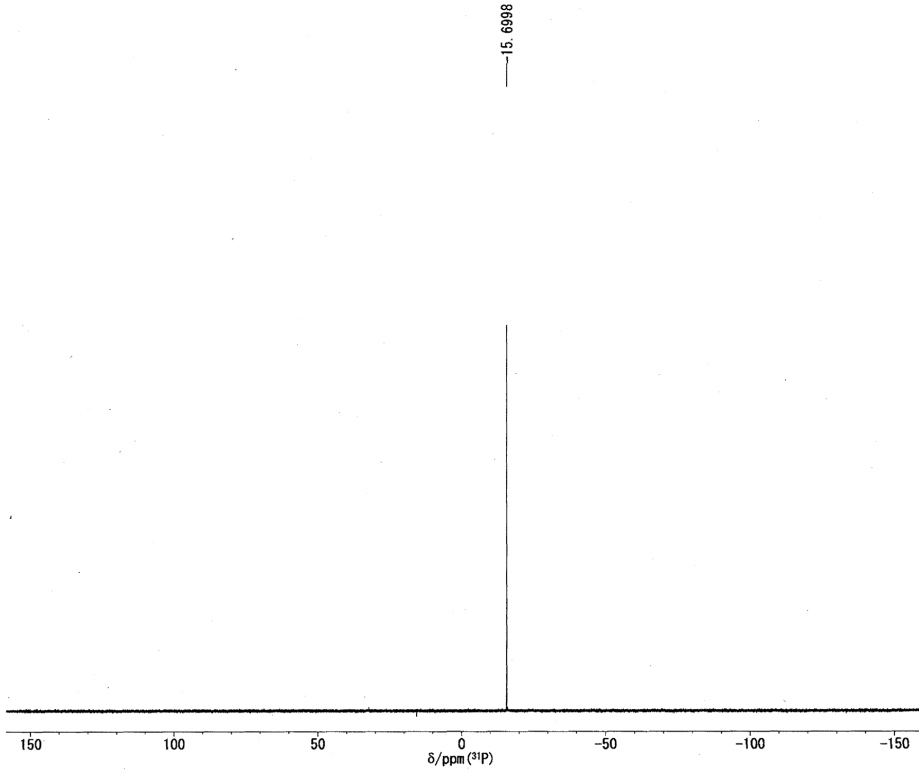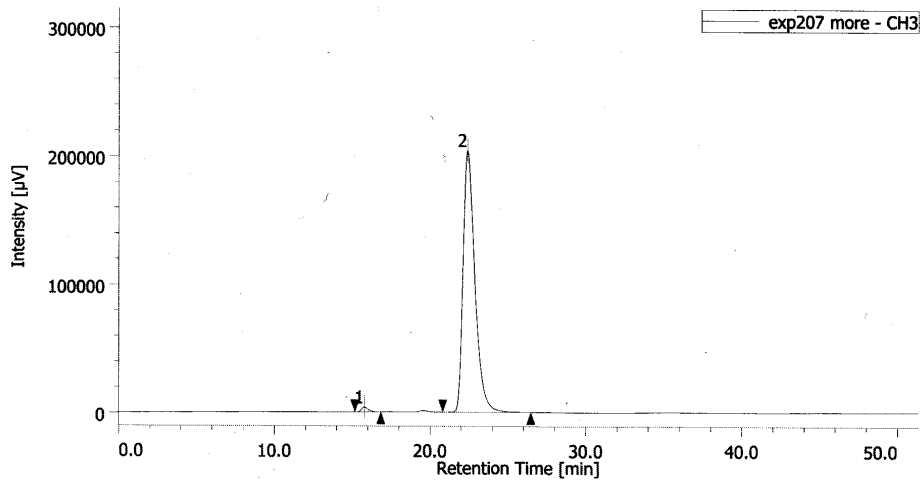

peak name area area%

| peak name | area   | area%           |
|-----------|--------|-----------------|
| Unknown 3 | 15.775 | 111654 1.043    |
| Unknown 3 | 22.392 | 10589311 98.957 |

<sup>1</sup>H, <sup>13</sup>C and <sup>31</sup>P NMR, and chiral phase HPLC chart of (S)-(+)-3c

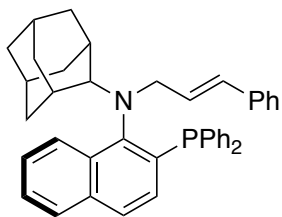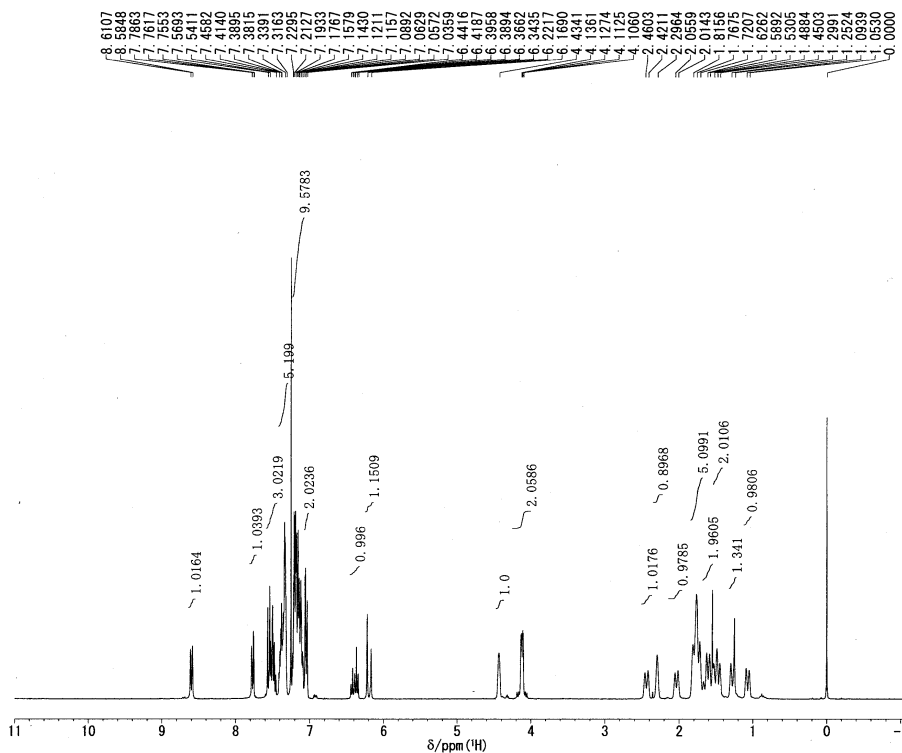

DFILE C:\KYOUSEI6\NMRY06\MINO20  
16V21640CV1VPDATA\1V11  
DATIM 11/Dec/2016 21:32:38  
COMNT

OBNUC <sup>1</sup>H  
EXMOD ZG30  
OBRFQ 300.23 MH  
Z  
ORSET 0.0 kHz  
OBFIN 10004.57 Hz  
POINT 16384  
FREQU 3612.717 H  
Z  
SCANS 16  
ACQTM 4.5351  
S  
PD 1.0 s  
PWI 9.0 μs  
IRNUC OFF  
PROBHD 5 MM BBO BB-1H-D Z-GR  
D Z8284/01  
INSTRUM SPECT  
PULSPRG ZG30  
GRDPRG  
CTEMP 26.85 °C  
SLVNT CDCL<sub>3</sub>  
EXREF 0.0 ppm  
BF 0.25 Hz  
WINDOW Exponential  
RGAIN 486  
Operator \_\_\_\_\_

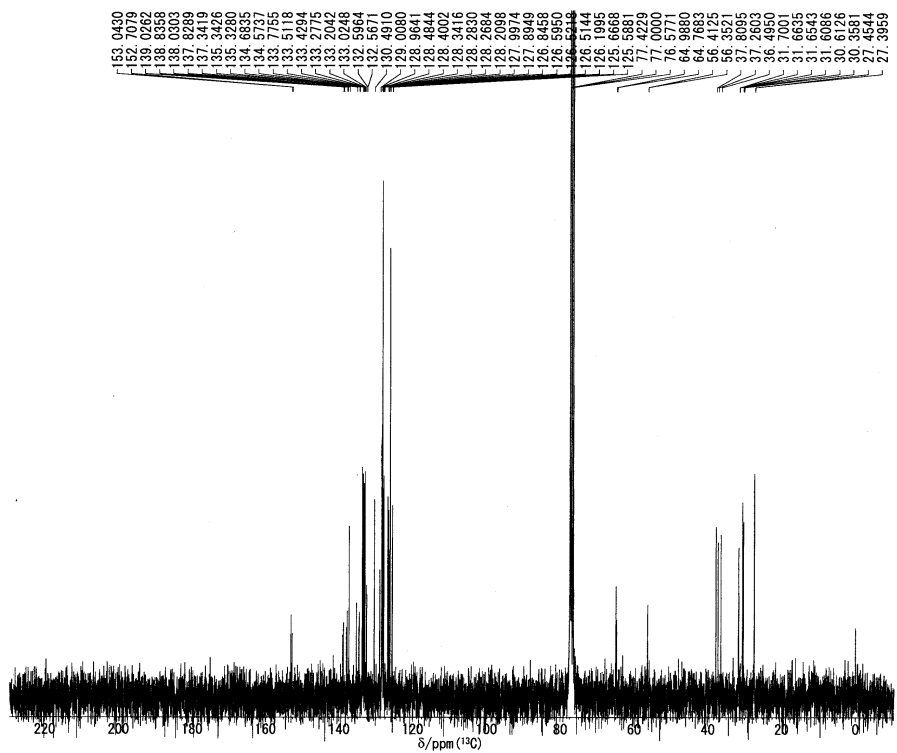

DFILE C:\KYOUSEI6\NMRY06\MINO20  
16V21640CV1VPDATA\1V11  
DATIM 11/Dec/2016 22:39:38  
COMNT

OBNUC <sup>13</sup>C  
EXMOD ZGPC30  
OBRFQ 75.49 MH  
Z  
ORSET 0.0 kHz  
OBFIN 10003.06 Hz  
POINT 32768  
FREQU 18115.94 Hz  
SCANS 1024  
ACQTM 1.8088  
S  
PD 2.0 s  
PWI 0.0 μs  
IRNUC OFF  
PROBHD 5 MM BBO BB-1H-D Z-GR  
D Z8284/01  
INSTRUM SPECT  
PULSPRG ZGPC30  
GRDPRG  
CTEMP 26.85 °C  
SLVNT CDCL<sub>3</sub>  
EXREF 77.0 ppm  
BF 0.25 Hz  
WINDOW Exponential  
RGAIN 2299  
Operator \_\_\_\_\_

D:\FILE C:\KYOUSEI6\NMR\06MINO20  
 16\21640P\11\DATA\11\11  
 DATIM 11/Dec/2016 22:46:47  
 COMNT

ORNUC <sup>31</sup>P  
 EXMOD ZGPC30  
 OFPRQ 121.54 MH  
 Z  
 ORSET 0.0 kHz  
 OFPIN 10005.0 Hz  
 POINT 32768  
 FREQU 38535.64 Hz  
 SCANS 16  
 ACQTM 0.8503  
 S  
 PD 8.0 s  
 FWI 0.0 μs  
 IRNUC OFF  
 PROBHD 5 MM BBO BB-1H-D Z-GR  
 D Z8284/01  
 INSTRUM SPECT  
 PULSPRG ZGPC30  
 GRDPRG  
 CTEMP 26.85 °C  
 SLOWT CDCL  
 EXREF 158.537 p  
 BP pm  
 WINDOW Exponential  
 RGAIN 9195  
 Operator \_\_\_\_\_

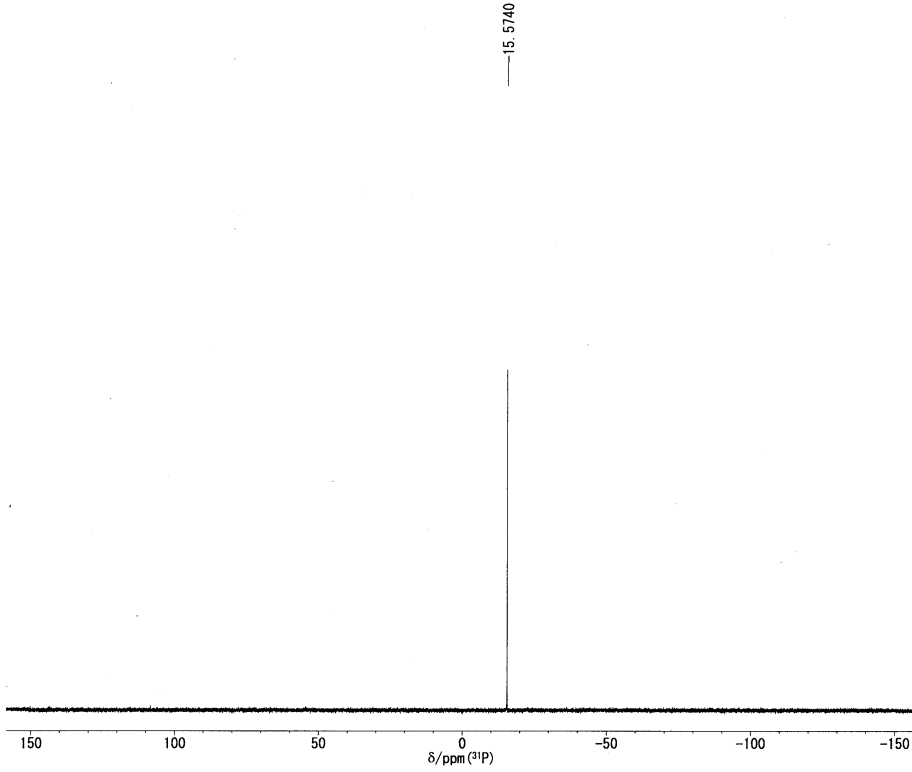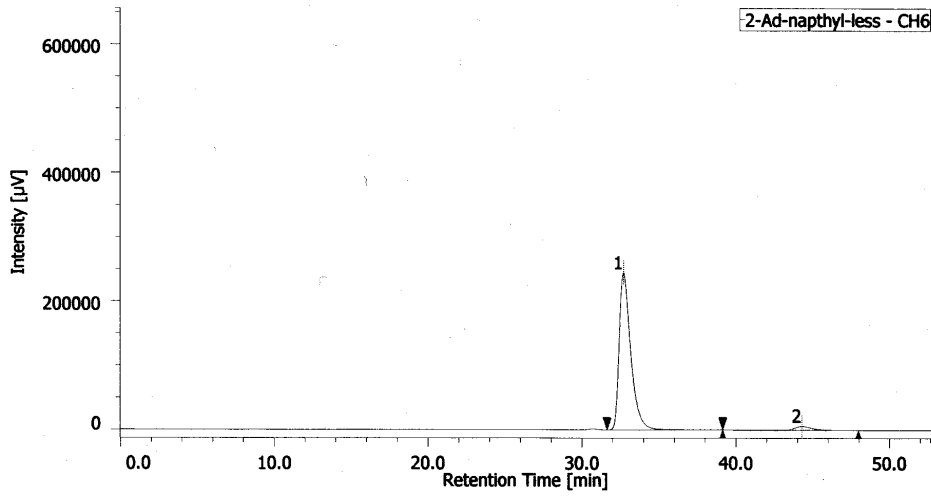

peak name area height area%

| # | Retention Time [min] | Area     | Height | Area%  |
|---|----------------------|----------|--------|--------|
| 1 | 32.693               | 12848301 | 244544 | 96.359 |
| 2 | 44.267               | 485470   | 6014   | 3.641  |

$^1\text{H}$ ,  $^{13}\text{C}$  and  $^{31}\text{P}$  NMR, and chiral phase HPLC chart of (*R*)-(-)-**3c**

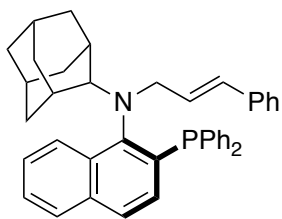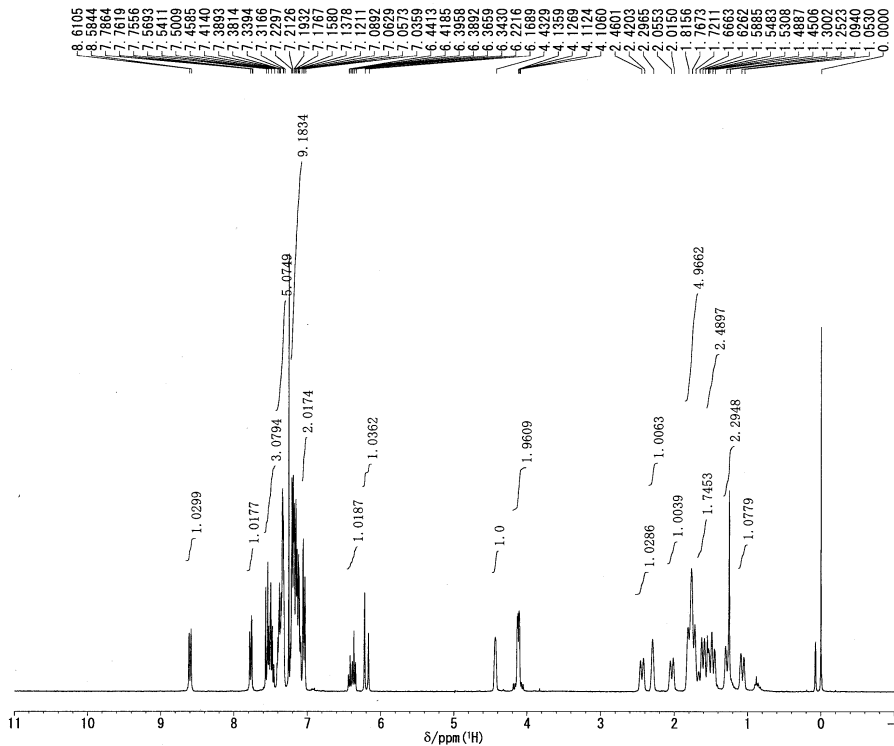

D:FILE C:\KYOUSEI\6NMRV06\MINO20  
16V21640HY2VPDATA\AV1V11  
DATIM 11/Dec/2016 23:46:41  
COMNT

OBNUC  $^1\text{H}$   
EXMOD ZG30  
OBFREQ 300.23 MH  
z  
OBSET 0.0 kHz  
OBFIN 10004.57 Hz  
POINT 16384  
FREQ 3612.717 H  
z  
SCANS 16  
ACQTM 4.5351  
s  
PD 1.0 s  
PFI 9.0  $\mu\text{s}$   
IRNUC OFF  
PROBHD 5 MM BBO BB-1H-D Z-GR  
D 28284/01  
INSTRM SPECT  
PULSPRG ZG30  
GRDPRG  
CTMP 26.85  $^{\circ}\text{C}$   
SLVNT  $\text{CDCl}_3$   
EXREF 0.0 ppm  
BF 0.25 Hz  
WINDOW Exponential  
RGAIN 575  
Operator \_\_\_\_\_

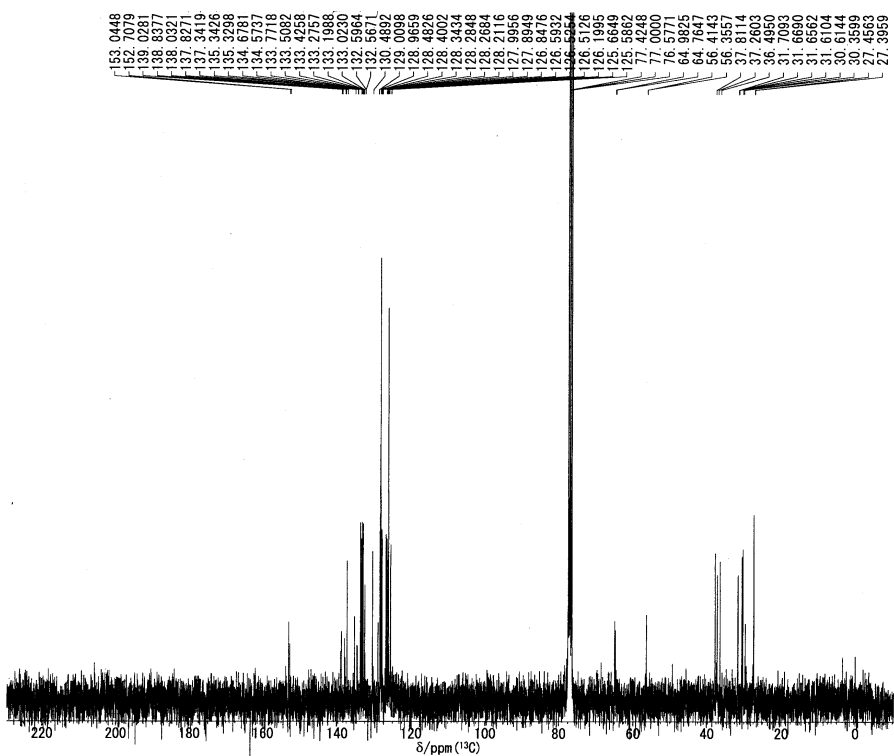

D:FILE C:\KYOUSEI\6NMRV06\MINO20  
16V21640CY2VPDATA\AV1V11  
DATIM 12/Dec/2016 00:59:31  
COMNT

OBNUC  $^{13}\text{C}$   
EXMOD ZGPC30  
OBFREQ 75.49 MH  
z  
OBSET 0.0 kHz  
OBFIN 10003.06 Hz  
POINT 32768  
FREQ 18115.94 Hz  
SCANS 1024  
ACQTM 1.8088  
s  
PD 2.0 s  
PFI 0.0  $\mu\text{s}$   
IRNUC OFF  
PROBHD 5 MM BBO BB-1H-D Z-GR  
D 28284/01  
INSTRM SPECT  
PULSPRG ZGPC30  
GRDPRG  
CTMP 26.85  $^{\circ}\text{C}$   
SLVNT  $\text{CDCl}_3$   
EXREF 77.0 ppm  
BF 0.25 Hz  
WINDOW Exponential  
RGAIN 5793  
Operator \_\_\_\_\_

DFILE C:\YKHOUSE16\NMR\Y06MIN020  
 16Y21640PV2\PDAT\Y1Y11  
 DATIM 11/Dec/2016 23:50:50  
 COMNT  
 ORNUC <sup>31</sup>P  
 EXMOD ZGPC30  
 ORFRQ 121.54 MH  
 Z  
 OBSET 0.0 kHz  
 OBFTM 10005.0 Hz  
 POINT 32768  
 PREQU 38535.64 Hz  
 SCANS 16  
 ACQTM 0.8503  
 S  
 PD 8.0 s  
 PW1 0.0 μs  
 TRNUC OFP  
 PROBHD 5 MM BBO BB-1H-D Z-GR  
 D Z8284/01  
 INSTRUM SPECT  
 PULSPRG ZGPC30  
 GRDPROG  
 CTEMP 26.85 °C  
 SLVNT CDCL<sub>3</sub>  
 EXREF 158.537 p  
 pm  
 BF 0.25 Hz  
 WINDOW Exponential  
 RGAIN 11585  
 Operator \_\_\_\_\_

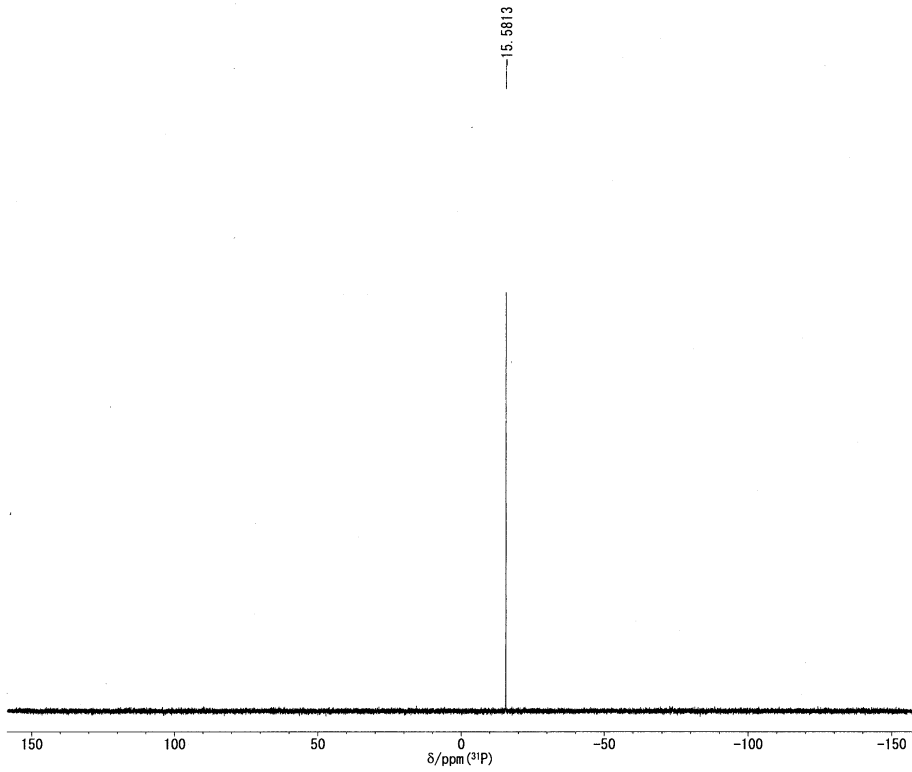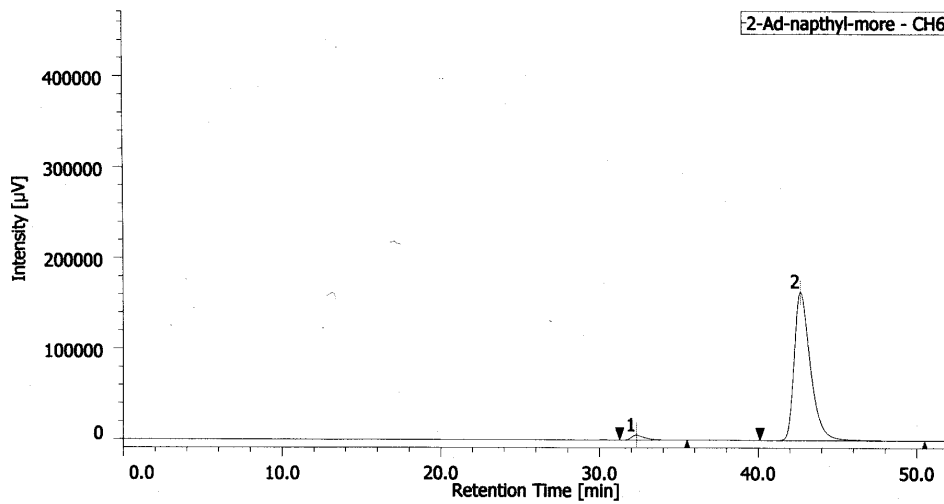

peak name area height area%

| peak | name    | area | height | area%    |        |        |
|------|---------|------|--------|----------|--------|--------|
| 1    | Unknown | 6    | 32.307 | 329660   | 5611   | 2.750  |
| 2    | Unknown | 6    | 42.653 | 11656865 | 163694 | 97.250 |

<sup>1</sup>H, <sup>13</sup>C and <sup>31</sup>P NMR, and chiral phase HPLC chart of (+)-**3d**

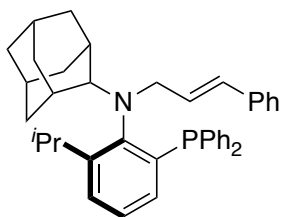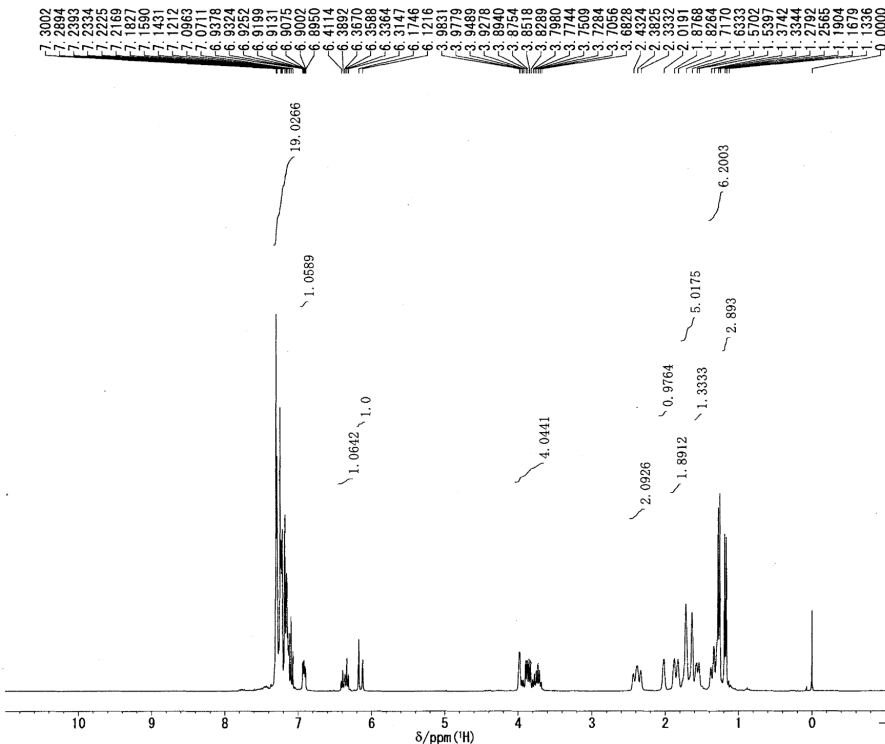

DFILE C:\KYOUSEI6NMR\VO6MINO20  
16V21636HV1PDATA\V111  
DATIM 10/Dec/2016 03:03:41  
COMNT

OBNUC <sup>1</sup>H  
EXMOD ZG30  
OBFRQ 300.23 MH  
z  
OBSET 0.0 kHz  
OBFIN 10004.57 Hz  
POINT 16384  
FREQU 3612.717 H  
SCANS 16  
ACQTM 4.5351  
s  
PD 1.0 s  
PWI 9.0 μs  
IRNUC OFF  
PROBHD 5 MM BBO BB-1H-D Z-GR  
D 28284/01  
INSTRUM SPECT  
PULSPRG ZG30  
GRDPRG  
CTEMP 26.85 °C  
SLVNT CDCL<sub>3</sub>  
EXREF 0.0 ppm  
BS 0.25 Hz  
WINDOW Exponential  
RGAIN 256  
Operator \_\_\_\_\_

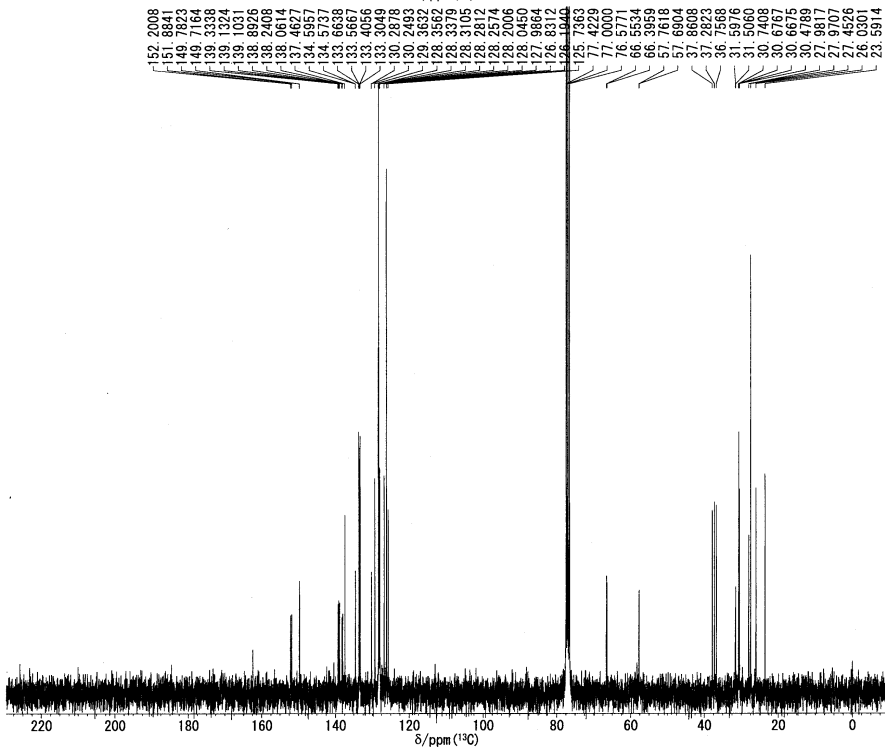

DFILE C:\KYOUSEI6NMR\VO6MINO20  
16V21636CY1PDATA\V111  
DATIM 10/Dec/2016 04:10:42  
COMNT

OBNUC <sup>13</sup>C  
EXMOD ZGPC30  
OBFRQ 75.49 MH  
z  
OBSET 0.0 kHz  
OBFIN 10003.06 Hz  
POINT 32768  
FREQU 18115.94 Hz  
SCANS 1024  
ACQTM 1.8088  
s  
PD 2.0 s  
PWI 0.0 μs  
IRNUC OFF  
PROBHD 5 MM BBO BB-1H-D Z-GR  
D 28284/01  
INSTRUM SPECT  
PULSPRG ZGPC30  
GRDPRG  
CTEMP 26.85 °C  
SLVNT CDCL<sub>3</sub>  
EXREF 77.0 ppm  
BS 0.25 Hz  
WINDOW Exponential  
RGAIN 2299  
Operator \_\_\_\_\_

DFILE C:\YKYOUSEI6MMRY06MIN020  
 16Y21636PW1WPDATAV1V11  
 DATIM 10/Dec/2016 04:50:27  
 COMNT  
 OBNUC <sup>31</sup>P  
 EXMOD ZGPG30  
 OBFRQ 121.54 MH  
 z  
 OBSET 0.0 kHz  
 OBFTM 10005.0 Hz  
 POINT 32768  
 FREQU 38535.64 Hz  
 SCANS 16  
 ACQTM 0.8503 s  
 PD 8.0 s  
 PW 0.0 μs  
 TRNUC OFF  
 PROBHD 5 MM BBO BB-1H-D Z-GR  
 D Z8284/01  
 INSTRUM SPECT  
 PULSPRG ZGPG30  
 GRDPRG  
 CTEMP 26.85 °C  
 SLVNT CDCL<sub>3</sub>  
 EXREF 158.537 p  
 pm  
 BF 0.25 Hz  
 WINDOW Exponential  
 RGAIN 2896  
 Operator \_\_\_\_\_

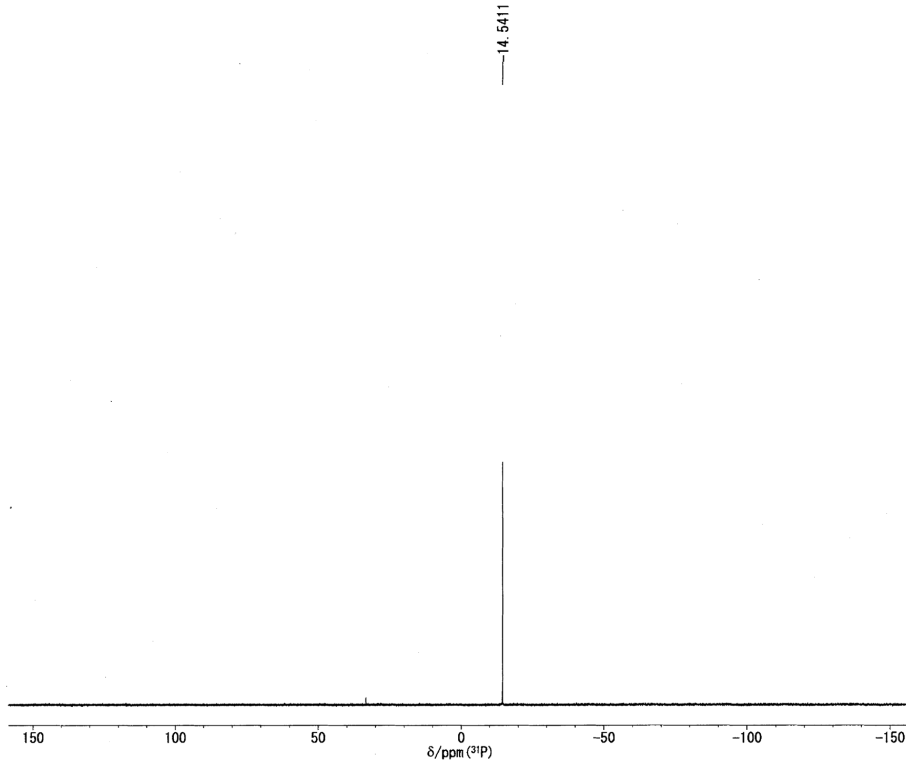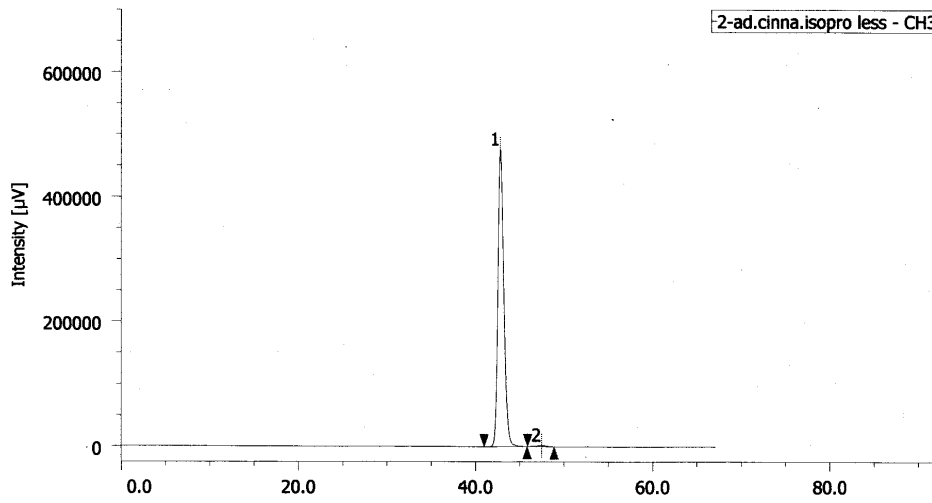

peak name                      area                      height                      area%

| # | CH      | IR [cm <sup>-1</sup> ] | Area [μV·s] | Height [μV] | Area%  |        |
|---|---------|------------------------|-------------|-------------|--------|--------|
| 1 | Unknown | 3                      | 42.792      | 21993084    | 476599 | 99.475 |
| 2 | Unknown | 3                      | 47.442      | 116044      | 1883   | 0.525  |





```

D:\FILE C:\KYOUSEI6\NRV06M\IN020
18921636P42\PDAT\11111
DATIM 10/Dec/2016 09:01:26
COMNT
OBNUC 31P
EXMOD ZFGP30
OBFRQ 121.54 MH
Z
OSSET 0.0 kHz
OBFIN 10005.0 Hz
POINT 32768
FREQU 38538.64 Hz
SCANS 16
ACQTM 0.8503
S
PD 8.0 s
PW1 0.0 μs
IRNUC OFF
PROBHD 5 MM BBO BB-1H-D Z-GR
D Z8284/01
INSTRUM SPECT
PULSPRG ZFGP30
GROPRG
CTEMP 26.85 °C
SLWT CDCL3
EXREF 158.537 p
PM
BF 0.25 Hz
WINDOW Exponential
RGAIN 2896
Operator _____

```

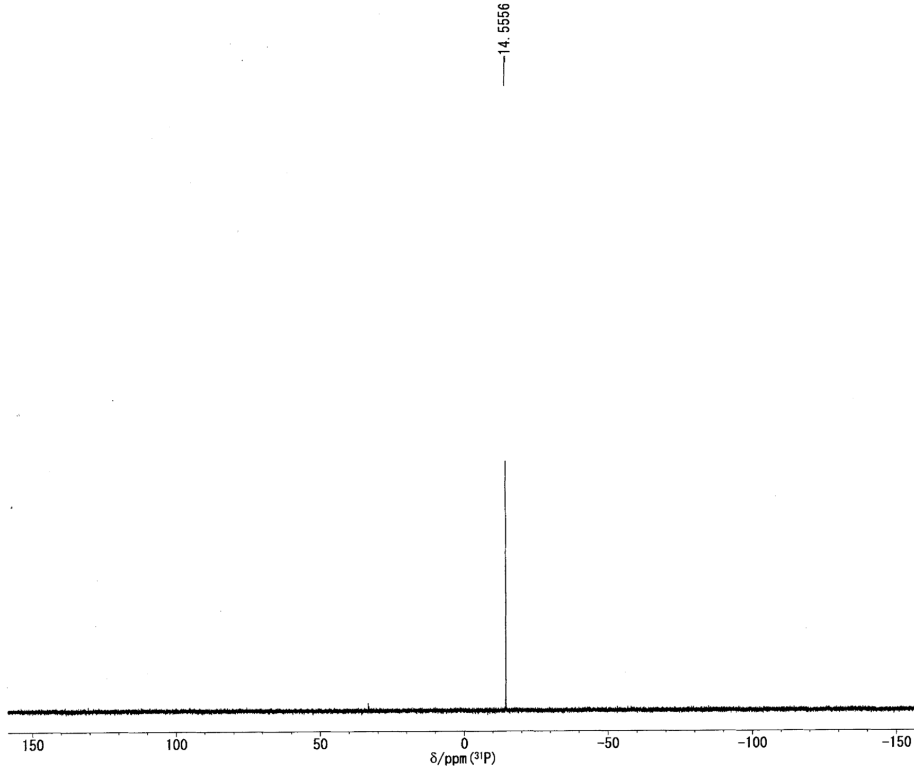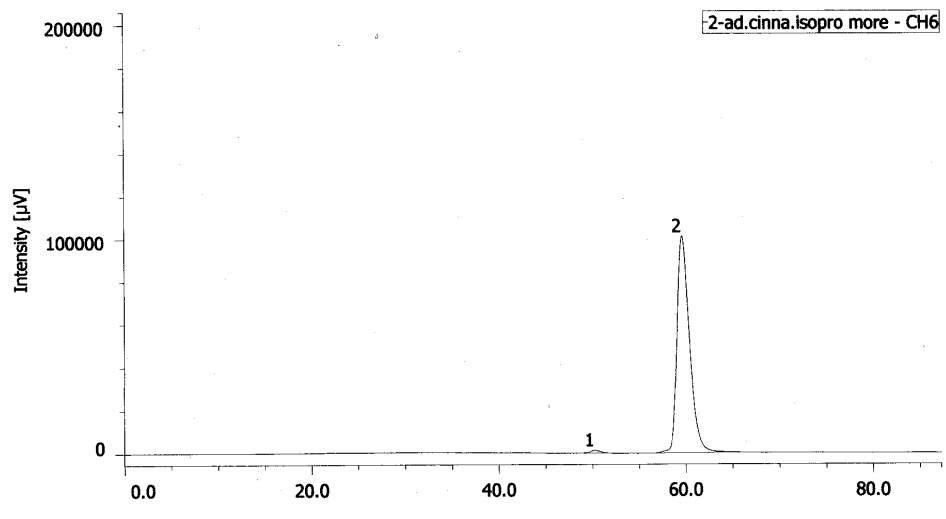

| peak name | area    | height | area%  |
|-----------|---------|--------|--------|
| 1 Unknown | 105070  | 1329   | 1.102  |
| 2 Unknown | 9429093 | 101038 | 98.898 |

<sup>1</sup>H and <sup>13</sup>C NMR, and chiral phase HPLC chart of (*R*)-**9a** (Table 3, entry 1)

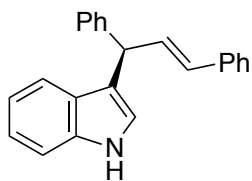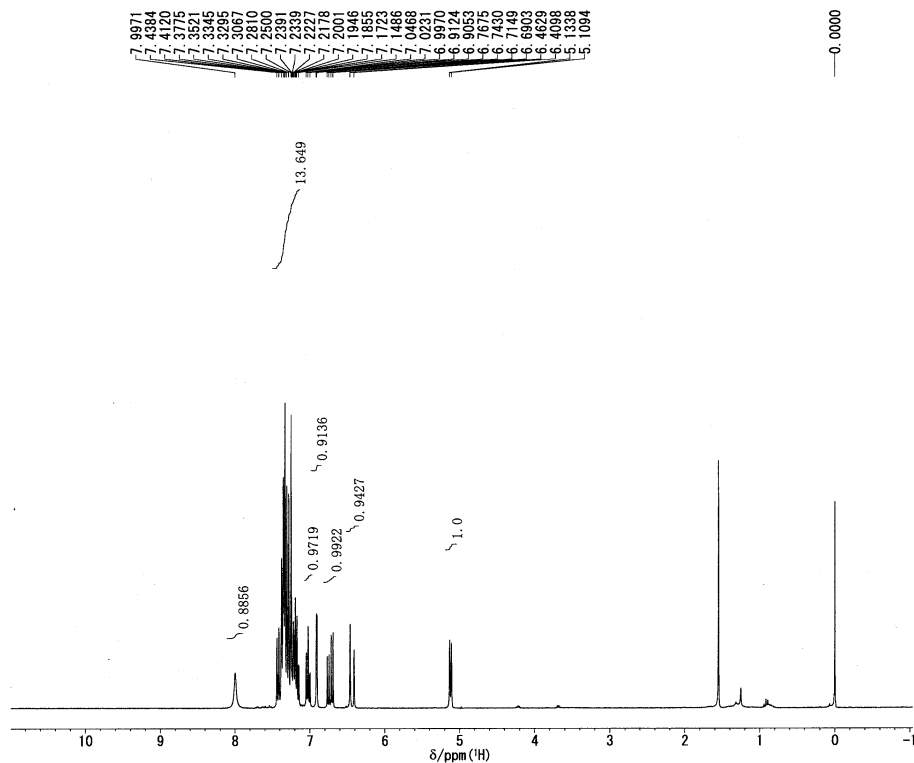

DFILE C:\KYOUSEI6\NMR\VO6MIN020  
16921493C\2\PD\DATA\1111  
DATIM 28/Oct/2016 10:59:13  
COMNT

OBNUC <sup>1</sup>H  
EXMOD ZG30  
OBFREQ 300.23 MH  
Z  
OBSET 0.0 kHz  
OBFIN 10004.57 Hz  
POINT 16384  
FREQU 3612.717 H  
SCANS 16  
ACQTM 4.5351  
S  
PD 1.0 s  
PW1 9.0 μs  
IRNUC OFF  
PROBHD 5 MM BBO BB-1H-D Z-GR  
D Z8284/01  
INSTRUM SPECT  
PULSPRG ZG30  
GRDPRG  
CTEMP 26.85 °C  
SLVNT CDCl<sub>3</sub>  
EXREF 0.0 ppm  
BF 0.25 Hz  
WINDOW Exponential  
RGAIN 575

Operator \_\_\_\_\_

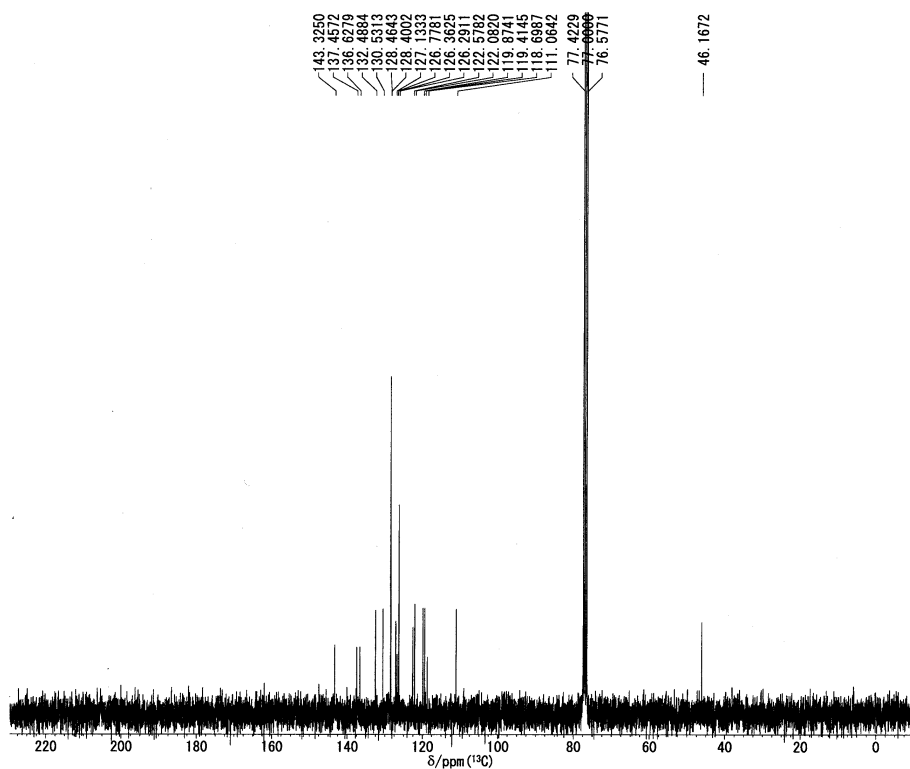

DFILE C:\KYOUSEI6\NMR\VO6MIN020  
16921493C\2\PD\DATA\1111  
DATIM 28/Oct/2016 18:43:37  
COMNT

OBNUC <sup>13</sup>C  
EXMOD ZPG30  
OBFREQ 75.49 MH  
Z  
OBSET 0.0 kHz  
OBFIN 10003.06 Hz  
POINT 32768  
FREQU 18115.94 Hz  
SCANS 512  
ACQTM 1.8088  
S  
PD 2.0 s  
PW1 0.0 μs  
IRNUC OFF  
PROBHD 5 MM BBO BB-1H-D Z-GR  
D Z8284/01  
INSTRUM SPECT  
PULSPRG ZPG30  
GRDPRG  
CTEMP 26.85 °C  
SLVNT CDCl<sub>3</sub>  
EXREF 77.0 ppm  
BF 0.25 Hz  
WINDOW Exponential  
RGAIN 2580

Operator \_\_\_\_\_

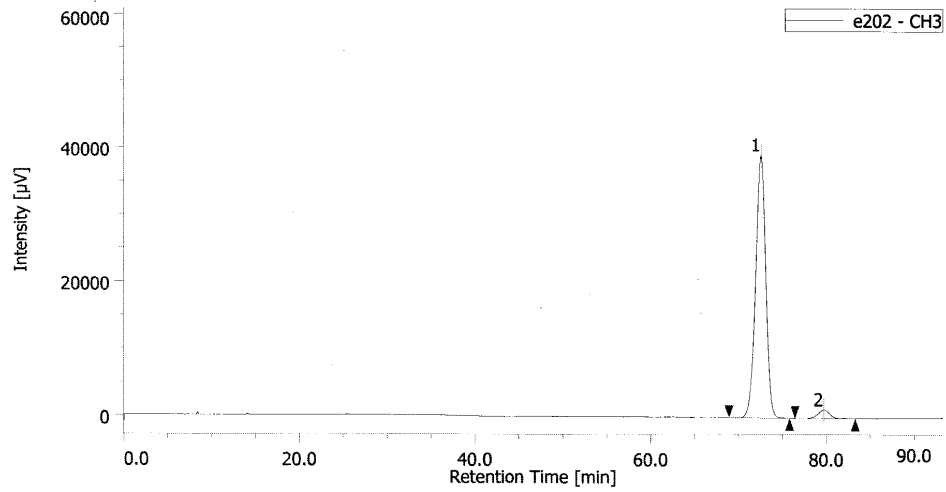

peak name

| # | ピーク名    | CH | tR [min] | area [ $\mu\text{V}\cdot\text{sec}$ ] | area%  |
|---|---------|----|----------|---------------------------------------|--------|
| 1 | Unknown | 3  | 72.500   | 3127948                               | 96.604 |
| 2 | Unknown | 3  | 79.683   | 109944                                | 3.396  |

( $\pm$ )-**9a**

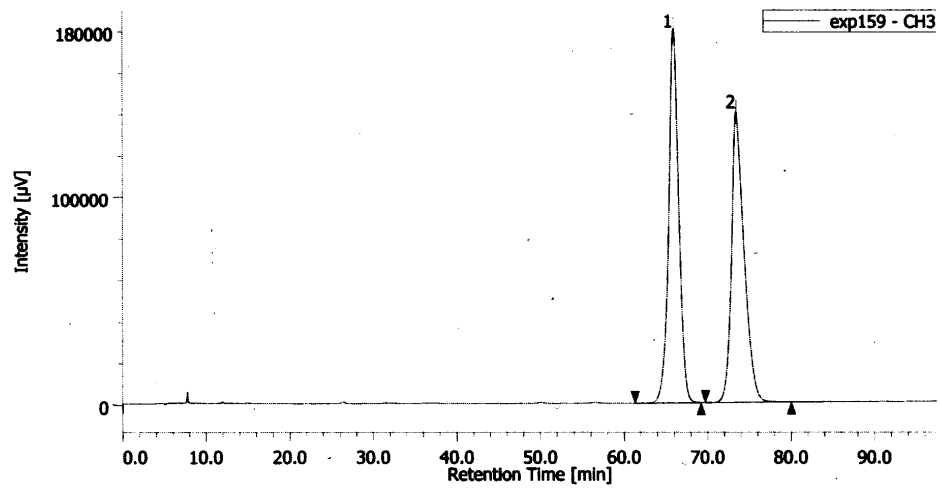

<sup>1</sup>H and <sup>13</sup>C NMR, and chiral phase HPLC chart of (*S*)-**9a** (Table 2, entry 11)

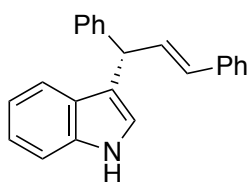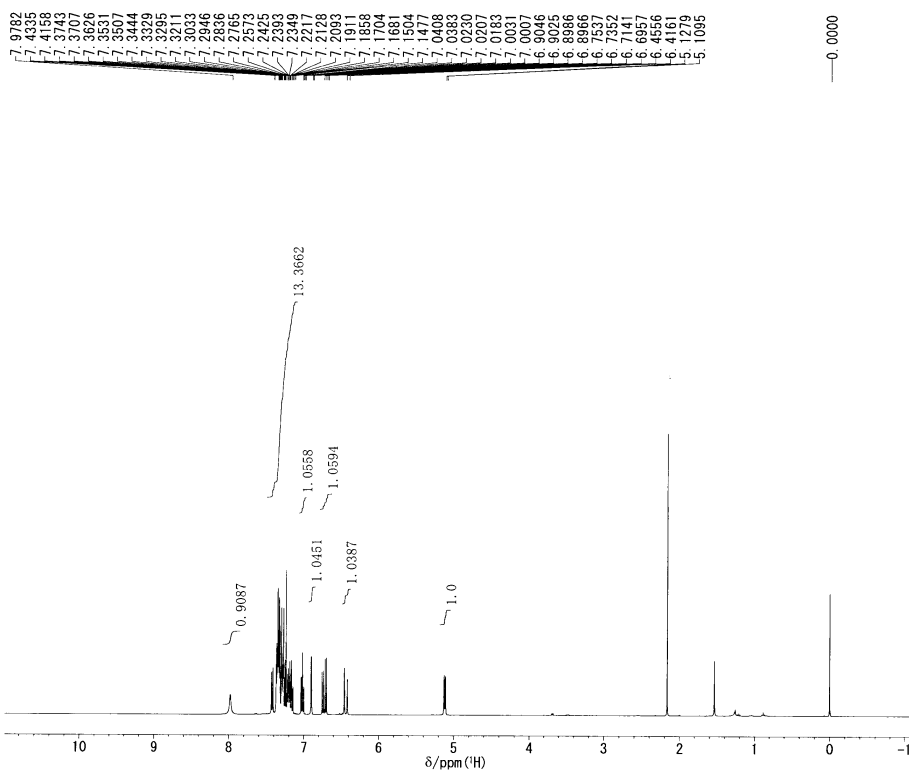

```

DFILE C:\KYOUSEI6\NMR\06M\N0201
      8Y4-00315H\1P\DATA\1Y11
DATIM 19/Dec/2018 16:21:15
COMNT

ORNUC 1H
EXMOD ZG30
OBFREQ 400.18 MHz
OBSETE 0.0 kHz
OBFIN 10003.83 Hz
POINT 45536
FREQU 4826.255 Hz
SCANS 19
ACQTM 13.5791 s
PD 1.0 s
PWI 14.0 μs
IRNUC OFF
PROBHD Z108618-0111 (PA BBO 4
      OOS1 BBF-H-D-05 Z PLUS)
INSTRUM SPECT
PULSPRG ZG30
GRDPRG
CTEMP 24.21 °C
SLVNT CDCl3
EXREF 10.989 ppm
      =
BF 0.25 Hz
WINDOW Exponential
RGAIN 203

Operator
    
```

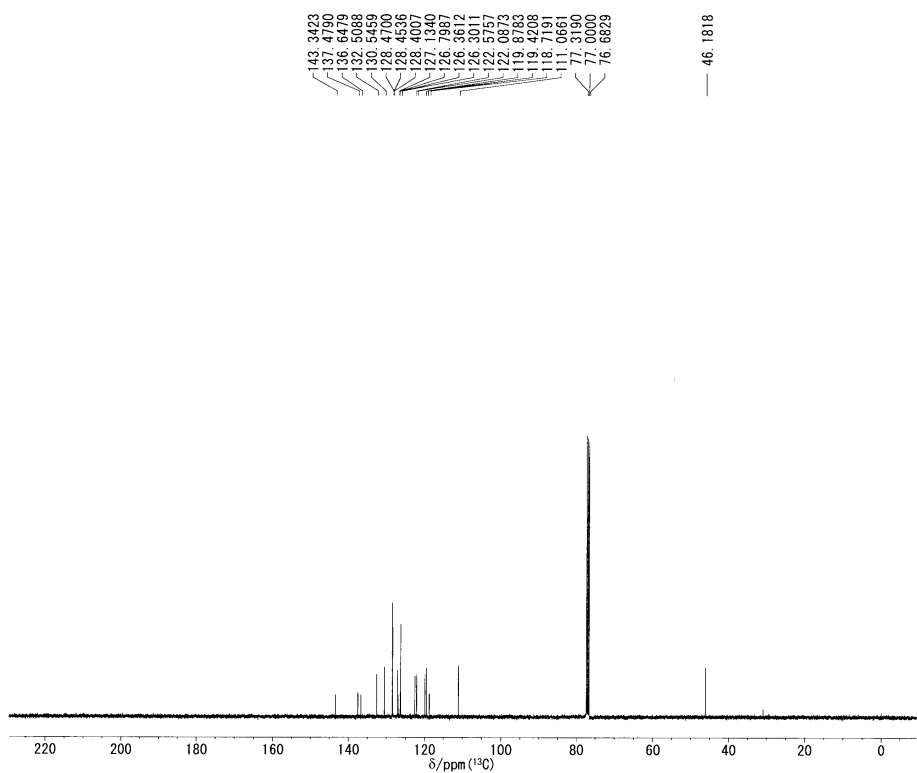

```

DFILE C:\KYOUSEI6\NMR\06M\N0201
      8Y4-00315CY\1P\DATA\1Y11
DATIM 19/Dec/2018 16:37:53
COMNT

ORNUC 13C
EXMOD ZGPC30
OBFREQ 100.63 MHz
OBSETE 0.0 kHz
OBFIN 9998.39 Hz
POINT 32768
FREQU 24038.46 Hz
SCANS 273
ACQTM 1.3631 s
PD 2.0 s
PWI 10.0 μs
IRNUC OFF
PROBHD Z108618-0111 (PA BBO 4
      OOS1 BBF-H-D-05 Z PLUS)
INSTRUM SPECT
PULSPRG ZGPC30
GRDPRG
CTEMP 25.01 °C
SLVNT CDCl3
EXREF 77.0 ppm
BF 0.25 Hz
WINDOW Exponential
RGAIN 203

Operator
    
```

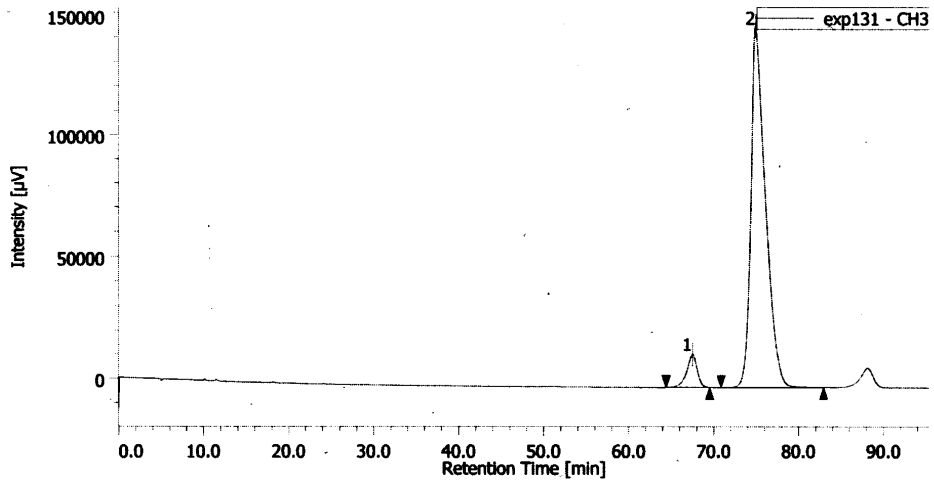

peak name      area      height    area%

| # | ピーク名    | CH | tR [min] | 面積 [μV·sec] | 高さ [μV] | 面積%    |
|---|---------|----|----------|-------------|---------|--------|
| 1 | Unknown | 3  | 67.492   | 1163406     | 13523   | 6.217  |
| 2 | Unknown | 3  | 74.967   | 17549119    | 147977  | 93.783 |

(±)-9a

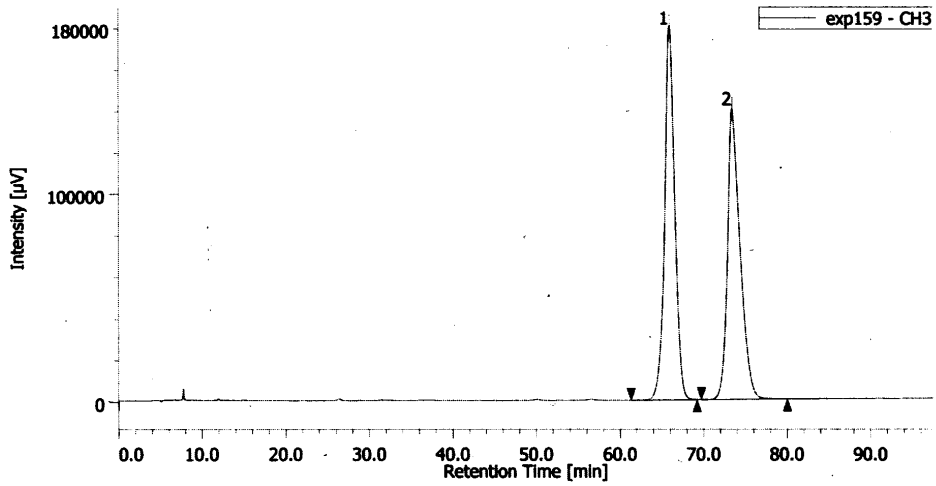

<sup>1</sup>H and <sup>13</sup>C NMR, and chiral phase HPLC chart of (*R*)-**9b** (Table 3, entry 2)

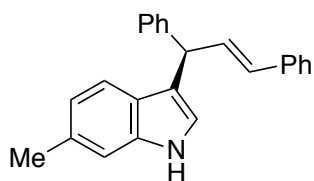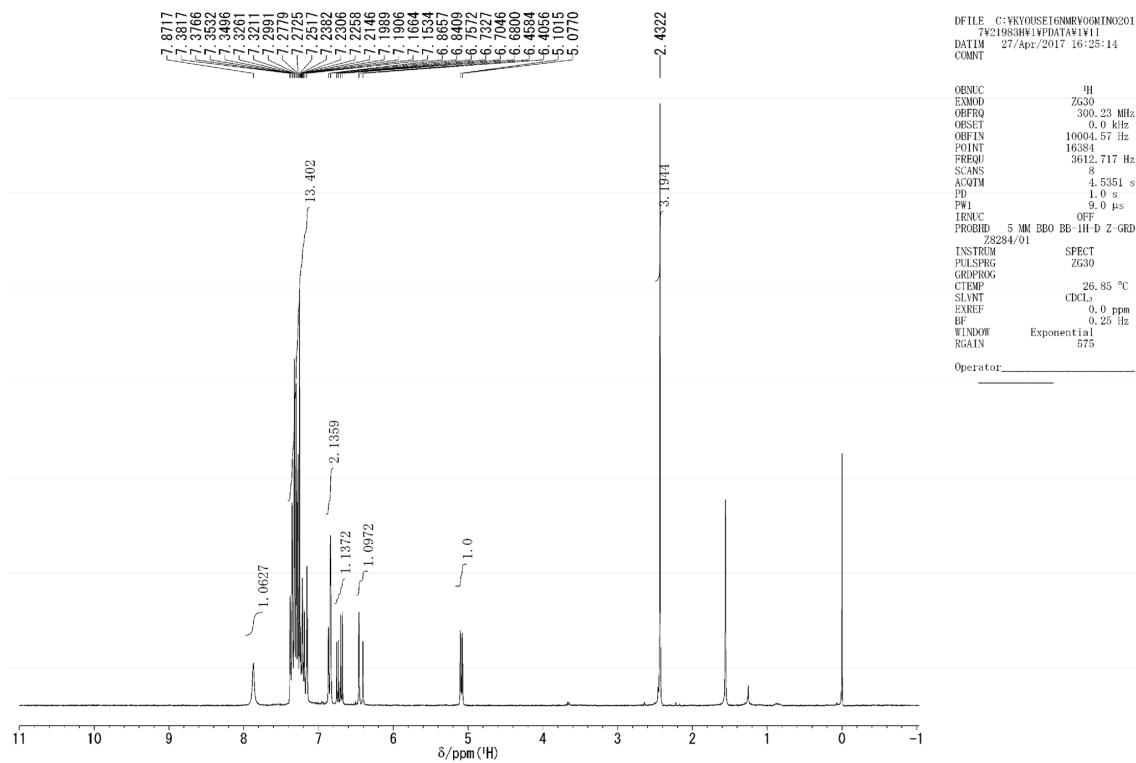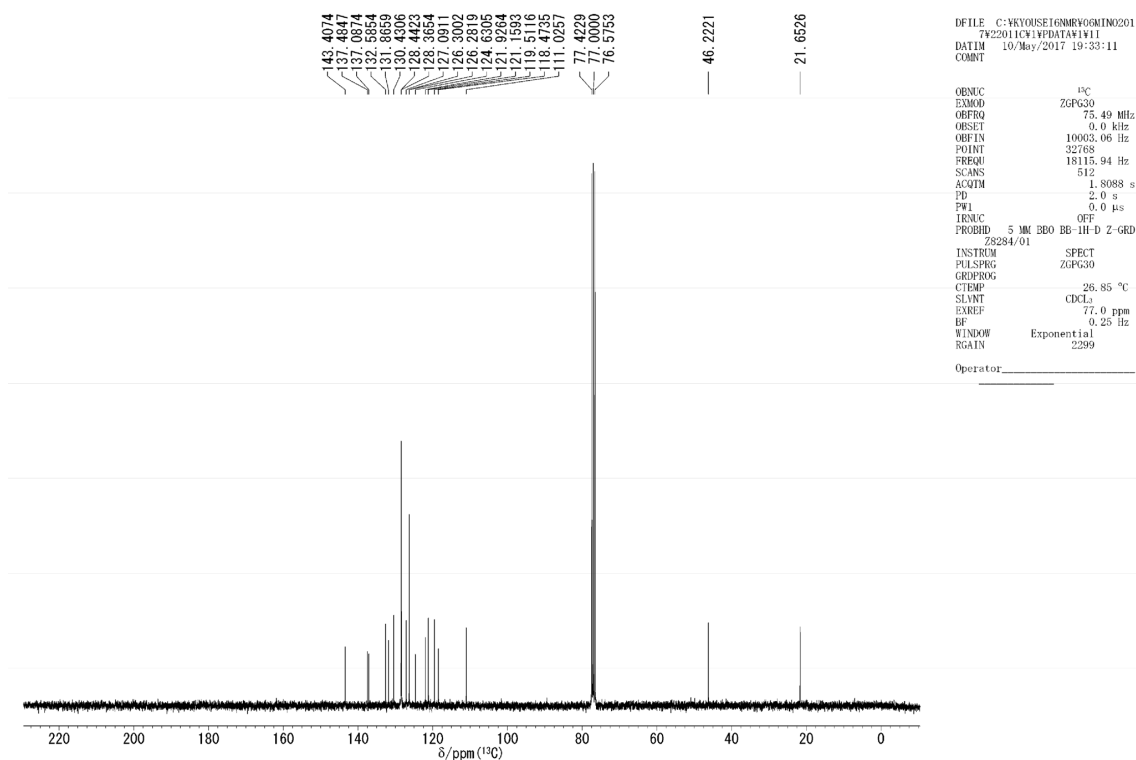

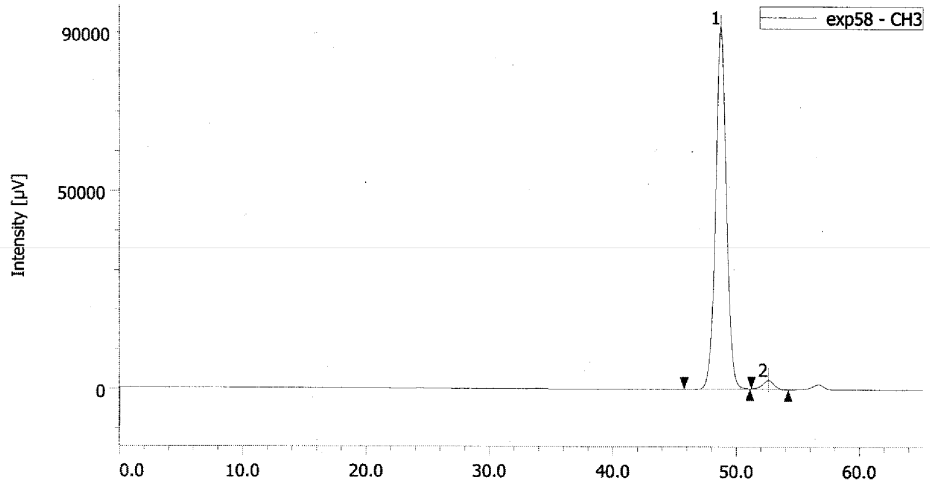

peak name

| # | ピーク名    | CH | tR [min] | area [ $\mu\text{V}\cdot\text{sec}$ ] | area%  |
|---|---------|----|----------|---------------------------------------|--------|
| 1 | Unknown | 3  | 48.7     | 5491026                               | 97.547 |
| 2 | Unknown | 3  | 52.6     | 138061                                | 2.453  |

( $\pm$ )-9b

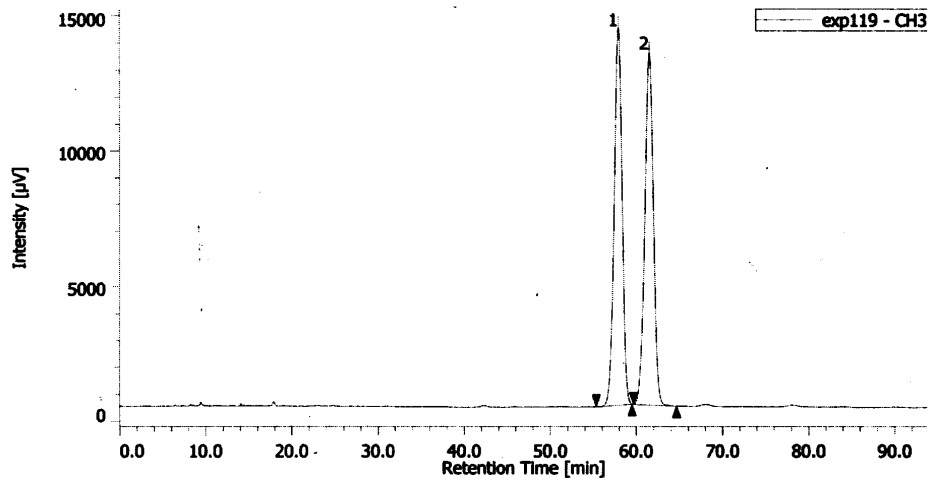



<sup>1</sup>H and <sup>13</sup>C NMR, and chiral phase HPLC chart of (*R*)-**9c** (Table 3, entry 3)

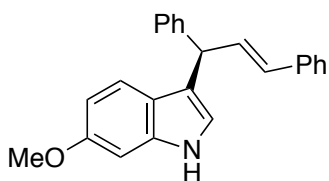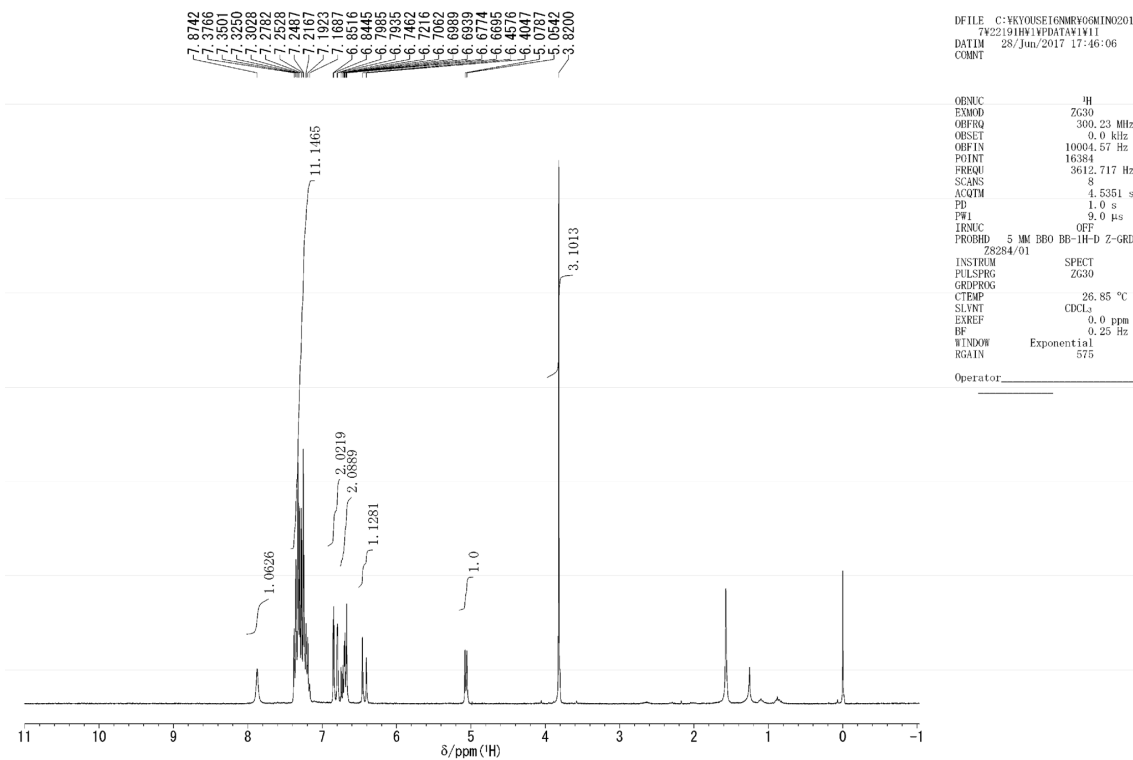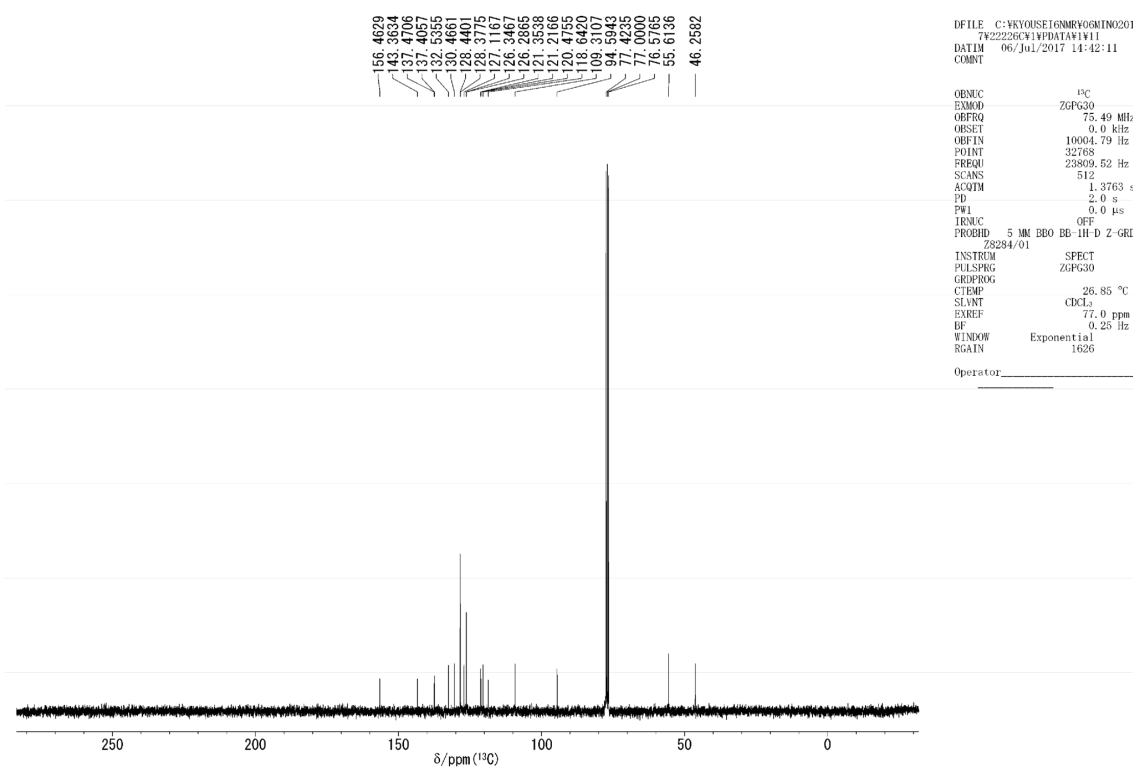

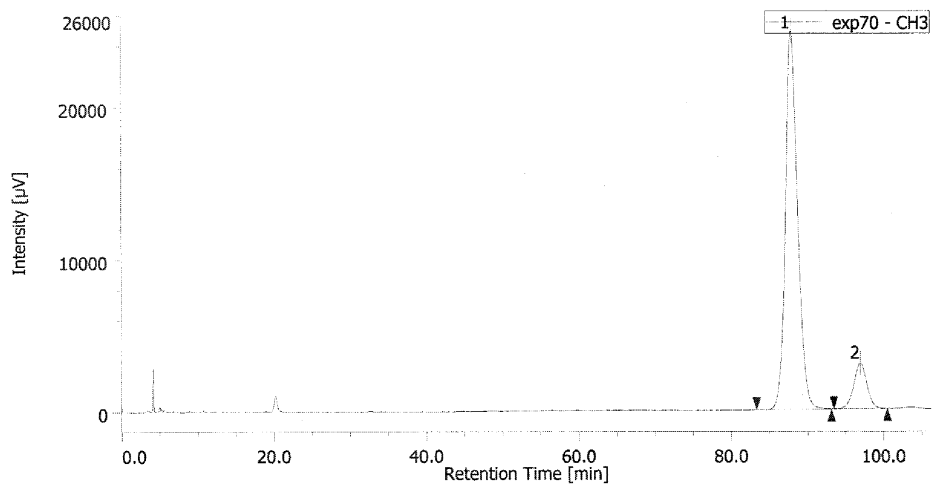

peak name

| # | ピーク名    | CH | tR [min] | area [μV·sec] | area%  |
|---|---------|----|----------|---------------|--------|
| 1 | Unknown | 3  | 87.867   | 2733858       | 88.415 |
| 2 | Unknown | 3  | 96.950   | 358203        | 11.585 |

(±)-9c

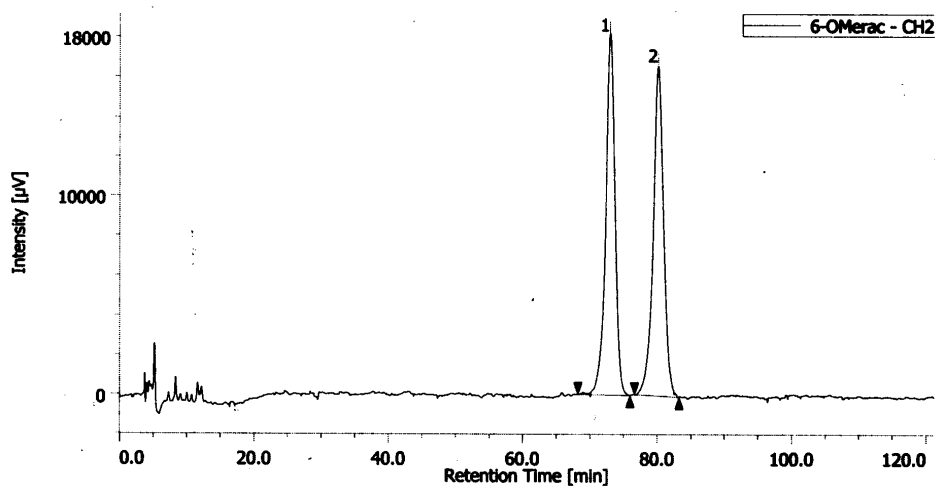

<sup>1</sup>H and <sup>13</sup>C NMR, and chiral phase HPLC chart of (*R*)-**9d** (Table 3, entry 4)

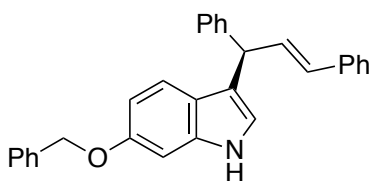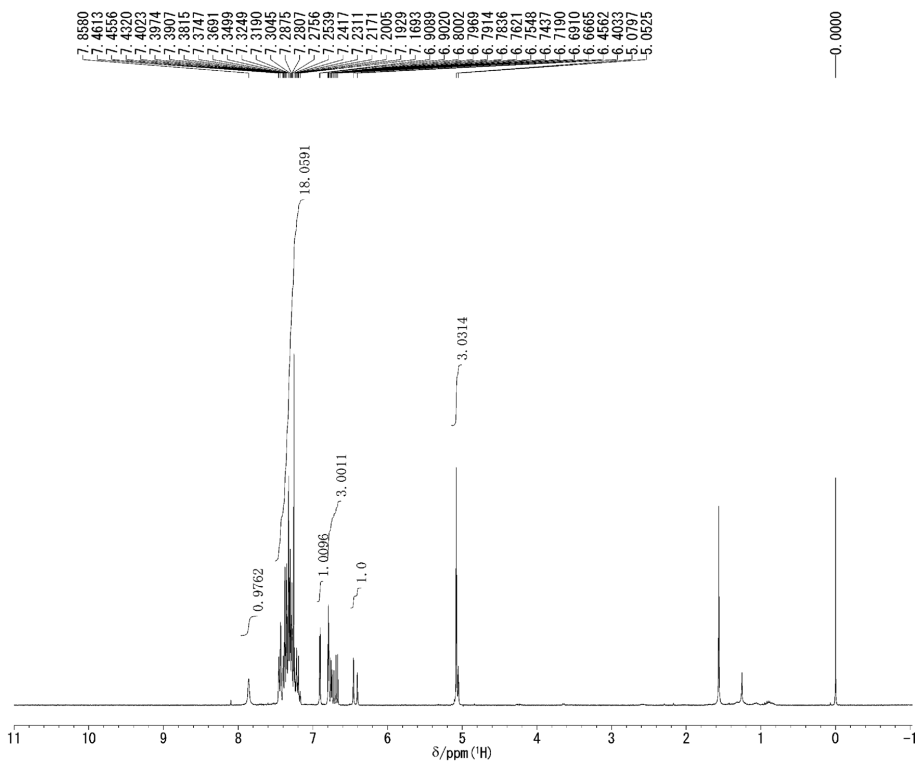

D\FILE C:\KYOUSEI\6NMR\6MIN0201  
7\22112PH1\PDAT\1\111  
DATEM 09/Jun/2017 15:26:59  
COMNT

ORNUC <sup>1</sup>H  
EXMOD ZG30  
OBFRQ 300.23 MHz  
ORSET 0.0 kHz  
OBFIN 10004.57 Hz  
POINT 16384  
FREQC 3612.717 Hz  
SCANS 8  
AQTM 4.5351 s  
PD 1.0 s  
PFI 9.0 μs  
IRNUC OFF  
PROBHD 5 MM BBO BB-1H-D Z-GRD  
28284/01  
INSTRM SPECT  
PULSPRG ZG30  
GRDPRG  
CTEMP 26.85 °C  
SLVNT CDCl<sub>3</sub>  
EXREF 0.0 ppm  
BF 0.25 Hz  
WINDOW Exponential  
RGAIN 575  
Operator \_\_\_\_\_

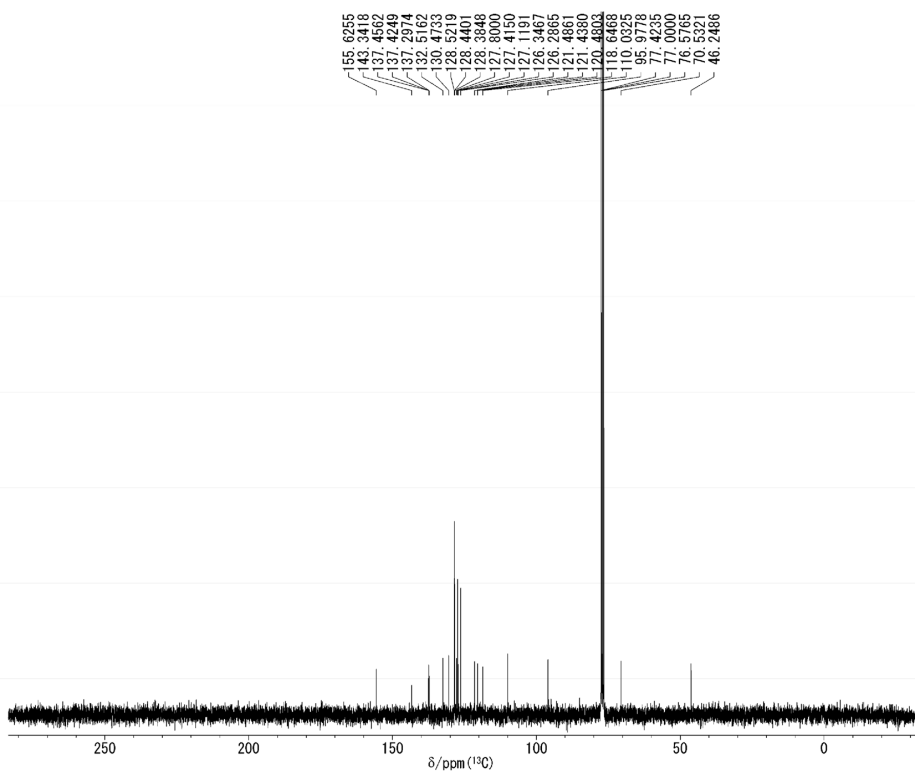

D\FILE C:\KYOUSEI\6NMR\6MIN0201  
7\22112PH1\PDAT\1\111  
DATEM 16/Jun/2017 16:36:59  
COMNT

ORNUC <sup>13</sup>C  
EXMOD ZPG30  
OBFRQ 75.49 MHz  
ORSET 0.0 kHz  
OBFIN 10004.79 Hz  
POINT 32768  
FREQC 23809.52 Hz  
SCANS 512  
AQTM 1.3763 s  
PD 2.0 s  
PFI 0.0 μs  
IRNUC OFF  
PROBHD 5 MM BBO BB-1H-D Z-GRD  
28284/01  
INSTRM SPECT  
PULSPRG ZPG30  
GRDPRG  
CTEMP 26.85 °C  
SLVNT CDCl<sub>3</sub>  
EXREF 77.0 ppm  
BF 0.25 Hz  
WINDOW Exponential  
RGAIN 4598  
Operator \_\_\_\_\_

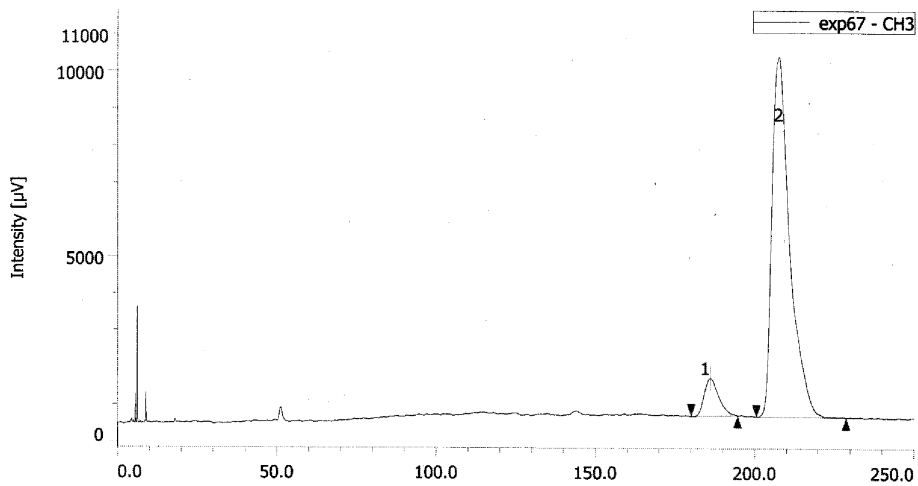

peak name

| # | ピーク名    | CH | TR [min] | area [μV·sec] | area%  |
|---|---------|----|----------|---------------|--------|
| 1 | Unknown | 3  | 186      | 315738        | 7.711  |
| 2 | Unknown | 3  | 209      | 3778805       | 92.289 |

(±)-9d

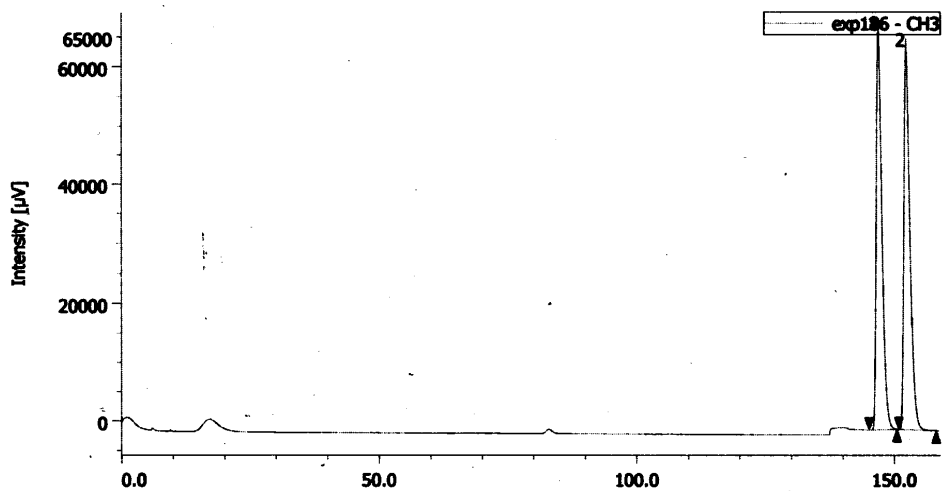

<sup>1</sup>H and <sup>13</sup>C NMR, and chiral phase HPLC chart of (*R*)-**9e** (Table 3, entry 5)

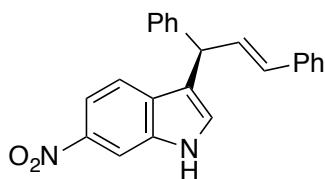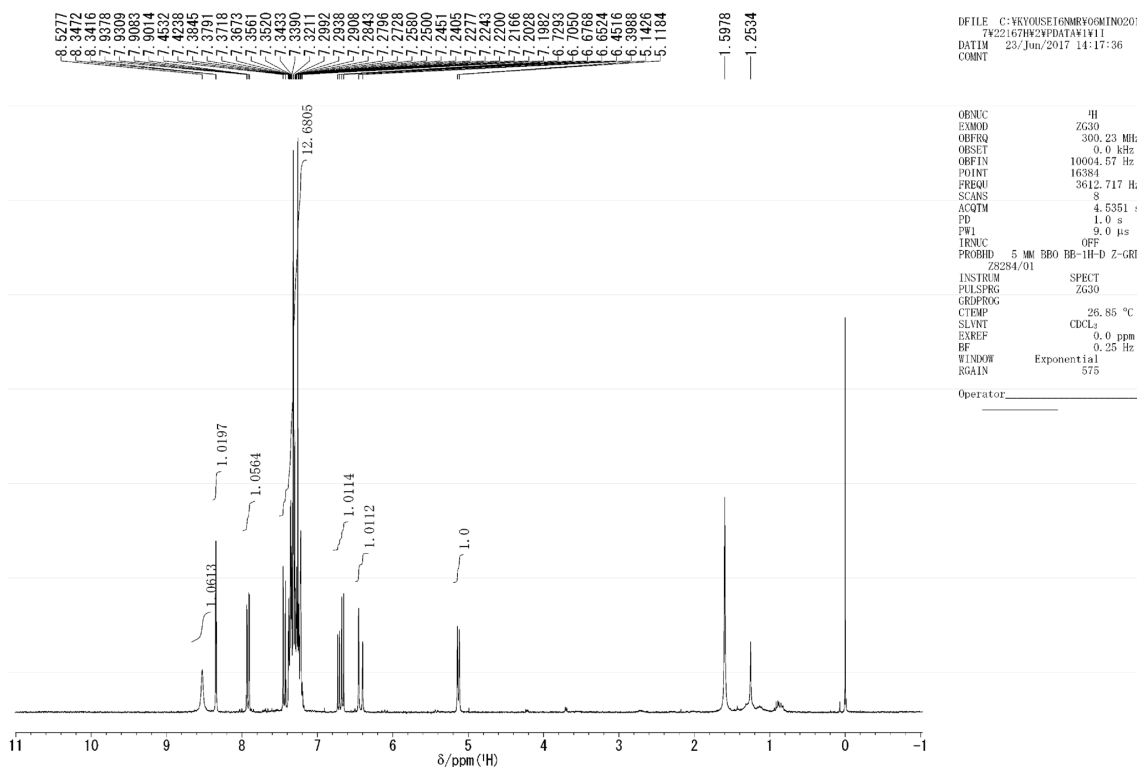

DFILE C:\KYOUSETI\NMR\YOG\INO201  
7922167HW\FDATA\F1W1  
DATIM 23/ Jun/2017 14:17:36  
COMBT

ORNUC <sup>1</sup>H  
EXMOD ZG30  
OBFREQ 300.23 MHz  
ORSET 0.0 kHz  
OBFIN 10004.57 Hz  
POINT 16384  
FREQU 3612.717 Hz  
SCANS 8  
ACQIM 4.5351 s  
PD 1.0 s  
PWI 9.0 μs  
IRNUC OFF  
PROBHD 5 MM BBO BB-1H-D Z-GRD  
ZS284/01  
INSTRUM SPECT  
PULSPRG ZG30  
GRPPROG  
CTEMP 26.85 °C  
SLVNT CDCl<sub>3</sub>  
EXREF 0.0 ppm  
BF 0.25 Hz  
WINDOW Exponential  
RGAIN 575  
Operator

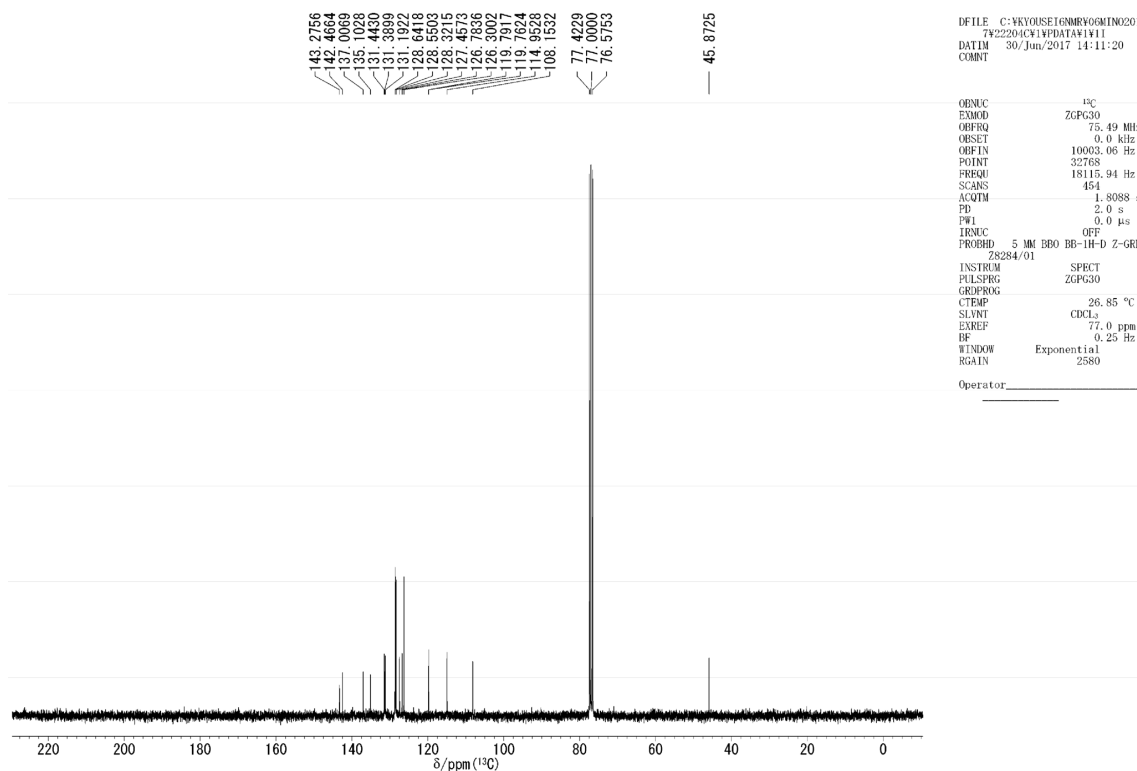

DFILE C:\KYOUSETI\NMR\YOG\INO201  
7922203CW\FDATA\F1W1  
DATIM 30/ Jun/2017 14:11:20  
COMBT

ORNUC <sup>13</sup>C  
EXMOD ZPG30  
OBFREQ 75.49 MHz  
ORSET 0.0 kHz  
OBFIN 10063.06 Hz  
POINT 32768  
FREQU 18115.94 Hz  
SCANS 454  
ACQIM 1.8088 s  
PD 2.0 s  
PWI 0.0 μs  
IRNUC OFF  
PROBHD 5 MM BBO BB-1H-D Z-GRD  
ZS284/01  
INSTRUM SPECT  
PULSPRG ZPG30  
GRPPROG  
CTEMP 26.85 °C  
SLVNT CDCl<sub>3</sub>  
EXREF 77.0 ppm  
BF 0.25 Hz  
WINDOW Exponential  
RGAIN 2580  
Operator

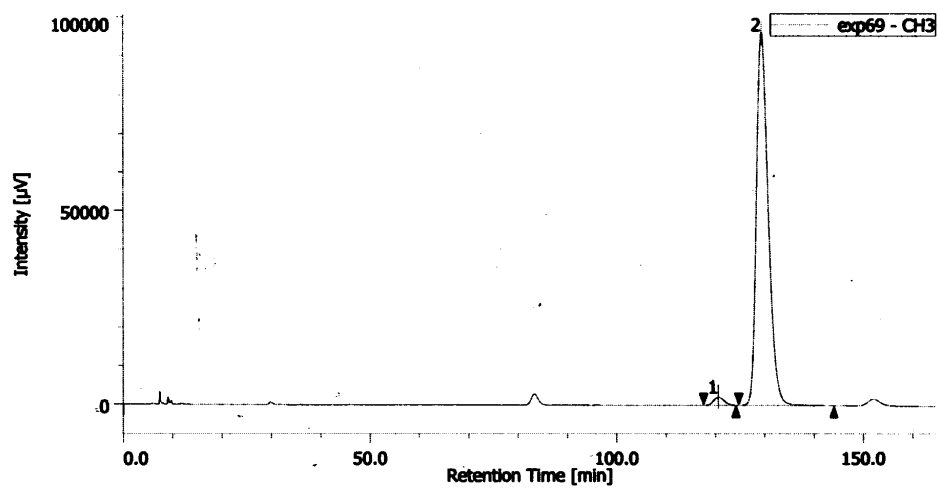

peak name

| # | ピーク名    | CH | tR [min] | area [μV·sec] | area%  |
|---|---------|----|----------|---------------|--------|
| 1 | Unknown | 3  | 120.533  | 316346        | 1.934  |
| 2 | Unknown | 3  | 129.375  | 16037220      | 98.066 |

(±)-9e

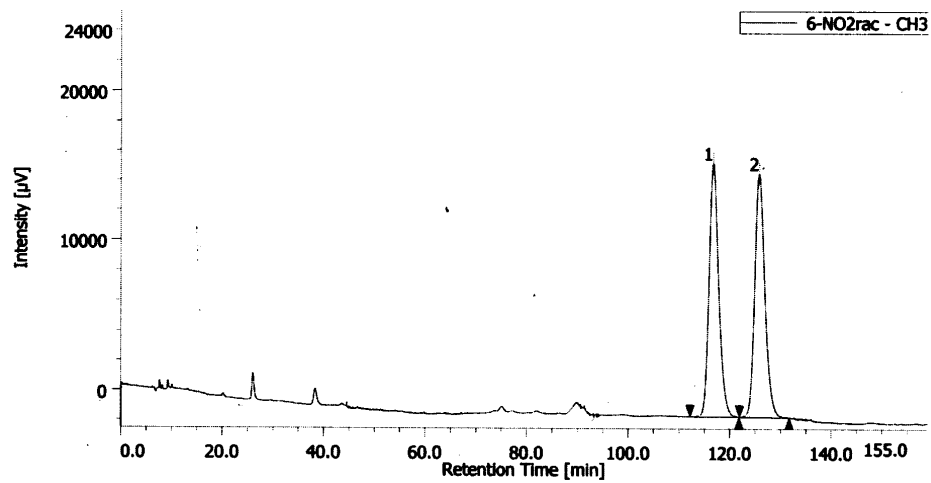

<sup>1</sup>H and <sup>13</sup>C NMR, and chiral phase HPLC chart of (R)-9f (Table 3, entry 6)

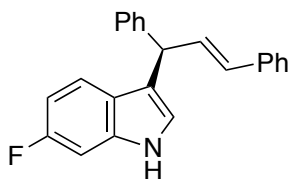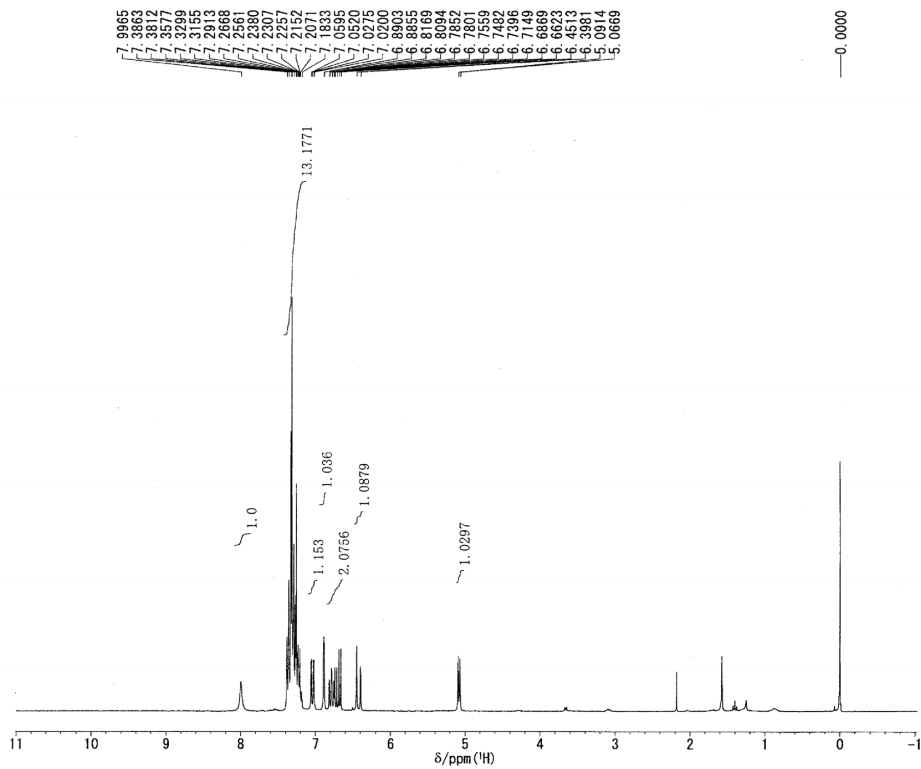

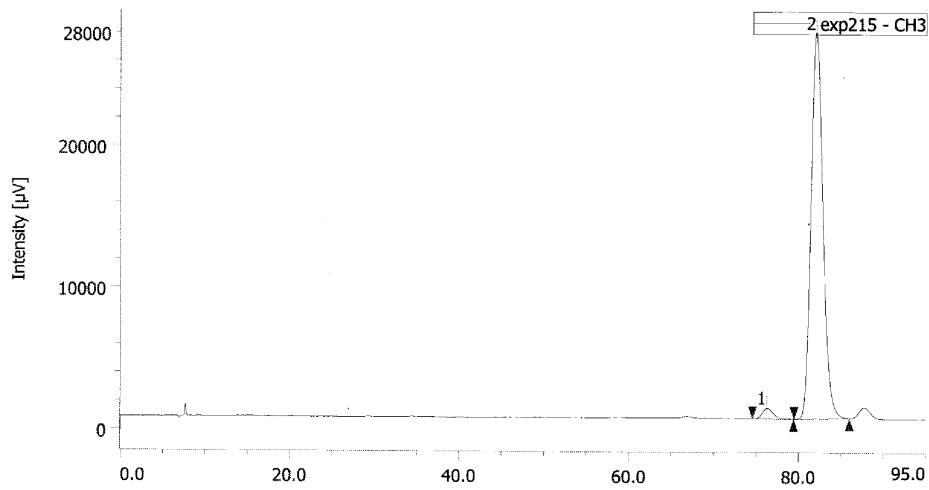

peak name

| # | ピーク名    | CH | tR [min] | area [μV·sec] | area%  |
|---|---------|----|----------|---------------|--------|
| 1 | Unknown | 3  | 76.3     | 66210         | 2.405  |
| 2 | Unknown | 3  | 82.0     | 2687301       | 97.595 |

(±)-9f

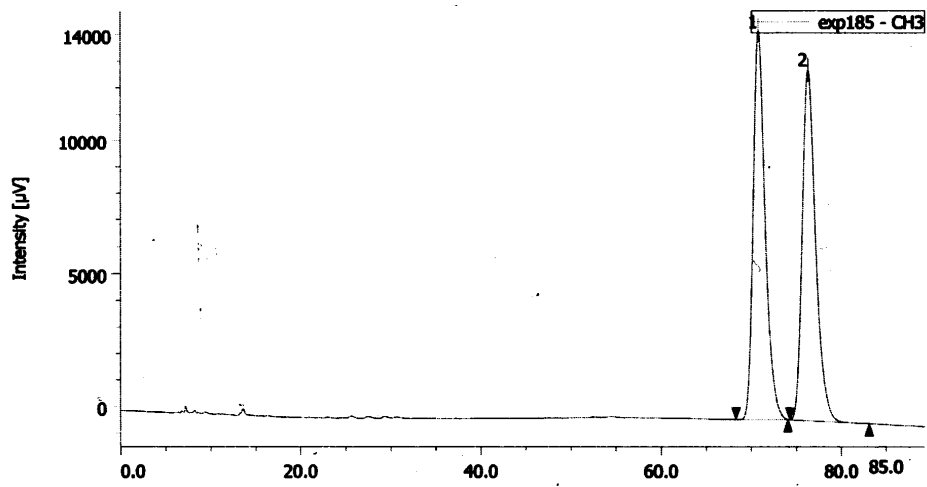





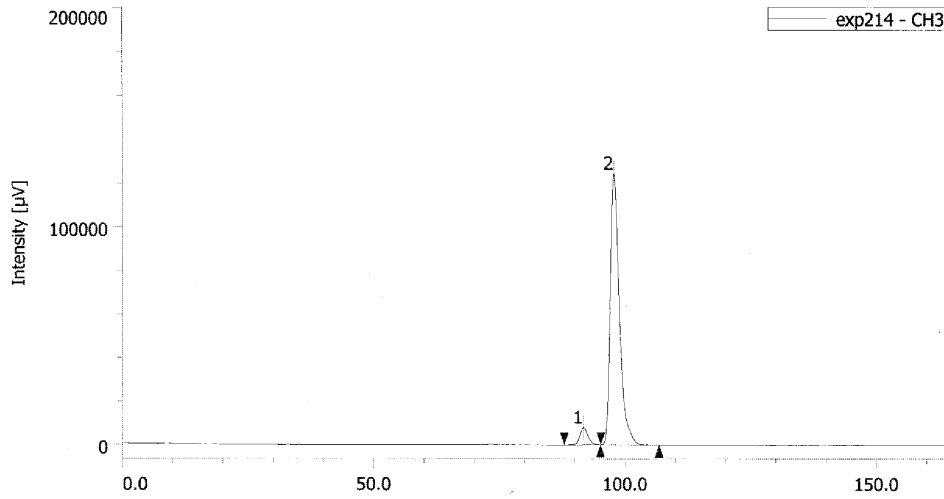

peak name

| # | ピーク名    | CH | TR [min] | area [μV·sec] | area%  |
|---|---------|----|----------|---------------|--------|
| 1 | Unknown | 3  | 91.7     | 898727        | 5.406  |
| 2 | Unknown | 3  | 97.8     | 15726310      | 94.594 |

(±)-9g

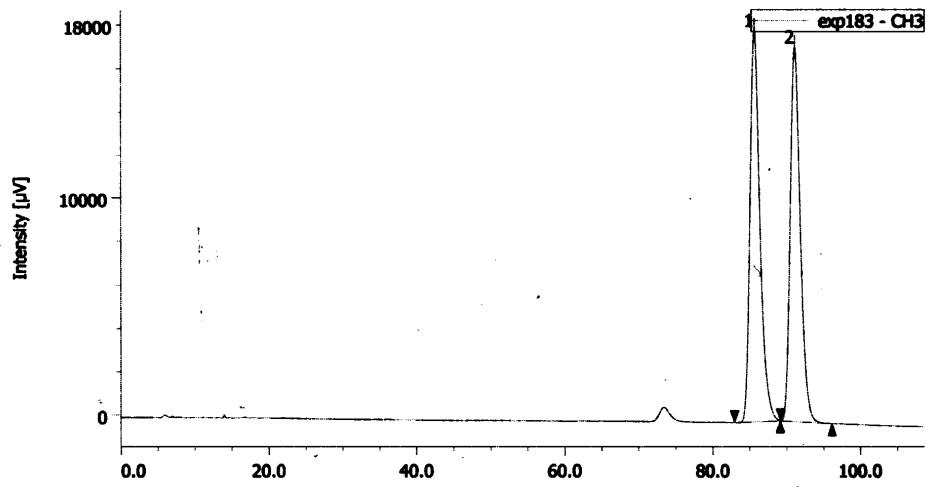

<sup>1</sup>H and <sup>13</sup>C NMR, and chiral phase HPLC chart of (*R*)-**9h** (Table 3, entry 8)

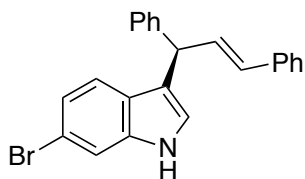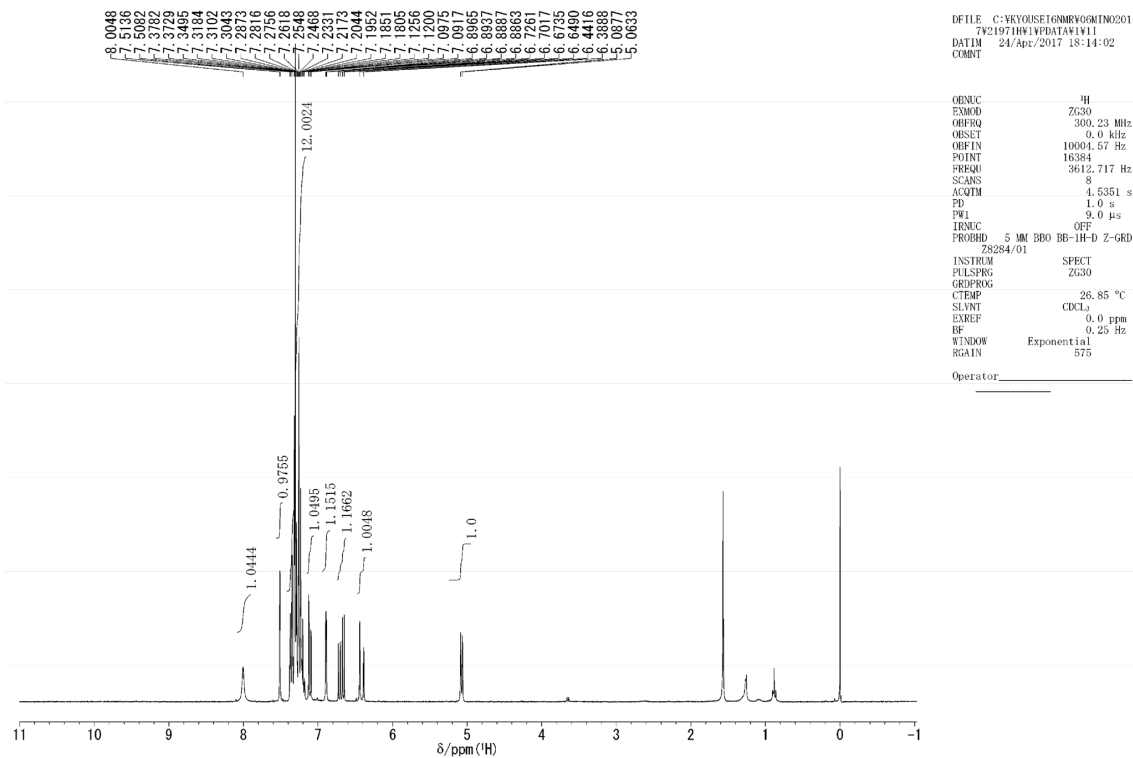

DFILE C:\KYOUSETI6\NMR\9G\IN0201  
 7\21971\H1\VPDATA\H1\11  
 DATIM 24/Apr/2017 18:14:02  
 COMBT

OBNUC <sup>1</sup>H  
 EXMOD ZG30  
 OFFRQ 300.23 MHz  
 ORSET 0.0 kHz  
 OFFIN 10004.57 Hz  
 POINT 16384  
 FREQH 3612.717 Hz  
 SCANS 8  
 ACQTM 4.5351 s  
 PD 1.0 s  
 PW 9.0 μs  
 IRNUC OFF  
 PROBH 5 MM BBO BB-1H-D Z-GRD  
 ZG284/01  
 INSTRUM SPECT  
 PULSPRG ZG30  
 GROPRG  
 CTMP 26.85 °C  
 SLVNT CDCl<sub>3</sub>  
 EXREF 0.0 ppm  
 BF 0.25 Hz  
 WINDOW Exponential  
 RGAIN 575

Operator \_\_\_\_\_

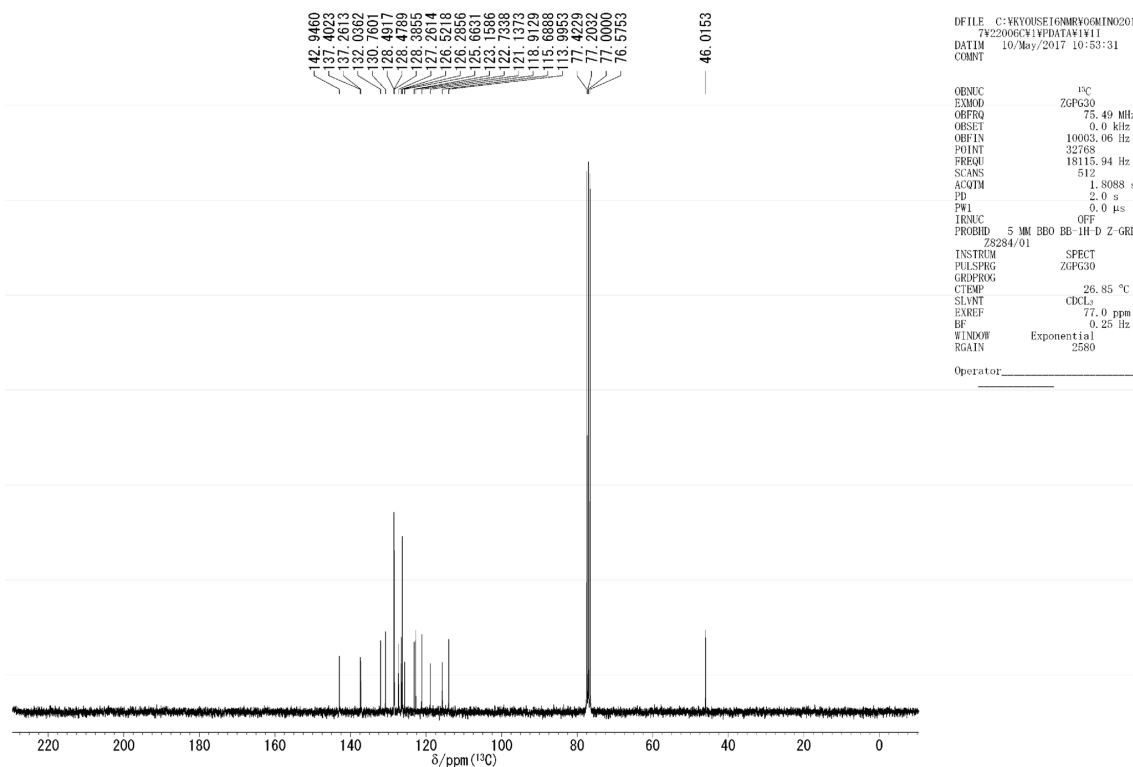

DFILE C:\KYOUSETI6\NMR\9G\IN0201  
 7\2200CF\VPDATA\H1\11  
 DATIM 10/May/2017 10:53:31  
 COMBT

OBNUC <sup>13</sup>C  
 EXMOD ZGPG30  
 OFFRQ 75.49 MHz  
 ORSET 0.0 kHz  
 OFFIN 10003.06 Hz  
 POINT 32768  
 FREQH 18115.94 Hz  
 SCANS 512  
 ACQTM 1.8088 s  
 PD 2.0 s  
 PW 0.0 μs  
 IRNUC OFF  
 PROBH 5 MM BBO BB-1H-D Z-GRD  
 ZG284/01  
 INSTRUM SPECT  
 PULSPRG ZGPG30  
 GROPRG  
 CTMP 26.85 °C  
 SLVNT CDCl<sub>3</sub>  
 EXREF 77.0 ppm  
 BF 0.25 Hz  
 WINDOW Exponential  
 RGAIN 2580

Operator \_\_\_\_\_

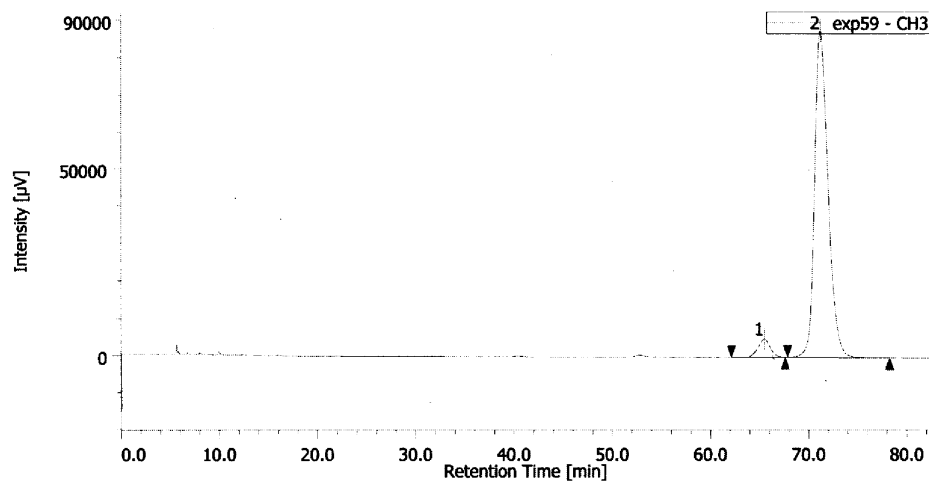

peak name      area      height      area%

| Peak | Retention Time [min] | Area    | Height | Area%  |
|------|----------------------|---------|--------|--------|
| 1    | 65.500               | 437396  | 5042   | 4.937  |
| 2    | 71.208               | 8421365 | 87567  | 95.063 |

(±)-9h

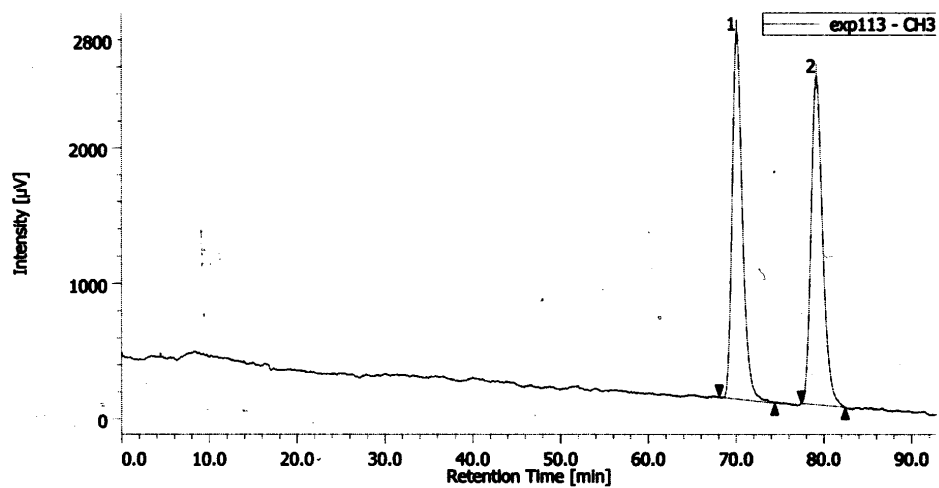

<sup>1</sup>H and <sup>13</sup>C NMR, and chiral phase HPLC chart of (*R*)-**9i** (Table 3, entry 9)

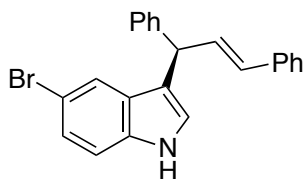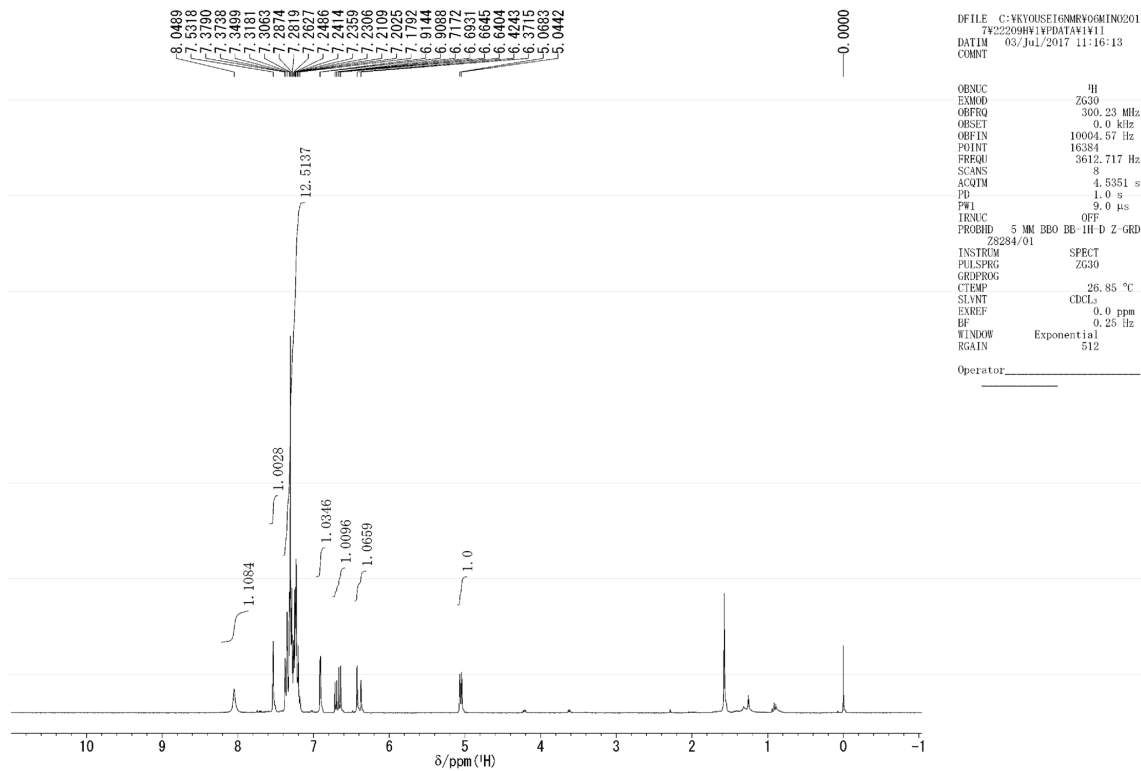

DFILE C:\YK\OUSE16\NMR\YOGMIN0201  
7422209HW\FDATA\14111  
DATIM 03/Jul/2017 11:16:13  
COMNT

ORNUC <sup>1</sup>H  
EXMOD ZG30  
OBFREQ 300.23 MHz  
OBSET 0.0 kHz  
OBFIN 10004.57 Hz  
POINT 16384  
FREQU 3612.717 Hz  
SCANS 8  
ACQTM 4.5351 s  
PD 1.0 s  
PWL 9.0  $\mu$ s  
IRNUC OFF  
PROBHD 5 MM BBO BB-1H-D Z-GRD  
Z8284/01  
INSTRM SPECT  
PULSPRG ZG30  
GRDPRG  
CTEMP 26.85  $^{\circ}$ C  
SLVNT CDCl<sub>3</sub>  
EXREF 0.0 ppm  
BF 0.25 Hz  
WINDOW Exponential  
RGAIN 512

Operator \_\_\_\_\_

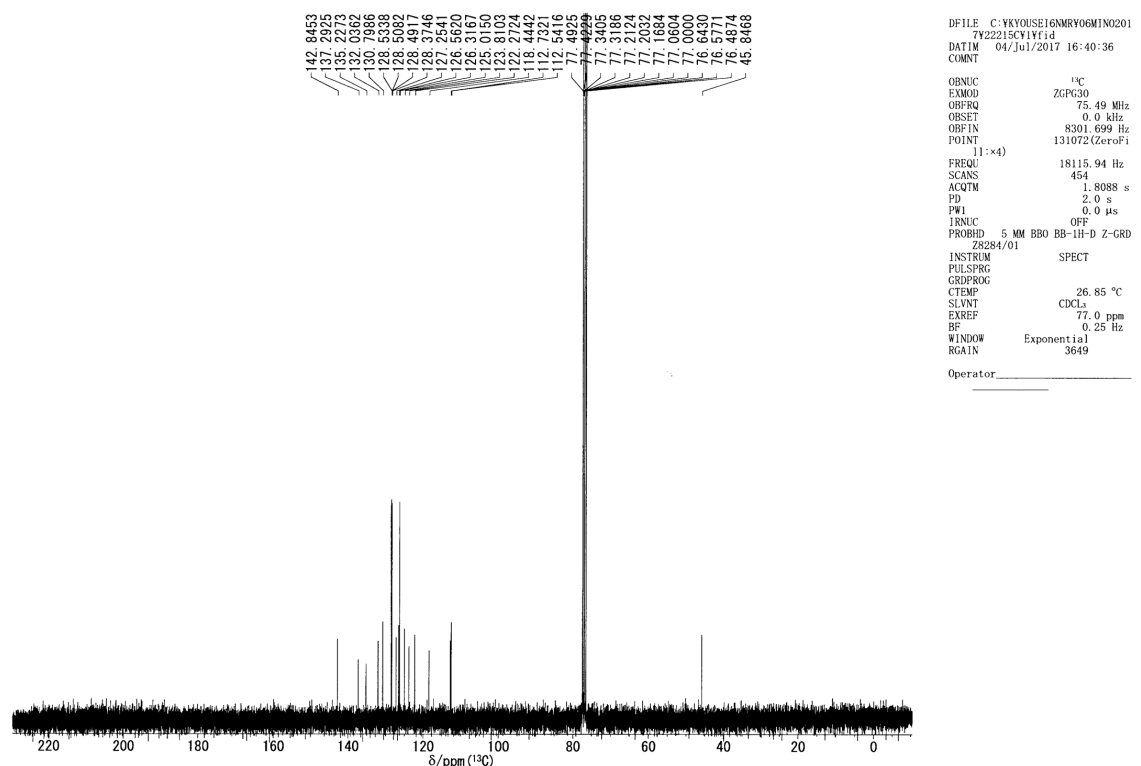

DFILE C:\YK\OUSE16\NMR\YOGMIN0201  
7422213CYIYFid  
DATIM 04/Jul/2017 16:40:36  
COMNT

ORNUC <sup>13</sup>C  
EXMOD ZGPC30  
OBFREQ 75.49 MHz  
OBSET 0.0 kHz  
OBFIN 8301.699 Hz  
POINT 131072(ZeroPi  
11:~4)  
FREQU 18115.94 Hz  
SCANS 454  
ACQTM 1.8088 s  
PD 2.0 s  
PWL 0.0  $\mu$ s  
IRNUC OFF  
PROBHD 5 MM BBO BB-1H-D Z-GRD  
Z8284/01  
INSTRM SPECT  
PULSPRG  
GRDPRG  
CTEMP 26.85  $^{\circ}$ C  
SLVNT CDCl<sub>3</sub>  
EXREF 77.0 ppm  
BF 0.25 Hz  
WINDOW Exponential  
RGAIN 3649

Operator \_\_\_\_\_

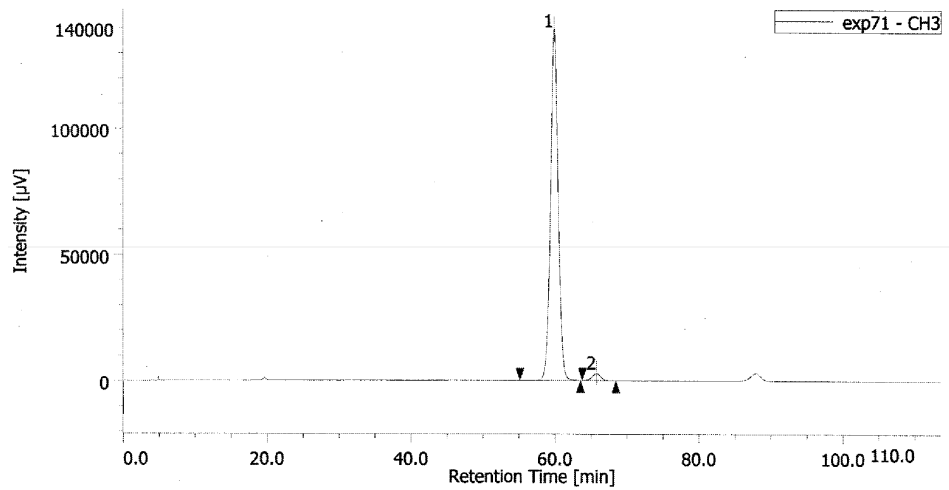

peak name

| # | ピーク名    | CH | TR [min] | area [ $\mu\text{V}\cdot\text{sec}$ ] | area%  |
|---|---------|----|----------|---------------------------------------|--------|
| 1 | Unknown | 3  | 59.850   | 10094480                              | 97.833 |
| 2 | Unknown | 3  | 65.742   | 223582                                | 2.167  |

( $\pm$ )-9i

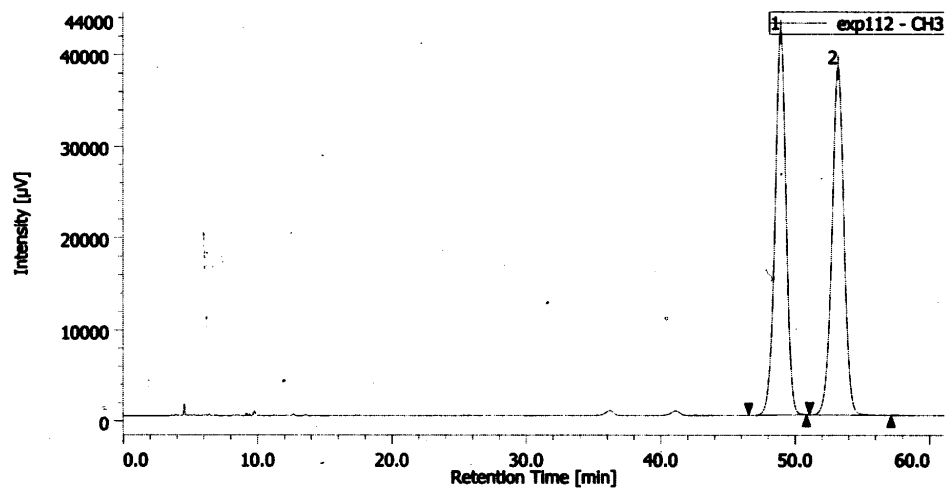

<sup>1</sup>H and <sup>13</sup>C NMR, and chiral phase HPLC chart of (*R*)-**9j** (Table 3, entry 10)

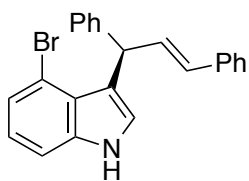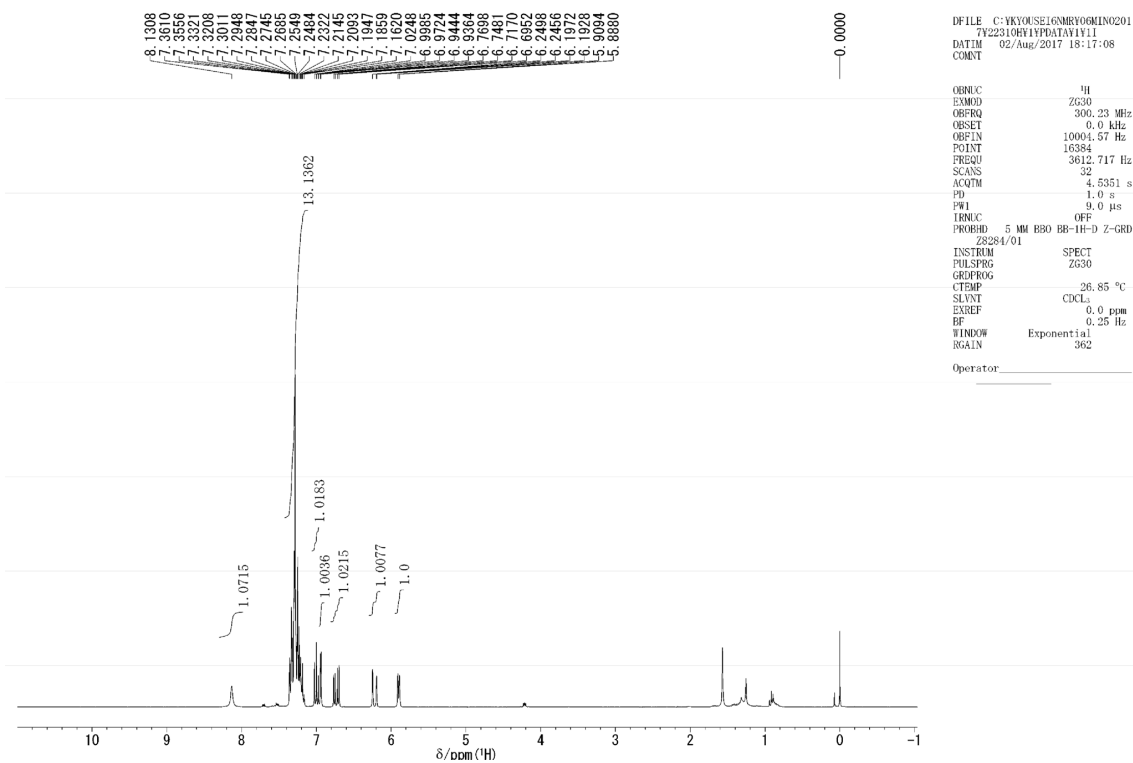

DFILE C:\KYOUSEI\6NMR\VO6M\N0201  
7Y22310HV1PDATA\V1Y11  
DATIM 02/Aug/2017 18:17:08  
COMNT

OBNUC <sup>1</sup>H  
EXMOD ZG30  
OBFRQ 300.23 MHz  
OBSET 0.0 kHz  
OBFIN 10004.57 Hz  
POINT 16384  
FREQU 3612.717 Hz  
SCANS 32  
ACQTM 4.5351 s  
PD 1.0 s  
PWI 9.0 μs  
IRNUC OFF  
PROBHD 5 MM BBO BB-HH-D Z-GRD  
28284/01  
INSTRUM SPECT  
PULSPRG ZG30  
GRDPRG  
CTEMP 26.85 °C  
SLVNT CDCL<sub>3</sub>  
EXREF 0.0 ppm  
BF 0.25 Hz  
WINDOW Exponential  
RGAIN 362  
Operator

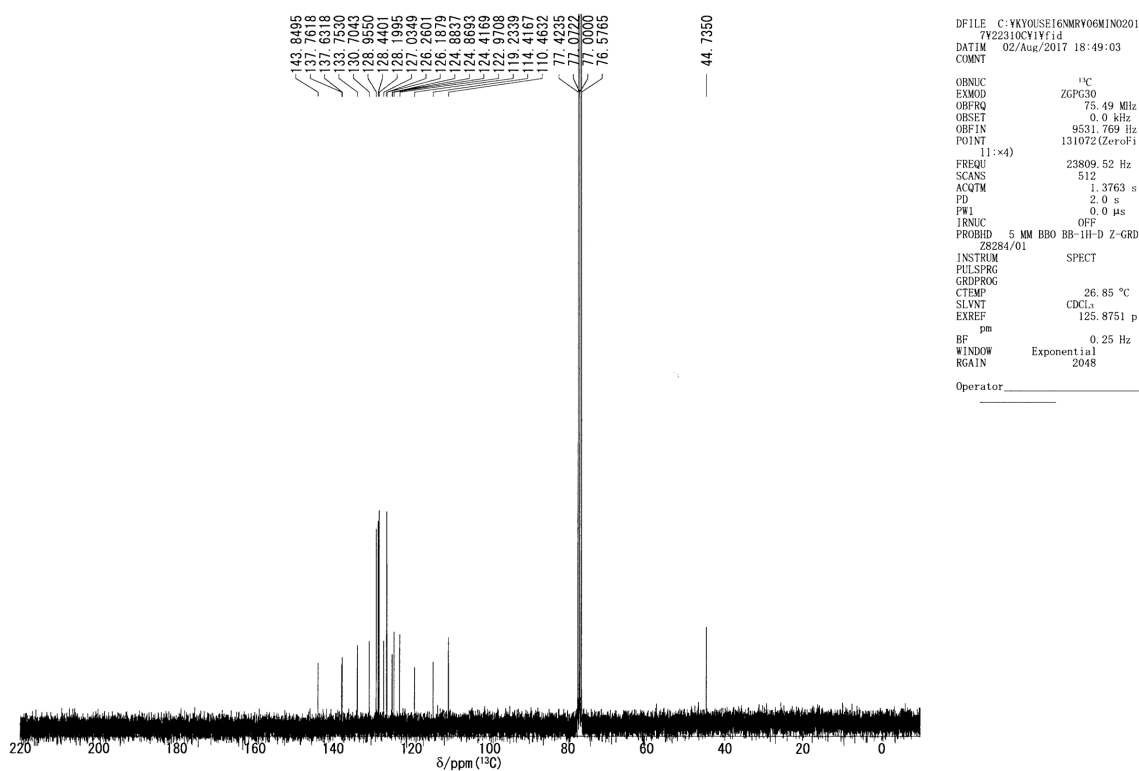

DFILE C:\KYOUSEI\6NMR\VO6M\N0201  
7Y22310CV1Y11d  
DATIM 02/Aug/2017 18:49:03  
COMNT

OBNUC <sup>13</sup>C  
EXMOD ZGPG30  
OBFRQ 75.49 MHz  
OBSET 0.0 kHz  
OBFIN 9531.769 Hz  
POINT 131072 (ZeroFi)  
11: x4  
FREQU 23809.52 Hz  
SCANS 512  
ACQTM 1.3763 s  
PD 2.0 s  
PWI 0.0 μs  
IRNUC OFF  
PROBHD 5 MM BBO BB-HH-D Z-GRD  
28284/01  
INSTRUM SPECT  
PULSPRG  
GRDPRG  
CTEMP 26.85 °C  
SLVNT CDCL<sub>3</sub>  
EXREF 125.8751 p  
pm  
BF 0.25 Hz  
WINDOW Exponential  
RGAIN 2048  
Operator

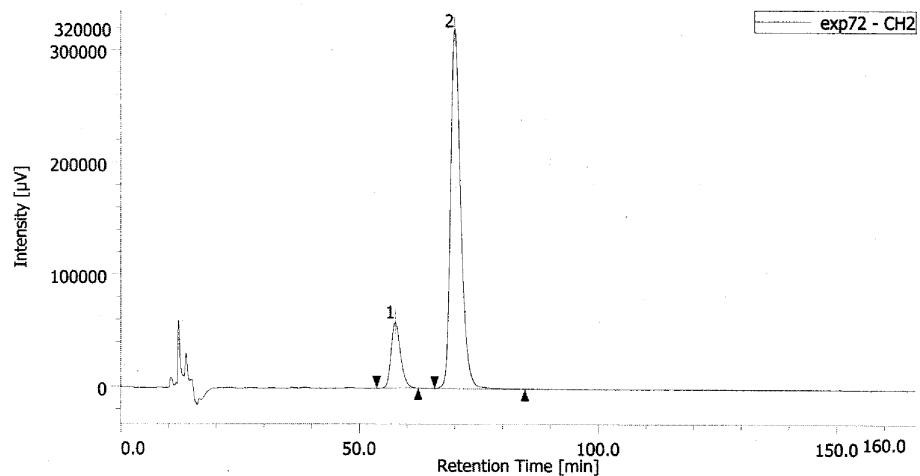

peak name

| # | CH      | CH | tR [min] | area [µV·sec] | area%  |
|---|---------|----|----------|---------------|--------|
| 1 | Unknown | 2  | 57.525   | 8016504       | 14.436 |
| 2 | Unknown | 2  | 69.950   | 47514564      | 85.564 |

(±)-9j

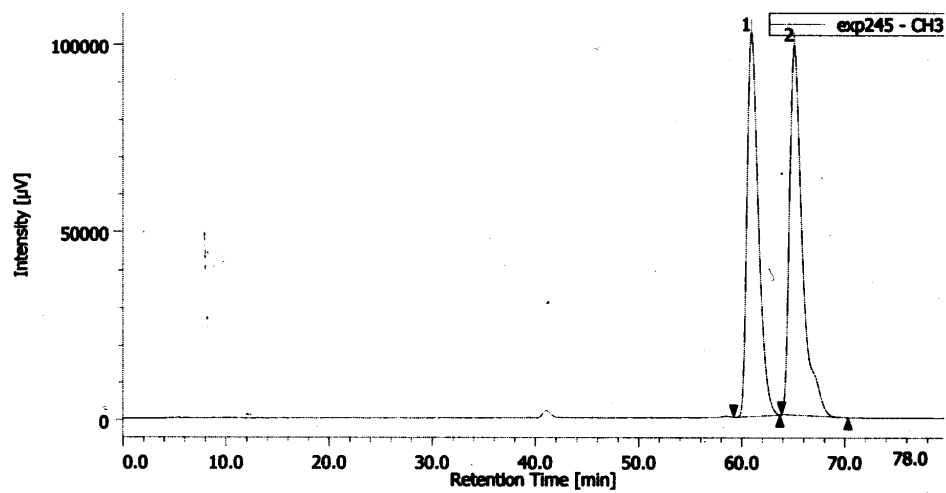



<sup>1</sup>H and <sup>13</sup>C NMR, and chiral phase HPLC chart of (*R*)-**9k** (Table 3, entry 11)

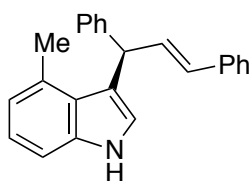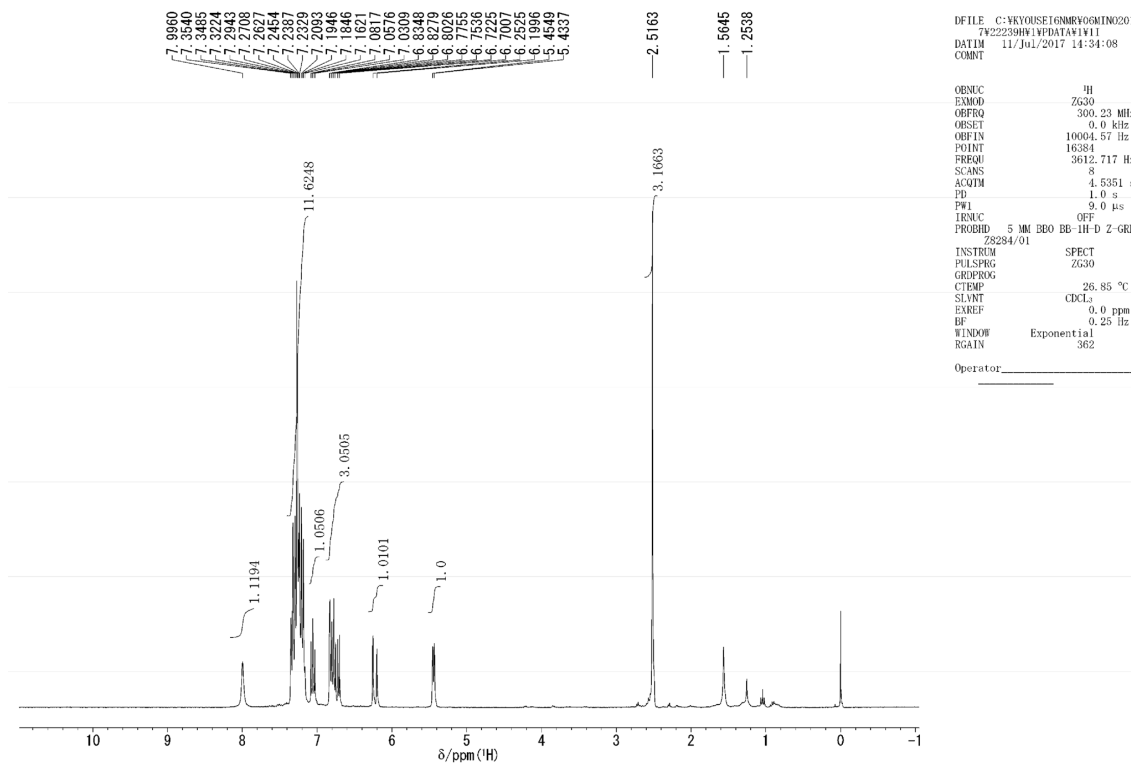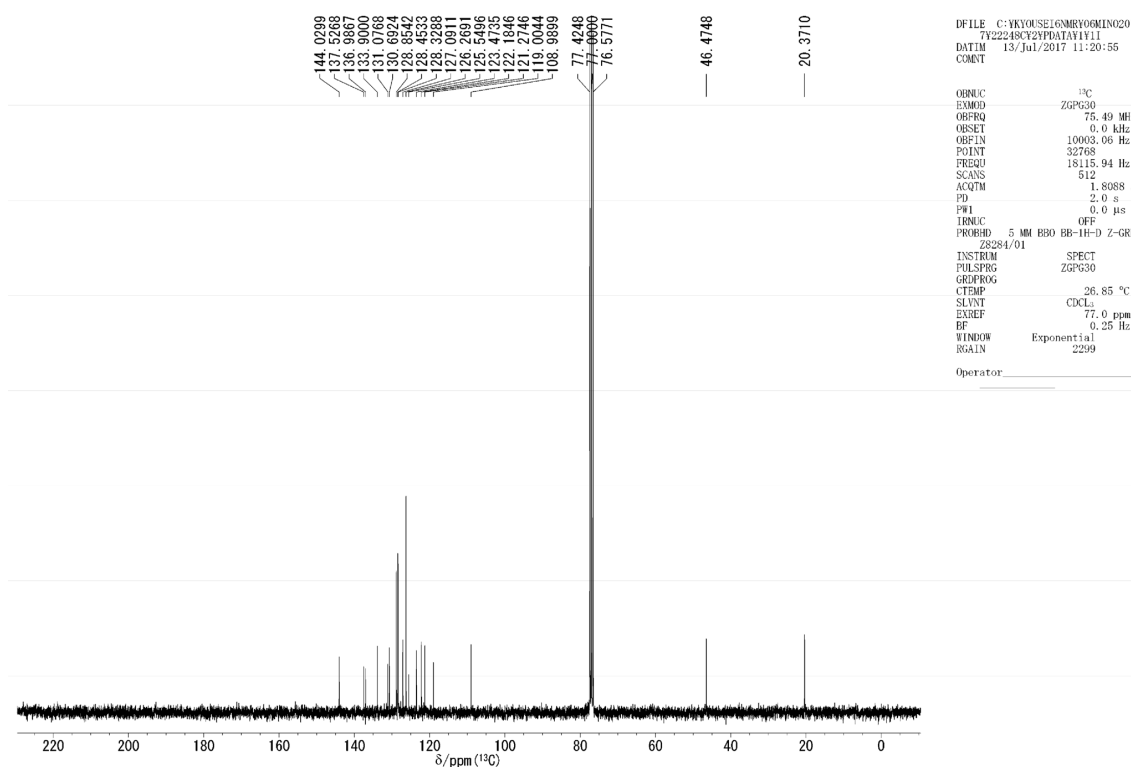

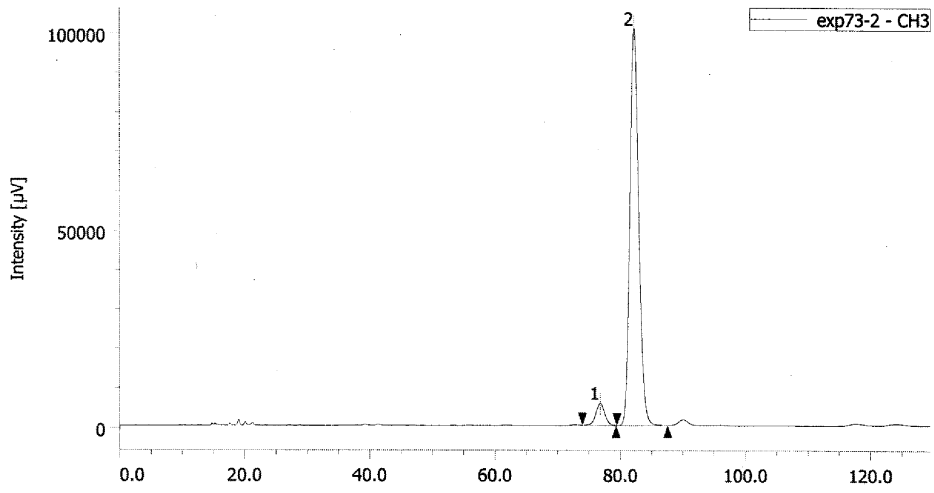

peak name

| # | ピーク名    | CH | TR [min] | area [μV·sec] | area%  |
|---|---------|----|----------|---------------|--------|
| 1 | Unknown | 3  | 76.8     | 539268        | 5.155  |
| 2 | Unknown | 3  | 82.1     | 9922279       | 94.845 |

(±)-9k

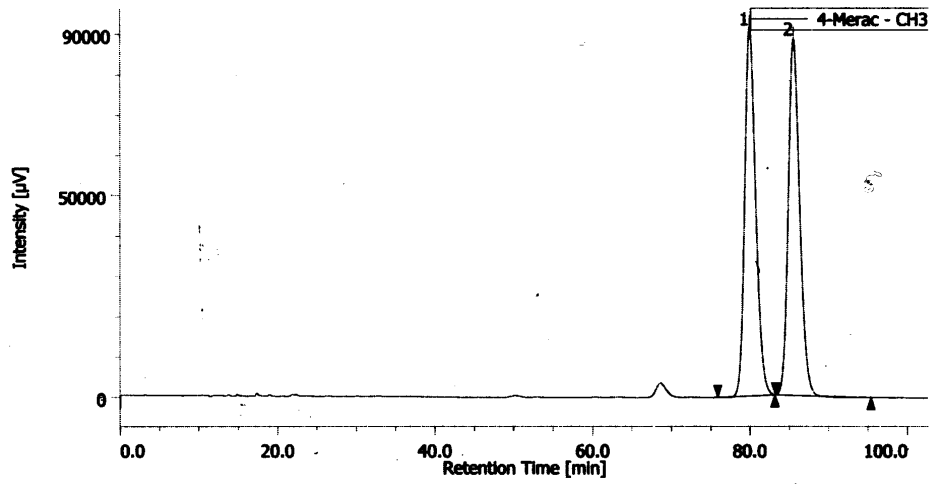

<sup>1</sup>H and <sup>13</sup>C NMR, and chiral phase HPLC chart of (*R*)-**9I** (Table 3, entry 12)

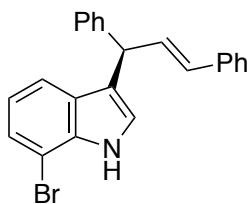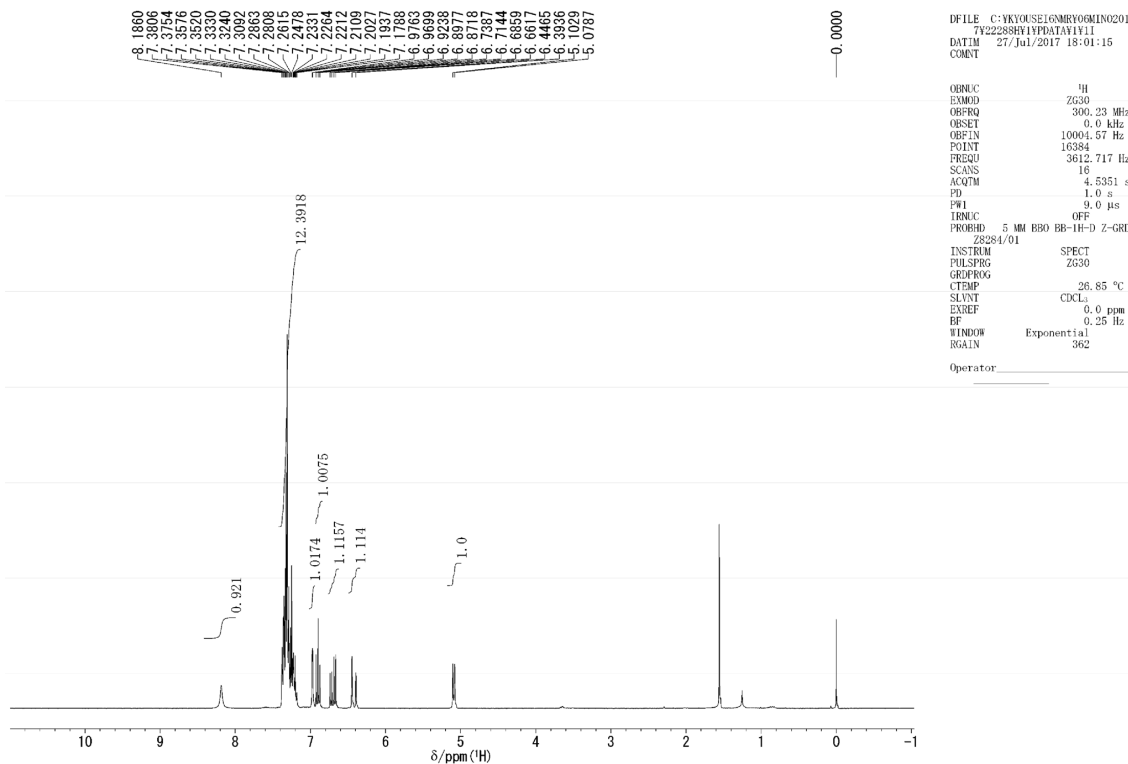

DFILE C:\KYOUSEI\6MR\Y06M10\201  
7Y22288Y1YPRATAY11  
DATIM 27/Jul/2017 18:01:15  
COMT

ORNUC <sup>1</sup>H  
EXMOD ZG30  
ORFRQ 300.23 MHz  
ORSET 0.0 kHz  
ORFIN 10004.57 Hz  
POINT 16384  
FREQU 3612.717 Hz  
SCANS 16  
ACQTM 4.5351 s  
PD 1.0 s  
PWI 9.0 μs  
IRNUC OFF  
PROBHD 5 MM BBO BB-HH-D Z-GRD  
ZS284/01  
INSTRUM SPECT  
PULSPRG ZG30  
GRDPRG  
CTEMP 26.85 °C  
SUNVT CDCL3  
EXREF 0.0 ppm  
BF 0.25 Hz  
WINDOW Exponential  
RGAIN 362  
Operator

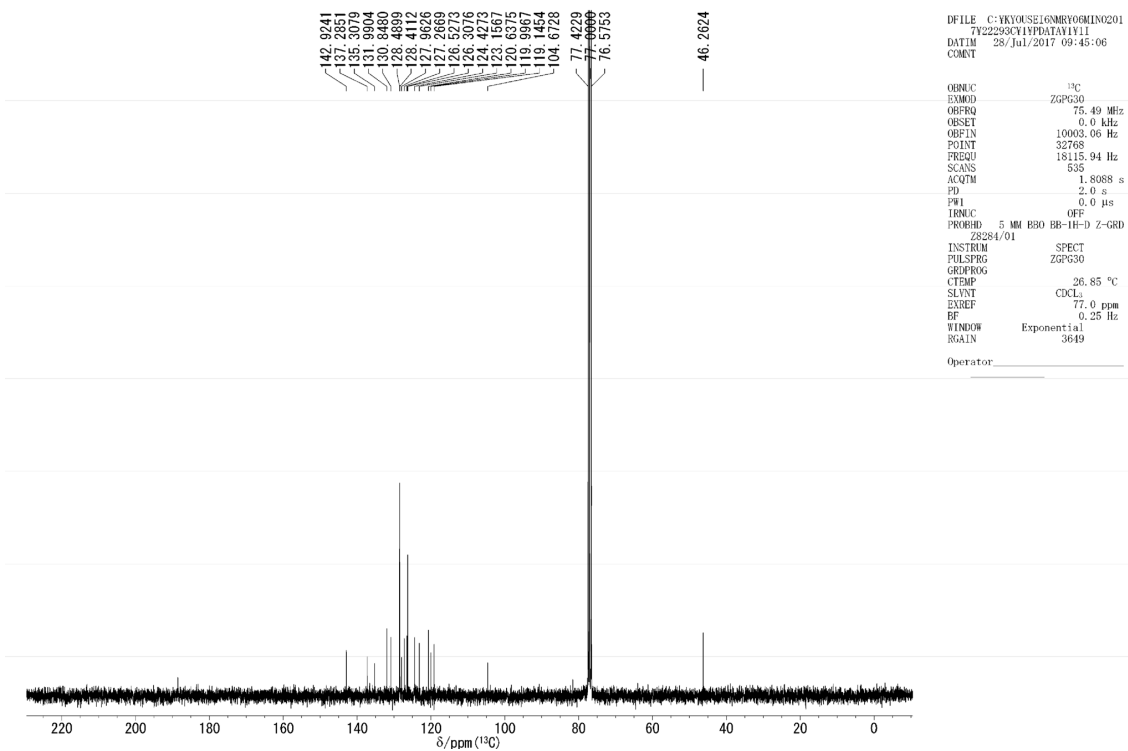

DFILE C:\KYOUSEI\6MR\Y06M10\201  
7Y22288Y1YPRATAY11  
DATIM 28/Jul/2017 09:45:06  
COMT

ORNUC <sup>13</sup>C  
EXMOD ZGPG30  
ORFRQ 75.49 MHz  
ORSET 0.0 kHz  
ORFIN 10003.06 Hz  
POINT 32768  
FREQU 18115.94 Hz  
SCANS 535  
ACQTM 1.8098 s  
PD 2.0 s  
PWI 0.0 μs  
IRNUC OFF  
PROBHD 5 MM BBO BB-HH-D Z-GRD  
ZS284/01  
INSTRUM SPECT  
PULSPRG ZGPG30  
GRDPRG  
CTEMP 26.85 °C  
SUNVT CDCL3  
EXREF 77.0 ppm  
BF 0.25 Hz  
WINDOW Exponential  
RGAIN 3649  
Operator

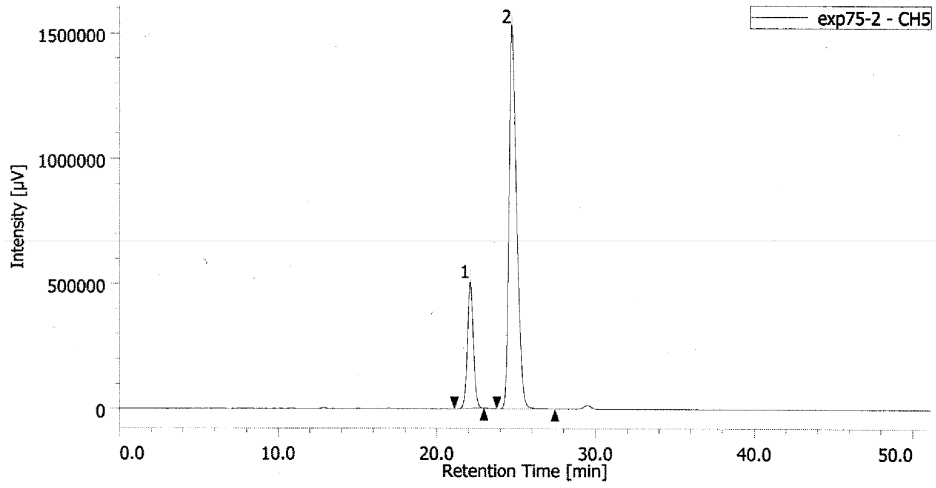

peak name

| # | CH      | TR [min] | area [ $\mu\text{V}\cdot\text{sec}$ ] | area%    |        |
|---|---------|----------|---------------------------------------|----------|--------|
| 1 | Unknown | 5        | 22.100                                | 13035572 | 20.386 |
| 2 | Unknown | 5        | 24.710                                | 50907963 | 79.614 |

(±)-91

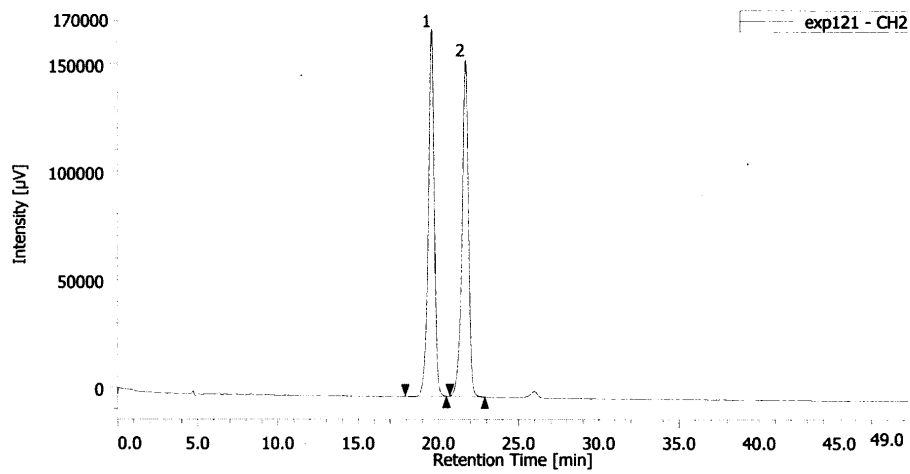

peak name

<sup>1</sup>H and <sup>13</sup>C NMR, and chiral phase HPLC chart of (R)-9m (Table 2, entry 13)

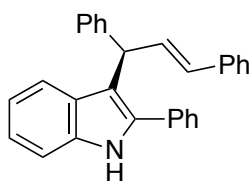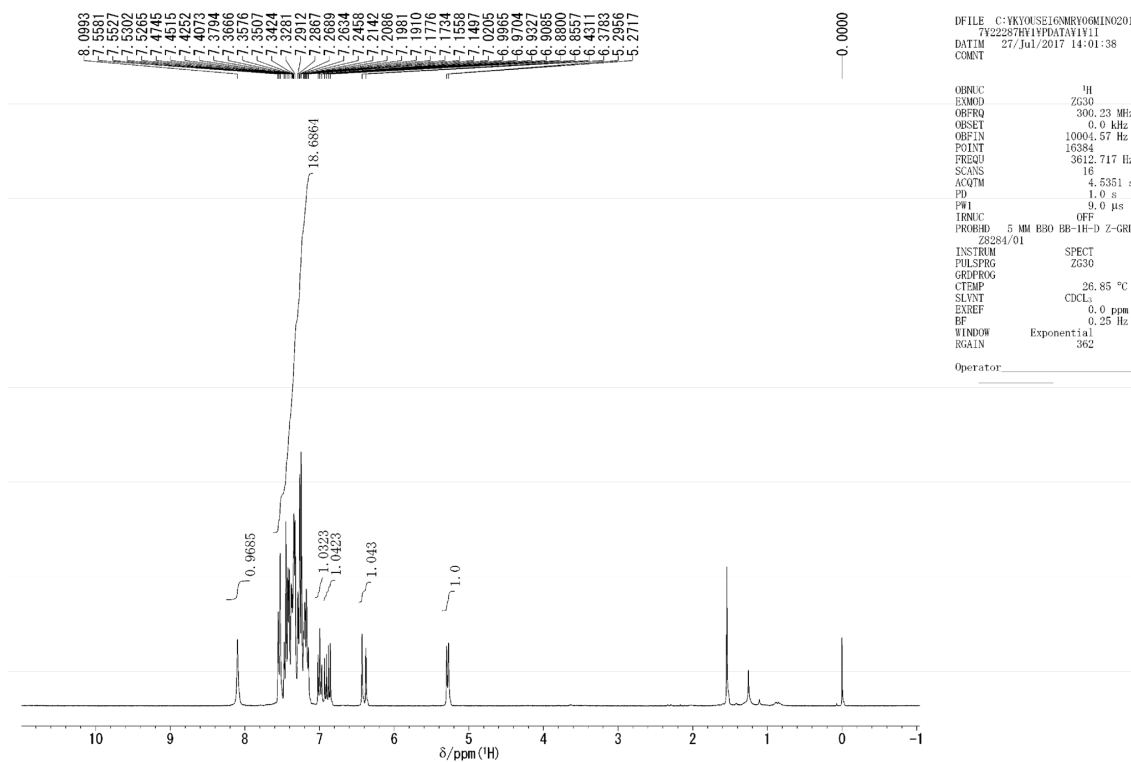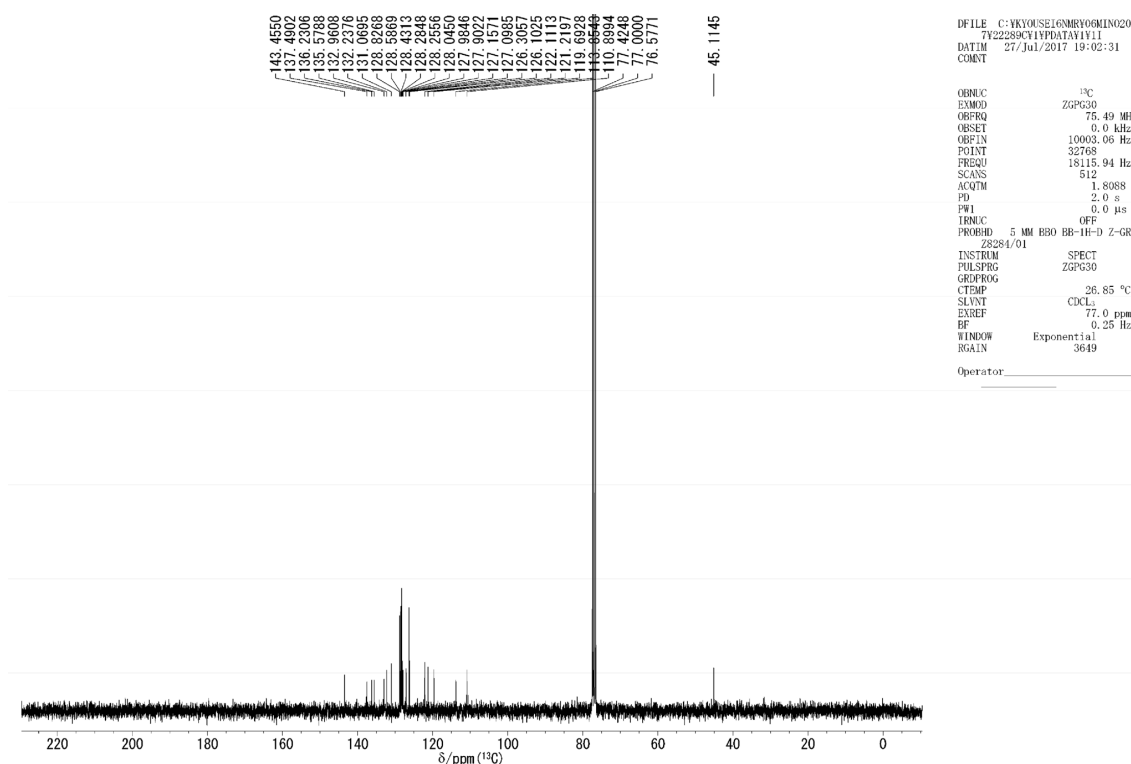

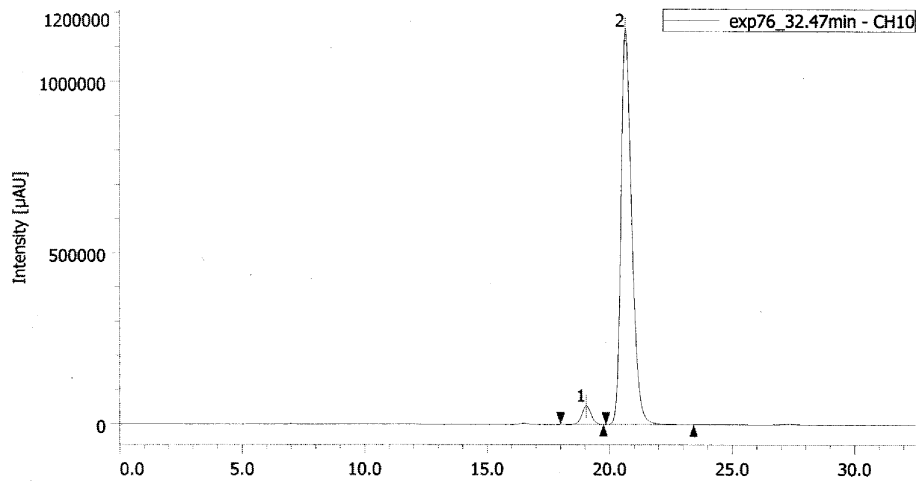

peak name

| # | ピーク名    | CH | tR [min] | area [μV.sec] | area%  |
|---|---------|----|----------|---------------|--------|
| 1 | Unknown | 10 | 19.0     | 1394440       | 3.830  |
| 2 | Unknown | 10 | 20.6     | 35014510      | 96.170 |

(±)-9m

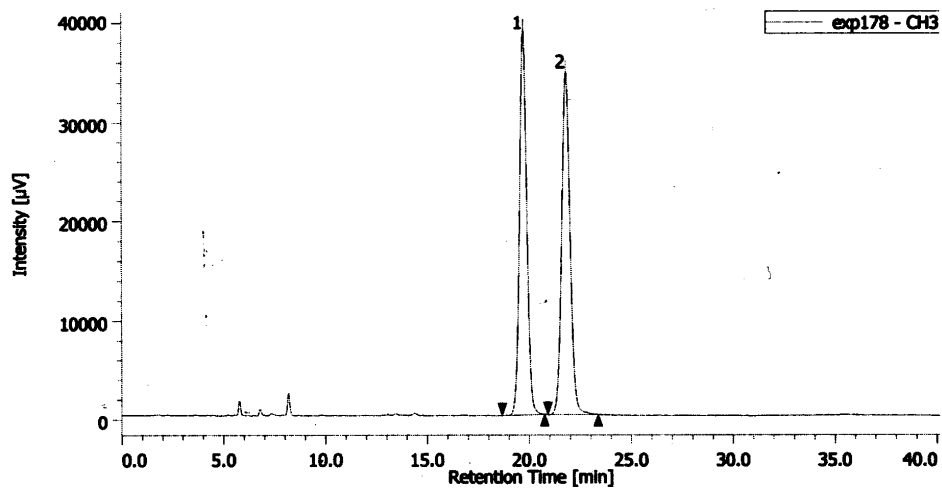

Supplement: c9ob00075e1.pdf [file c9ob00075e1.pdf]
